# Supplementary material for: Exonic splice regulation imposes strong selection at synonymous sites
Source: Genome Res. 2018 Oct;28(10):1442–54. doi: 10.1101/gr.233999.117 (PMC6169883; doi:10.1101/gr.233999.117)
Supplement: Supplemental Material [file supp_gr.233999.117_Supplemental_Tables.xlsx]

## Sheet: 0
1. Supplemental Table 1: Number of ESE and control sites per chromosome, as used for INSIGHT (INT3).
2. Supplemental Table 2: Nucleotide composition comparison between ESE and control sites, optimization-based method (INT3).
3. Supplemental Table 3: Normalized dS negative control (INT3).
4. Supplemental Table 4: INSIGHT negative control (INT3).
5. Supplemental Table 5: Full INSIGHT results (INT3).
6. Supplemental Table 6: The effect of varying the threshold between high and low frequency minor alleles on the INSIGHT analysis (human filtering; INT3).
7. Supplemental Table 7: multiDFE negative control (INT3).
8. Supplemental Table 8: Full multiDFE results (INT3).
9. Supplemental Table 9: Normalized dS negative control (other motif sets).
10. Supplemental Table 10: INSIGHT negative control (ESR).
11. Supplemental Table 11: INSIGHT negative control (RESCUE).
12. Supplemental Table 12: INSIGHT negative control (PESE).
13. Supplemental Table 13: INSIGHT negative control (Ke).
14. Supplemental Table 14: INSIGHT negative control (combined).
15. Supplemental Table 15: Full INSIGHT results (other motif sets).
16. Supplemental Table 16: multiDFE negative control, ancestral CpG filtering (other motif sets).
17. Supplemental Table 17: multiDFE negative control, human CpG filtering (other motif sets).
18. Supplemental Table 18: Full multiDFE results (other motif sets).
19. Supplemental Table 19: Full multiDFE results (RBP motifs).
(Supplemental Table 20 can be found in Supplemental_Figs_and_Texts.pdf).

## Sheet: 1
Number of ESE and control sites per chromosome, as used for INSIGHT (INT3).
chromosome	no CpG filtering		human CpG filtering		ancestral CpG filtering
	hits	controls	hits	controls	hits	controls
1	11849	39987	10953	31397	7881	23145
2	9075	28161	8440	23681	6068	16915
3	9133	30991	8516	24540	6158	18352
4	5334	15417	5081	13152	3749	10066
5	5488	16792	5147	14146	3510	10136
6	7058	23781	6567	18713	4545	12420
7	5178	16152	4851	12729	3194	8983
8	3931	12389	3610	9814	2824	8207
9	5479	18640	5044	14364	3966	11060
10	5471	17513	5065	14024	4080	11412
11	8623	28777	7923	21631	5904	17086
12	6389	21481	5928	17406	4035	12401
13	2312	7526	2203	6538	1682	4520
14	4531	14588	4253	12074	2547	7605
15	4182	13738	3880	10591	2917	8469
16	3521	12633	3162	9165	2466	7479
17	5862	22989	5259	17181	3767	12311
18	861	2793	809	2231	362	939
19	2691	13517	2282	8011	1319	4796
20	2790	10995	2503	7326	2048	6661
21	1306	4270	1197	3405	807	2592
22	2268	8470	2006	5739	1361	3861

## Sheet: 2
Nucleotide composition comparison between ESE and control sites, optimization-based method (INT3).
	no CpG filtering		human CpG filtering		ancestral CpG filtering		ancestral CpG filtering (human-chimp MRCA)
nucleotide	hits	controls	hits	controls	hits	controls	hits	controls
A	0.409736	0.3575	0.443769	0.425093	0.438504	0.415984	0.434036	0.407717
C	0.118812	0.141726	0.101965	0.113952	0.104693	0.11848	0.106318	0.119578
G	0.315486	0.343476	0.285346	0.280418	0.290694	0.289457	0.295421	0.299652
T	0.155965	0.157298	0.16892	0.180536	0.166109	0.176079	0.164225	0.173053

## Sheet: 3
Normalized dS negative control (INT3).
simulation	no CpG filtering	human CpG filtering	ancestral CpG filtering
1	-0.00182482	0.0131086	0.0356347
2	-0.0234657	0.00372439	-0.0152174
3	0.0221402	-0.0220994	-0.0407725
4	0.0110294	-0.00742115	0.0243363
5	0.0110092	0.00746269	0.0243902
6	-0.00909091	0.00373134	-0.00873362
7	-0.00364964	-0.0220994	0.0402685
8	-0.0127042	0.032197	0.0289532
9	0.0110294	0.00934579	0.0132159
10	0	0.0018622	-0.021645
11	-0.0198915	0.0131332	0.0379464
12	-0.0163043	-0.0147874	0.0447427
13	-0.0216606	-0.0202952	-0.00653595
14	-0.0198915	-0.0184502	-0.0280172
15	0.00550459	0.0244821	0.00659341
16	-0.00364299	-0.00371747	-0.0151844
17	-0.0127042	0.0150094	-0.0344086
18	0.014733	-0.0111111	-0.0152505
19	0.00365631	-0.0147874	0.0243363
20	-0.0252708	0.00373134	-0.0108696
21	0.00365631	0.0244821	-0.0280172
22	-0.0109091	0.0378788	0.0334076
23	0	-0.00742115	-0.00655022
24	-0.0341113	-0.0257353	-0.0408602
25	0.0221811	0.0093633	-0.0152174
26	0.003663	-0.0202952	0.0243902
27	-0.00182482	-0.0202578	-0.0406852
28	0	0.00747664	0.0221729
29	0.0165746	-0.0184502	0.010989
30	0.0110092	-0.0147874	0.0332594
31	-0.00364299	0.0131086	0.0043956
32	0.0372439	-0.0166052	-0.0238095
33	0.003663	-0.00925926	0.0378619
34	0.0334572	-0.0018622	0.0311804
35	0.0184162	0	-0.0237581
36	-0.00182482	0.0379507	-0.0130435
37	-0.00728597	0.0131332	-0.0043573
38	0.003663	0.00934579	-0.0151844
39	-0.00909091	0.00559701	0.0132159
40	-0.0163043	-0.00742115	0.0132159
41	-0.0109091	0.00747664	0.0154525
42	0.0147059	-0.00371747	0
43	0	0.0018622	-0.0043573
44	0.014733	0.00186567	0.0176211
45	-0.0181159	-0.0294118	-0.00655022
46	0.00733945	-0.00371058	0.0265487
47	0.0128676	-0.0220994	-0.0322581
48	0.014733	0.0302457	-0.0043573
49	-0.0144928	-0.00556586	-0.0194805
50	-0.0288288	-0.0275735	0.00657895
51	-0.0127042	0.0150094	0.0176211
52	-0.0163043	0.011194	0.0132159
53	0.00182815	0.00373134	-0.0194805
54	-0.0109091	0.0018622	0.0311804
55	-0.027027	0.0150376	-0.0469083
56	0.0128676	-0.0202952	-0.0087146
57	-0.00182482	-0.0166359	0.0043956
58	0.003663	0	-0.00434783
59	-0.00910747	-0.0018622	-0.0173913
60	-0.0341113	0.00747664	-0.0108696
61	-0.0181159	0.00934579	-0.0344828
62	0.00732601	-0.0561594	0.0132159
63	-0.0234234	0.0206767	-0.0173913
64	0.003663	-0.00185874	0.00656455
65	0.0165746	-0.00557621	-0.0215983
66	0.00182815	-0.0111111	0.0043956
67	0.00733945	0.0018622	-0.00869565
68	0.0147059	0.0225989	0.0266075
69	0.00549451	0.00559701	-0.0259179
70	-0.0163339	-0.0147874	-0.00653595
71	-0.00909091	0.0264151	0.0356347
72	0	0.0340909	0.00656455
73	-0.0127273	-0.00556586	0.0289532
74	0.0296846	-0.0110906	0.0538117
75	0.025878	-0.0275735	0
76	-0.00909091	-0.00742115	0.00438596
77	-0.0234657	-0.00185874	0.00218818
78	0	-0.00557621	0.00879121
79	0.00365631	-0.0018622	0.00883002
80	0.003663	-0.0147874	0.0043956
81	0.0240296	-0.0202578	0
82	-0.00907441	-0.00927644	0.00657895
83	-0.037702	-0.0111111	0.00218341
84	-0.0411449	-0.0110906	0.0177384
85	0.00733945	0	-0.0043573
86	-0.00182482	-0.0508167	0.00219298
87	0.0334572	-0.00925926	0.04
88	-0.00364299	0.0018622	-0.0405983
89	0.00733945	-0.00371747	0.0334076
90	-0.00182482	-0.0256881	-0.0130152
91	0.0296846	-0.0220994	-0.0043573
92	0.035316	0.0168856	-0.027957
93	-0.0127042	0.0149813	-0.0344086
94	-0.0127042	-0.0202578	-0.0108696
95	0.0018315	0	-0.0215983
96	0.0110294	0.0150094	0.0154525
97	0.00549451	0.00373134	0.00879121
98	-0.00727273	-0.00925926	-0.0108696
99	0.003663	0.0169173	-0.0087146
100	-0.0376344	-0.0202578	0.0289532
101	0.0165746	-0.0111111	0
102	-0.0252252	-0.012939	0.0154867
103	0.0259259	-0.012963	-0.021692
104	0	-0.00740741	0.013245
105	-0.0145191	0.0244821	-0.00656455
106	-0.00546448	0.0150376	-0.0429185
107	-0.00909091	0.00560748	0.0176991
108	0.00733945	0.0131332	0.0311111
109	-0.0109091	-0.00185874	0.0288248
110	0.0018315	0	0.00657895
111	0.00182815	0.0131086	-0.0533049
112	-0.00546448	-0.0239411	-0.0259179
113	-0.00909091	0.0093633	-0.0108696
114	0.00550459	0.0169173	-0.0280778
115	0.0110294	-0.0220994	-0.0280778
116	0	-0.0184502	-0.021692
117	-0.032316	0.0321361	0.0355556
118	0.0166052	0.0018622	-0.0280172
119	-0.00182482	-0.0018622	0.0311111
120	-0.00909091	-0.0275735	-0.00218341
121	-0.00728597	0.00560748	-0.0280172
122	0.00919118	-0.0018622	0.00438596
123	-0.0127273	-0.00371058	-0.0043573
124	0.0165441	0.011236	-0.0280778
125	0.00365631	0.00186567	0.00879121
126	-0.00907441	-0.0275229	-0.021645
127	-0.00364964	0.00747664	-0.0406852
128	-0.00547445	-0.012939	-0.00218818
129	-0.00364299	0.011236	-0.0108932
130	-0.00909091	0.00373134	-0.0406852
131	-0.00910747	0	-0.0385439
132	-0.0108893	0.0150094	0.00219298
133	-0.00182815	0.0206767	-0.0259179
134	0	0.0131086	0
135	-0.00727273	-0.0275229	-0.0386266
136	0.003663	-0.0147874	-0.0259179
137	-0.00547445	-0.0166052	-0.0322581
138	0.0184502	-0.00371747	0.00219298
139	-0.0109091	0	0.0110132
140	-0.00546448	-0.0110906	0.0220751
141	-0.0109091	0.00560748	-0.0130435
142	0.00549451	-0.0166359	0.0110132
143	-0.0144928	0.00747664	-0.0696203
144	0.0184502	0.00559701	-0.0108696
145	-0.0127042	0.0131332	-0.0301075
146	-0.0127042	0.00747664	0.0266667
147	-0.00182482	0.0378788	0.0221729
148	0.00550459	0.0131332	0
149	0.00548446	0.0018622	-0.00218341
150	0.0202952	-0.00557621	-0.0130719
151	0.0296296	-0.00371747	0.00659341
152	-0.00546448	0.00373832	0.0356347
153	0.0410448	0.0225564	0.01766
154	0.0128676	0.0169173	-0.00869565
155	-0.00545455	-0.00556586	0.0377778
156	0.0110294	-0.0166052	0.0154525
157	0.014733	-0.0018622	0.0198675
158	-0.00182482	0.00559701	-0.00218341
159	-0.00728597	0.00746269	-0.0469083
160	0.00365631	-0.00742115	-0.0194805
161	0.0202952	0.0149813	0
162	-0.00546448	0.00749064	0.0447427
163	0.003663	0.0131332	-0.0151844
164	-0.0127042	-0.00557621	0.0154185
165	0.0240296	-0.0166052	0.00879121
166	0.00733945	0.0093633	-0.00869565
167	-0.0127042	0.00373134	0.00218818
168	0.0259259	0.00934579	-0.0215983
169	-0.00547445	0.0264151	0.0154525
170	0.0128913	-0.00556586	-0.0194384
171	0.00733945	-0.0147874	0.0132159
172	0.00733945	-0.040146	0.00879121
173	-0.0376344	0.0131086	-0.0237069
174	0.0202952	-0.00372439	-0.017316
175	0	-0.00743494	0.0132159
176	-0.00364299	0.0264151	0.00877193
177	0.003663	0.0264151	-0.017316
178	-0.00909091	0.00186567	0.0110132
179	0.0165746	-0.0184843	0.0198675
180	-0.0180832	-0.0329068	0.0446429
181	-0.0234657	-0.0147874	-0.0130152
182	0.00549451	0.00934579	-0.0531915
183	0.014733	0.018797	0.00219298
184	-0.0127042	0.0018622	-0.0364807
185	0	-0.00371058	-0.0087146
186	-0.0305755	0.0206767	-0.00653595
187	-0.0109091	-0.0018622	0.00879121
188	0.0018315	0.0150094	-0.0130152
189	0.00549451	0.00747664	0.00660793
190	-0.00364299	-0.00185874	-0.0130435
191	0.00732601	-0.00742115	-0.0258621
192	0.00732601	-0.0018622	-0.0194384
193	-0.00364964	0.0225989	0.010989
194	0.00549451	-0.00743494	0.00437637
195	0.00917431	-0.0220994	-0.0130435
196	-0.0359066	0.00747664	0.01766
197	0.00549451	-0.00556586	-0.0194805
198	0.0202952	-0.00371747	0.0401786
199	0.0128676	0.00373134	0.0243363
200	-0.00909091	-0.0202578	0.00659341
201	0.00917431	-0.0110906	0.00437637
202	-0.0127273	-0.0220994	-0.00436681
203	-0.0252252	0.00559701	0.0701357
204	0.0165746	0.0150094	-0.0152174
205	0.0110294	-0.00555556	0.00657895
206	0.0128676	-0.0147601	-0.0151844
207	0.00917431	0.0225564	-0.0173536
208	-0.00728597	-0.00371058	0.0401786
209	-0.00909091	0.0018622	-0.0302376
210	-0.0127042	0	0.010989
211	0.00917431	0.0283554	-0.0280172
212	0.0128913	0.018797	-0.0259179
213	0.0184162	-0.00185874	-0.0195228
214	-0.0126812	-0.0202578	-0.0151844
215	0.00733945	0.00747664	-0.0108932
216	-0.00546448	-0.0110906	-0.021645
217	-0.0127042	-0.0202578	-0.00218341
218	0.0259259	-0.0418944	0.0446429
219	0.00732601	0.0131086	-0.0130435
220	-0.0216998	0.0283019	-0.0217391
221	-0.00364964	-0.00185874	-0.0512821
222	-0.0163043	-0.00185874	-0.0364807
223	-0.0340502	0.00559701	-0.0194805
224	-0.00728597	-0.00185874	-0.0280172
225	0.0277778	0.00373134	0.0379464
226	0.00549451	0.018797	0.0243363
227	0.00917431	0.0018622	0.0288248
228	0.00182815	-0.012939	-0.0130719
229	0.0184162	-0.00185874	0.0198238
230	-0.0109091	0.0169173	-0.0130435
231	-0.00182482	-0.0166359	0.013245
232	0	-0.0166052	-0.00218341
233	0	-0.00927644	0.0264901
234	0.0128676	0.00186567	0.0356347
235	0.00549451	0.00559701	0.0266667
236	-0.00728597	-0.00742115	0.00877193
237	-0.0163339	0.011236	0.0355556
238	0.003663	-0.0293578	0.0110132
239	-0.00546448	-0.00925926	0.00879121
240	-0.0144928	0.00372439	-0.0259179
241	0.0277778	-0.012939	-0.0194805
242	0.012844	0.0225989	-0.017316
243	-0.00182482	-0.00742115	0.00879121
244	-0.0145191	0.00749064	-0.0237581
245	0.0184502	-0.00925926	0.0334076
246	0.00917431	0.00934579	0.0446429
247	-0.0323741	-0.0111111	0
248	-0.00727273	0.00746269	0.0332594
249	0.0221811	0.0206767	0.00659341
250	0	-0.0111111	0.0043956
251	-0.0216606	0.011236	-0.0173536
252	-0.0234657	-0.0166052	0.010989
253	0.00182815	-0.0018622	-0.00219298
254	0.00732601	-0.00556586	0.0199115
255	-0.00364964	0.00934579	0.0266075
256	-0.0145191	0.0207156	0.0356347
257	0.00550459	-0.00925926	-0.00436681
258	-0.0235081	0.0150094	-0.0777311
259	0.0110092	0.00373134	-0.0043573
260	-0.0234657	-0.00742115	0.0110132
261	0	0.0168856	0.0289532
262	-0.0181159	-0.00740741	-0.0151515
263	0.0165746	0.00372439	0
264	-0.0145191	0.00560748	-0.0490405
265	-0.032316	0.00749064	-0.0344086
266	0.0277264	0.00747664	0.0424107
267	0.00732601	0.00186567	0.0110132
268	0.025878	0.0150094	-0.021645
269	-0.00909091	0.0150376	-0.0259179
270	0	0.0225989	0.0132159
271	0.00549451	-0.0147874	0.0199115
272	-0.00182482	-0.00371747	-0.0215983
273	-0.00364964	-0.012963	-0.0280778
274	0.0147059	-0.0238971	0
275	-0.0108893	0.011236	-0.0405983
276	-0.00547445	0.00747664	0.0266075
277	0.00732601	0.0150094	-0.0386266
278	-0.0163043	0	-0.0344086
279	0.0183824	-0.012939	-0.0280778
280	-0.0145191	-0.0147874	-0.0087146
281	0.00365631	-0.00185874	-0.0469083
282	-0.00546448	-0.00556586	-0.021692
283	-0.00909091	0.011236	-0.0087146
284	-0.0340502	-0.00742115	-0.0151844
285	0.035316	-0.00371747	0.0243902
286	-0.028777	0.018797	-0.0258621
287	-0.0198915	0.0340909	0.00657895
288	0.0165746	-0.0220588	-0.017316
289	0.0165746	0.0131086	-0.0043573
290	0.00550459	0.00560748	-0.0215983
291	0.0128676	0.00559701	-0.0238612
292	0.0128676	0.00747664	-0.0194805
293	0.0165746	0.0187617	-0.0130152
294	0.00550459	0.0359848	0.0702948
295	0.0110092	0.00934579	-0.0195228
296	0.00917431	0.00373134	-0.017316
297	-0.00547445	0.00559701	-0.0344086
298	0.0221811	-0.00557621	-0.0533049
299	0.00182815	-0.0148148	0.0220751
300	0.0128676	-0.0018622	0.046875
301	-0.00364299	-0.0018622	0.00877193
302	-0.0108893	-0.012939	-0.0238095
303	-0.00364299	-0.00371747	-0.0238095
304	-0.00182482	0.0150094	0.0494382
305	-0.0198915	0.0302457	0.0423163
306	0.0147059	0.0131086	-0.00655022
307	-0.0108893	0.00746269	0.0131868
308	-0.00182482	-0.012963	-0.0365591
309	0.00549451	-0.012963	-0.0344086
310	-0.0145191	-0.0383212	0.00877193
311	0.0221811	0.00747664	0.0043956
312	-0.0108893	-0.0184502	0.0560538
313	0.0184843	0.018797	0.010989
314	0.0202952	-0.00927644	0.0333333
315	0.0277778	-0.012963	0.0378619
316	-0.0163043	0.0302457	0.00877193
317	0.0448598	-0.0184162	0.00881057
318	-0.0252252	0.0131086	-0.00218341
319	-0.00182482	-0.0221402	-0.0108932
320	0.0165746	0.0131332	0.00438596
321	0.00182815	-0.00557621	0.00440529
322	-0.00728597	-0.0111111	0.0131868
323	0.0202952	0.0131086	-0.0553191
324	0.00732601	0.00186567	-0.0173536
325	0.0315399	0.00559701	0.0333333
326	0.014733	0.00560748	0.0356347
327	0.0147059	0.00373134	-0.0238095
328	-0.0198915	-0.0311927	-0.025974
329	-0.0251799	0.00559701	0.00879121
330	0.003663	-0.0275735	0.01766
331	-0.00727273	0.0206767	0.0402685
332	-0.0127042	-0.0147874	-0.059322
333	-0.0198915	-0.00556586	0.00438596
334	0.0221811	-0.0184843	0.00437637
335	0.014733	-0.00556586	0.0310421
336	-0.00909091	-0.00927644	0.0176991
337	0.0110092	-0.00925926	0.00879121
338	0.0128676	-0.00742115	-0.0130152
339	-0.0144928	-0.0111111	0.00218818
340	-0.00546448	-0.00927644	0.0154525
341	-0.0288288	0.011236	-0.00653595
342	0.00919118	-0.00924214	0.0493274
343	0.00732601	0.00186567	-0.0108696
344	-0.0216998	0.0093633	0.00218341
345	-0.0216606	-0.00742115	-0.0280172
346	-0.0180832	0.0245283	-0.0151844
347	0.0110294	0.00186567	-0.0699153
348	-0.0235081	0.0225564	-0.0281385
349	0.00365631	-0.0166052	-0.00218818
350	0.00732601	-0.0275229	0.0401786
351	0.014733	0.00560748	-0.00218818
352	0.0296296	0.00560748	-0.0258621
353	-0.0198556	-0.00371747	0.0132159
354	-0.0144928	0.011215	-0.0512821
355	-0.0216998	-0.0111111	-0.0323276
356	0.0146789	0.00559701	-0.00655022
357	-0.0180832	0.011236	0.0110132
358	0.00365631	-0.00927644	0.00879121
359	-0.0198915	0.0131086	-0.0194805
360	0.00365631	0.0150094	-0.0301724
361	-0.00182482	-0.00557621	0.0199115
362	0.003663	0.0169173	-0.0364026
363	0.035316	-0.0238971	-0.00436681
364	-0.00182482	-0.0184502	-0.0130435
365	-0.0180832	0.011236	0
366	-0.0341113	0.011215	-0.0215983
367	-0.0127042	0.0206767	-0.0173536
368	0.014733	-0.0275229	-0.0087146
369	-0.00364964	0.0206767	0.0198675
370	0.012844	-0.0111111	-0.0195228
371	-0.0144928	0.00373134	0.0221239
372	-0.027027	-0.0256881	-0.0194805
373	-0.00364299	0.00934579	-0.0238095
374	-0.0252708	-0.00371747	0.00438596
375	-0.0216606	0.0244821	-0.0152505
376	-0.0198915	-0.00185874	0.0176991
377	0.0240296	0	-0.00218341
378	0.0221402	-0.00556586	-0.0365591
379	0.014733	0.0244821	-0.0195228
380	0.00917431	0.0149813	0.00438596
381	-0.0252252	0.018797	-0.0343348
382	-0.00182149	-0.0147874	0.0265487
383	-0.0127042	0.011236	0.00438596
384	0.0110092	0.00559701	0.0154867
385	0.0277778	-0.00556586	0.0446429
386	-0.0163043	-0.00925926	0.049217
387	0.0165441	0.00559701	0.0311111
388	-0.00364964	0.0206767	-0.0130719
389	-0.027027	-0.00924214	-0.0387097
390	0	-0.00556586	-0.00869565
391	0.0147059	0.0168856	0.0110132
392	-0.00546448	0.018797	-0.0173536
393	-0.00909091	0.0206767	0.00877193
394	-0.00182482	-0.0111111	0
395	0	0.0150094	0.0288248
396	0.003663	-0.0111111	0.0154525
397	-0.00364964	-0.00556586	0.01766
398	0.0315399	0.0150094	-0.0087146
399	-0.028777	0	0.0110132
400	0.0165746	0.0018622	-0.017316
401	0.0183824	0	0.0243902
402	0.00182815	0	0.0154185
403	0.0429104	0.0150094	-0.0108932
404	0.025878	-0.00742115	0.00657895
405	0.00917431	-0.012939	-0.0302376
406	-0.0163339	0.011236	0.00219298
407	0.010989	0.0283554	-0.0108696
408	-0.00364299	0.00373832	0.0110132
409	0.003663	-0.00742115	0.0539326
410	0.00182815	-0.0275735	0.0198238
411	-0.00910747	0.00373134	-0.0614407
412	-0.00364964	0.0207156	0.0154525
413	-0.0127273	0.0168856	0.0288248
414	0	0.0360531	-0.0344828
415	-0.028777	0.00934579	0.0266075
416	0	0.0018622	-0.0259179
417	-0.0126812	0.00747664	-0.0173536
418	0.0165746	0.00747664	0.00877193
419	0.0277778	0	-0.0043573
420	0.0110497	-0.0257353	-0.0387097
421	0.0409683	-0.0166052	0.0132159
422	0.00917431	0.00373134	0.00659341
423	-0.00727273	-0.0111111	0
424	-0.00727273	0.0226415	-0.0366379
425	-0.0216606	-0.00556586	0.0110132
426	0.0240741	-0.00742115	-0.0173913
427	0.0202952	0.0340909	-0.00218818
428	0.0128676	-0.0311355	-0.00436681
429	0.0184502	-0.0147874	0.0043956
430	0.00365631	0.00747664	-0.0237581
431	0.00919118	-0.0018622	0.00657895
432	-0.0341113	-0.0147874	-0.0152174
433	0.0184502	-0.00185874	-0.0108932
434	-0.027027	0.0207156	0.00659341
435	0.0277778	-0.0166052	-0.00869565
436	0.00365631	-0.0111111	-0.0087146
437	-0.0127042	-0.00185874	0.0634921
438	-0.00182482	0.0225989	-0.0697674
439	0.00182815	0.0093633	-0.00873362
440	-0.00182482	-0.0110906	-0.00218818
441	0.0165746	-0.00925926	-0.00653595
442	-0.0445633	-0.00371058	0.00657895
443	0.00733945	0.00747664	-0.0152174
444	0.0371747	0.011236	-0.00218818
445	-0.0144928	-0.0184502	0.0243363
446	-0.0145191	-0.0110906	-0.0365591
447	-0.0234657	0.018797	-0.0195228
448	-0.0180832	-0.00371747	0.0198675
449	-0.00909091	0.0302457	-0.0151844
450	0.0202952	-0.00742115	-0.0259179
451	-0.0163339	0.0225564	-0.0344086
452	-0.00728597	-0.00185874	0.00657895
453	0	-0.0257353	0.0289532
454	-0.0180832	0.018797	-0.00218341
455	0.0165746	0	-0.00218341
456	0.00549451	0.0477099	-0.00653595
457	0.0128913	0.00185874	0.00438596
458	0	0.011215	-0.0130152
459	0.00915751	-0.00371747	-0.00869565
460	0.00550459	0.00560748	0
461	-0.0163043	0.0131332	0.00438596
462	-0.00182815	-0.0184502	0.0333333
463	-0.0234657	-0.012963	0.0221239
464	0.00365631	0.0244821	-0.0130435
465	-0.00728597	0.00560748	-0.017316
466	0.00549451	-0.0202578	0.0333333
467	0.00365631	-0.0166359	-0.0130435
468	0.00732601	0.0131332	0.0288248
469	-0.0127042	-0.0184502	0.00218341
470	0.0165746	-0.0184162	-0.0108696
471	0.0165746	0.0131332	-0.00653595
472	-0.00909091	0.0359848	-0.00437637
473	-0.00909091	0.0150094	-0.0280172
474	-0.0145191	-0.00925926	-0.00436681
475	-0.0127042	-0.0147601	0.00218818
476	0.0239852	0.0150094	-0.0087146
477	-0.00182149	0.0225564	0.00881057
478	-0.0163043	0.0018622	0.00657895
479	0.0277778	0.0206767	0.0198675
480	0.014733	0.0244821	0.00881057
481	0.00182815	0.0340909	0.0154185
482	-0.00364299	-0.0202578	0.00218818
483	-0.0127042	0.0168856	-0.0108696
484	-0.00907441	0.0340909	0.0266667
485	0.0184502	-0.00742115	-0.00655022
486	0.00733945	0.00934579	0.00659341
487	-0.00182482	0.00747664	0.0400891
488	-0.00727273	0.00559701	-0.0428266
489	0.00182482	-0.00185529	0
490	-0.00728597	-0.0111111	-0.00218818
491	-0.0323741	0.011215	-0.0151844
492	0.0110294	-0.00556586	-0.0280172
493	0.003663	-0.00742115	-0.00218341
494	0.00182482	0.018797	0.00438596
495	-0.0144928	-0.0329068	0.0110132
496	0	-0.0220588	0.0356347
497	-0.00909091	0.0131332	0.00877193
498	0.00732601	-0.0184502	-0.0194805
499	0	-0.0166052	-0.017316
500	-0.0357782	0.00934579	0
501	-0.00364964	-0.012963	0.0110375
502	-0.0127042	-0.00371747	0.0244444
503	-0.0163043	0.0283554	0.0494382
504	-0.0216998	-0.0383912	-0.0365591
505	0.0296296	0	-0.065678
506	-0.032316	-0.0111111	0.0043956
507	-0.00546448	-0.0202578	-0.017316
508	-0.0163043	-0.0220588	0.00219298
509	-0.00182149	-0.012939	0.0515695
510	-0.0127273	0.00747664	-0.0470085
511	0.0165746	-0.00742115	-0.0108932
512	-0.0323741	-0.0239411	0.0110132
513	-0.010929	-0.012939	0.00877193
514	-0.0252252	-0.00371747	-0.0301724
515	0.0166052	0	0.00657895
516	-0.00364299	0.0093633	-0.0130435
517	-0.00727273	-0.00371747	0.00219298
518	-0.00364299	0.0244821	0.0288889
519	-0.00364299	0.00373134	0.0110375
520	-0.0180832	-0.0111111	0.00879121
521	-0.00365631	0.0168856	-0.00653595
522	-0.0127042	0.0340909	-0.0151844
523	0.0110294	0.011236	-0.0108696
524	-0.0109091	0.0264151	-0.0301724
525	0.0390335	0.0244821	0.0176211
526	0.003663	0	-0.00218818
527	-0.00728597	0.011236	-0.0130435
528	-0.00182482	-0.00925926	0.0199115
529	-0.00364964	-0.0147874	-0.0323276
530	-0.0127042	-0.00371058	0.0424107
531	-0.0162749	0.0206767	0.0132159
532	-0.00182815	-0.0275735	-0.00436681
533	0.0221402	0.0168856	0.00659341
534	0.003663	-0.00185874	0.00438596
535	0.00732601	0	-0.0130435
536	0.0486891	0.0169173	-0.0152174
537	0.00182815	-0.0147601	-0.00869565
538	-0.0216606	-0.0166359	-0.0344086
539	0.0018315	-0.00185874	0
540	-0.0216606	-0.0202578	-0.0343348
541	0.00732601	-0.00371747	0.010989
542	-0.00727273	0.0225989	0.0288248
543	-0.0235081	-0.00556586	0.0132159
544	-0.00182482	0	-0.0087146
545	-0.0127042	0.011236	0.00657895
546	0.0202952	0.0340909	0.0199557
547	-0.00545455	0.011236	-0.0407725
548	0.0110294	-0.00185874	-0.0130152
549	-0.00909091	0.00934579	0.0110132
550	-0.00907441	0	0.00438596
551	-0.0198915	-0.00556586	0.00877193
552	0.0259259	0.00747664	-0.0364807
553	-0.0234234	0.018797	0.0311111
554	0.012844	0.0245283	0.0132159
555	-0.00546448	-0.0293578	-0.0108696
556	-0.00728597	0.011257	-0.00656455
557	-0.0108893	0.00934579	0
558	-0.0411449	-0.029304	-0.0387097
559	-0.0180832	-0.00371058	0.0379464
560	0	0.00373134	0.0131868
561	0.0240296	0	-0.0043573
562	0.00917431	-0.0183824	0.0110132
563	-0.00182815	0.011236	0.0266075
564	0.003663	0.0131332	-0.0280172
565	0.00732601	-0.0111111	0.00881057
566	0.0110294	0.0341556	0.0446429
567	-0.00364964	0.00934579	-0.0237581
568	-0.0145191	0.0206767	0.0356347
569	-0.0180832	0.00373134	-0.0387097
570	-0.0109091	0.0418251	0.0175824
571	0.012844	0.0321361	0.00438596
572	-0.0180832	0	-0.00873362
573	-0.00727273	-0.00185874	0.0110132
574	0.00549451	0.0130841	-0.0237581
575	0.00182815	-0.0184502	0.0333333
576	0.0315985	-0.0111111	0.00657895
577	0.00732601	0.011236	-0.0238095
578	-0.00547445	0.00559701	0.0311111
579	-0.00364964	0.00747664	0.00879121
580	0.00732601	-0.0220994	-0.0407725
581	-0.0252252	-0.00925926	-0.0512821
582	0.025878	0.030303	0.0154185
583	0.0128913	-0.00742115	-0.0087146
584	-0.0144928	0.0131332	-0.00437637
585	-0.0144928	-0.0238971	0.0311804
586	0.00182815	-0.0184843	0.00659341
587	0.003663	0.00373832	-0.00655022
588	-0.00727273	0.00372439	0.00879121
589	0.00732601	0.0150094	-0.00218818
590	0.0110294	-0.00927644	0.0221239
591	0.00182815	0	-0.00218341
592	-0.00364964	-0.0239411	0.010989
593	0.00182815	0.00747664	0.00219298
594	-0.028777	-0.0184502	0
595	0.0110294	0.00373134	0.00879121
596	-0.0216998	0.00560748	-0.0194805
597	0.014733	0.0150094	-0.0108696
598	0.00182815	0.00749064	-0.0130435
599	0	0.00186567	-0.0173536
600	-0.0198915	0.0131086	0
601	-0.0198915	0.0131086	0.0221729
602	-0.0198915	-0.0257827	-0.0321888
603	0.0221402	-0.00742115	-0.0173536
604	0.00182815	0.0131086	0.00657895
605	0	-0.0110906	0.0266075
606	-0.00909091	0.011236	0.00879121
607	0.00182815	0.00186567	0.0109649
608	0.0110294	-0.0147874	0.013245
609	0.0165746	-0.00742115	0.010989
610	0.0203327	0.00186567	-0.0130435
611	0.0128676	-0.0166052	0.00879121
612	-0.0162749	0.0169173	-0.0574468
613	-0.00909091	-0.00185874	-0.0087146
614	0.0277778	-0.0166052	0.0332594
615	-0.00182815	-0.00556586	0
616	-0.00182815	-0.00740741	0.00218818
617	-0.0216998	0.0225989	-0.0280778
618	0.00549451	-0.00740741	0.0266075
619	-0.0180832	-0.00742115	-0.0194805
620	0.0110294	0.00559701	0.0288889
621	0.0128676	0.0131332	0.0131868
622	-0.0323741	0.0187617	-0.0130719
623	0.012844	-0.0437158	-0.0301724
624	-0.0109091	-0.00371747	0.0110132
625	-0.00909091	-0.00556586	0.044843
626	-0.0341113	0.00934579	0.010989
627	0.0147059	-0.012939	-0.0280778
628	-0.00727273	-0.00371747	0.00218818
629	-0.0252708	-0.0311927	-0.0130152
630	0.0110092	-0.00927644	0.0266075
631	0	-0.00740741	-0.0152174
632	0.00182815	0.011236	0.0514541
633	0.003663	0.0244821	-0.0151515
634	0.0277778	0.00373134	0.0516854
635	-0.0181159	-0.0202578	0.00219298
636	-0.00728597	0.0301887	0.0355556
637	0.00733945	0.018797	0.0221729
638	0.0110092	0.00559701	0.0221729
639	0.0128676	0.00747664	-0.0237581
640	-0.039356	-0.00557621	0.0154185
641	-0.00546448	-0.00927644	-0.0344086
642	0.0221811	-0.00556586	0.0043956
643	-0.0108893	-0.0347985	-0.0406852
644	-0.0252708	0.011236	0.01766
645	-0.00364299	-0.00742115	0.0288248
646	0.00549451	0.0169173	0.00877193
647	-0.00727273	0.00373832	-0.0087146
648	-0.0305755	-0.0221402	-0.0323276
649	0.0277778	0.00186567	-0.00655022
650	-0.0163043	-0.00371747	-0.0174292
651	-0.00546448	-0.0018622	0.0310421
652	0.0165746	-0.00185874	-0.010846
653	0.00549451	-0.0166359	0.0333333
654	-0.0108893	0	0.00659341
655	-0.0145191	0.0225989	-0.021692
656	-0.0234657	-0.00743494	0.0198675
657	-0.0127042	0.00934579	0.00879121
658	0.0165746	0.00747664	-0.0280778
659	0.0202952	-0.00371747	-0.0151844
660	-0.00910747	0.0535373	-0.0195228
661	-0.00364964	0.0168856	-0.0697674
662	0.0128676	0.0225989	0.0110132
663	0.00365631	0.0283019	-0.0130435
664	-0.0253165	-0.0202578	0.0355556
665	0.0202952	-0.0220588	-0.0152174
666	0.0165746	-0.0275735	-0.00655022
667	0.0240296	-0.00927644	0.00877193
668	0.0334572	0.00747664	0.0401786
669	-0.00909091	0	0.0288248
670	-0.0127273	-0.00557621	0
671	-0.00907441	-0.0220994	-0.0130435
672	-0.00727273	0.018797	0.0333333
673	-0.0198915	0.0207156	0.013245
674	0.00182815	-0.00927644	0.0561798
675	0.00919118	-0.012939	0.00881057
676	-0.0199275	0.0149813	-0.021645
677	0.0240296	-0.0166052	-0.0108696
678	0.0128676	-0.0147874	-0.010846
679	0.0240741	-0.0220994	0.0357143
680	-0.00729927	0.00934579	-0.0323974
681	0.0110497	-0.00371747	0.0266075
682	-0.0323741	-0.012963	-0.0238095
683	-0.0181159	0.0018622	0.0220751
684	-0.00909091	0.011236	-0.0280778
685	0	-0.0147874	-0.0344828
686	0.00732601	-0.00371747	0.0334076
687	0.0018315	0.0283019	0.0243363
688	-0.0305755	-0.00925926	-0.0043573
689	0.014733	0.0188324	-0.0173536
690	-0.0109091	0.0206767	-0.0344086
691	-0.0163043	0.0093633	-0.0108696
692	0.00182482	-0.0329068	0.00218818
693	0.0165746	-0.0257353	0.0131868
694	0.00549451	0	0.0288889
695	-0.0109091	-0.0018622	0
696	-0.0108893	0.00372439	-0.00436681
697	-0.00364964	0.018797	0.0132159
698	0.00182482	-0.0238971	0.00438596
699	0.0239852	0.0093633	-0.0087146
700	0.0202578	-0.0311927	0.0199115
701	0.0128676	-0.00927644	0.0311111
702	0	0.00559701	0.0515695
703	0	-0.0147874	-0.00218818
704	-0.00546448	0.0302457	0.00657895
705	0.003663	0.0131086	-0.0301075
706	0.00182815	0.011236	0.0608108
707	0.00732601	0.0225989	0.0043956
708	0	-0.0311355	0.0199115
709	-0.0181159	-0.012963	0.010989
710	-0.00727273	-0.00927644	0.0243363
711	-0.00728597	0.011257	0.00657895
712	-0.00364964	-0.0147874	-0.00218818
713	-0.0145191	0.00373134	-0.0151844
714	0.0202952	-0.0018622	0.00659341
715	0	0	0.00437637
716	0	-0.00371058	-0.0173536
717	0.0147059	-0.0347349	-0.025974
718	-0.0288288	0.00560748	0.0288889
719	0.0110092	-0.0111111	0.0043956
720	0.0221811	0.0018622	-0.0173913
721	-0.00728597	-0.00185874	-0.0130152
722	0.00549451	0.00746269	0.0199115
723	-0.00182482	0.0283019	0.0198675
724	-0.0127042	-0.0147874	0.0401786
725	-0.0252252	0.018797	-0.021645
726	0.025974	0.011215	0.00218818
727	-0.00728597	0.011215	0.0311111
728	0.00917431	-0.0184502	-0.00218818
729	0	-0.0238971	-0.00655022
730	0.0296296	-0.0275735	-0.0087146
731	-0.0198915	-0.00556586	-0.0344086
732	0.00365631	0.0264151	-0.0151844
733	0.0166052	0.0093633	-0.0301724
734	-0.00364964	0.0283019	0.0267261
735	-0.027027	0.00747664	0.00659341
736	0.0165746	-0.0166052	0.0447427
737	-0.00546448	0.0187617	-0.00869565
738	0.0220994	-0.012963	-0.00873362
739	0.0203327	-0.00372439	-0.0281385
740	-0.0127042	-0.0129151	0.0154525
741	-0.00364964	-0.012963	0.0377778
742	0.0409683	-0.00927644	0.0154525
743	0.0429104	0.0018622	-0.0173536
744	0.00182815	-0.0148148	0
745	0.00919118	0.00373832	0.0266075
746	-0.00907441	-0.0202952	-0.0108696
747	0.00549451	0.0187617	0.0333333
748	-0.00727273	-0.00556586	0.0198238
749	0.014733	0.0418251	-0.0215983
750	0.0166052	0.0360531	-0.0259179
751	0.00548446	0	-0.00436681
752	0	-0.0257353	0.0132159
753	-0.00364299	-0.012939	0.00657895
754	0.014733	-0.0202578	0
755	-0.00182482	0.011236	-0.00653595
756	0.003663	-0.00372439	0.0288889
757	0.00915751	-0.0220994	0.0265487
758	-0.0199275	-0.0111111	0.00438596
759	-0.0216606	0.011236	0.010989
760	0.00919118	-0.0111111	0.0356347
761	0.00733945	0.0169173	0.0243902
762	-0.0109091	0.0284091	-0.0130435
763	0.0110294	0.011236	0
764	0	-0.0147874	0.00877193
765	0.0296846	0.00373832	0.0378619
766	-0.0144928	0.00747664	-0.00652174
767	0.00733945	0.0245283	0.0470852
768	0.00549451	0.0168539	-0.0322581
769	-0.0269784	0.00934579	0.0132159
770	-0.00182482	0.039924	0.00438596
771	0.00549451	-0.00742115	0.00218818
772	0.00732601	-0.0220994	-0.00218341
773	0.00365631	0.0225989	-0.00869565
774	-0.00546448	0.018797	0.0653153
775	0.0110092	-0.00743494	-0.00436681
776	0.0128676	-0.0184502	0.010989
777	-0.0412186	-0.029304	0.0132159
778	-0.00364964	-0.00371747	0.00437637
779	-0.00728597	-0.00742115	-0.0195228
780	0.00732601	-0.0202952	-0.0280172
781	0.003663	0.00373134	-0.0152174
782	-0.0376344	-0.0184502	0.00879121
783	0.00919118	-0.0018622	0.0132159
784	0.0110294	-0.00740741	0.0176211
785	-0.00727273	0.0264151	0.0446429
786	0.0333952	0.0244821	-0.0533049
787	-0.0109091	-0.0257353	0.0311804
788	-0.00909091	-0.00927644	0.00659341
789	-0.0234657	0.00560748	0.0154525
790	-0.00182482	0.018797	-0.0237069
791	-0.00364964	-0.0184843	-0.0321888
792	0.00182815	0.011236	-0.0130435
793	0.003663	-0.00742115	0.0154525
794	-0.00728597	-0.0018622	-0.0130435
795	-0.00909091	0.00747664	-0.00219298
796	0.0128676	0.0150094	-0.00436681
797	-0.00909091	0.0244821	0.0220751
798	0.00732601	0.0283554	-0.0237581
799	0	0.00373134	0.0311111
800	-0.027027	-0.00371747	-0.00217865
801	0.0240296	-0.0329068	0.0154525
802	0.00549451	-0.0202578	-0.00218341
803	-0.00364299	-0.00925926	-0.0043573
804	-0.00547445	-0.00185874	0.0333333
805	-0.00546448	0.011236	-0.021645
806	-0.00546448	0.00934579	0
807	0.00549451	0.00186567	0.0266075
808	0.00365631	-0.012963	0.00877193
809	-0.00182482	0.0206767	-0.0386266
810	0.00182815	-0.0220588	-0.0130435
811	0.0147059	-0.0256881	-0.0344828
812	0.0110497	0.0130841	0.0400891
813	-0.00909091	0.0206767	0.0154525
814	0.00549451	0.0359848	-0.0195228
815	-0.00546448	0.00372439	-0.017316
816	0.0184502	-0.0166052	0.00877193
817	0.0221811	-0.0311355	0.0153846
818	-0.0127273	0.026465	-0.0322581
819	-0.00546448	0.0150094	0.0199115
820	0.0110294	-0.00925926	-0.00873362
821	-0.0162749	0.00747664	0.0154185
822	0.00549451	-0.0111111	0.00219298
823	0.0166052	-0.012963	0.0221729
824	-0.00727273	-0.0111111	0.00219298
825	-0.0145191	-0.0274725	0.00218818
826	0.0018315	-0.0147874	0.00879121
827	0.0110294	0.00747664	-0.00655022
828	0.0202952	0.00373134	0.0288248
829	0.00550459	-0.0111111	-0.0108932
830	0	0.011257	-0.017316
831	-0.00728597	0.0264151	0.0539326
832	-0.00363636	0.00559701	-0.0470085
833	-0.0127273	0.0131332	-0.0322581
834	-0.0162749	-0.0400729	0.0243363
835	-0.0181159	0.0150094	-0.0259179
836	0.0203327	-0.0202952	-0.0043573
837	0.00919118	-0.0202578	-0.0151844
838	0.0147059	-0.0220588	-0.025974
839	0.00182815	-0.00743494	0.0288248
840	-0.00909091	-0.00742115	-0.0043573
841	-0.0323741	0.0283554	0.0514541
842	0.00549451	0	0.0243902
843	0	0.0131086	-0.0344086
844	0	0.0018622	0.0154525
845	-0.00907441	0.0018622	0.0132159
846	0.00917431	0	0.0243902
847	-0.00909091	-0.00556586	-0.00869565
848	0.0184162	-0.00372439	0.0288889
849	0.0128676	-0.0018622	-0.010846
850	-0.00182482	-0.0257353	-0.0195228
851	-0.0108893	0.00373134	0
852	-0.00364964	-0.0275735	0.00659341
853	-0.0144928	-0.0220994	0.010989
854	-0.0252252	-0.012939	0.00659341
855	0.0240296	0.0150094	-0.0470085
856	0.0239852	0	-0.0237581
857	-0.00182482	0.018797	0.0243363
858	0.003663	0.0264151	0
859	-0.0252708	0.011215	-0.0194805
860	0.00365631	-0.0166052	0.0288248
861	-0.00728597	0.00559701	-0.0387097
862	-0.0109091	0	0.0425056
863	0.025878	0.0225989	-0.021645
864	-0.0144928	-0.00185874	-0.0195228
865	0.014733	0.0264151	0.0154867
866	-0.0180832	-0.00925926	-0.0615711
867	-0.0109091	0.0168856	-0.0449679
868	-0.0198915	-0.0110906	0.0154525
869	0.00182815	-0.00556586	0.0043956
870	-0.0163043	0.0168856	-0.0365591
871	-0.00546448	0.0150094	0.0356347
872	0.00917431	0.00934579	0.0243902
873	-0.00182482	-0.00371747	0.013245
874	0	-0.00556586	0.0469799
875	-0.0234657	-0.0111111	0.049217
876	0.00548446	-0.00185874	-0.0552017
877	-0.0144928	-0.00556586	0.0266075
878	-0.00364964	-0.00557621	0.0470852
879	-0.0288288	0.011236	-0.0130152
880	0.0221811	-0.0110906	-0.00218818
881	-0.0109091	-0.0311355	0.00659341
882	-0.00182482	-0.0111111	0.0266075
883	0.0165441	0.0018622	0.0198675
884	-0.00182815	0.00560748	-0.027957
885	-0.0306306	-0.00371747	-0.0280778
886	-0.00728597	0.0150094	0.00657895
887	0.0221402	0.00373134	0
888	0.0165746	0.00559701	-0.0238095
889	0.00365631	-0.012963	0.0154185
890	-0.0163339	-0.012939	0
891	-0.0108893	0.00934579	0.0154185
892	0.00917431	-0.00555556	0.0379464
893	0.0165746	-0.0220994	-0.027957
894	-0.0180832	-0.0202578	-0.0238612
895	0	0.011236	0.00437637
896	-0.0198556	-0.0018622	0.0154525
897	-0.00909091	-0.00927644	0.0198675
898	-0.0181159	-0.0184502	0.0266667
899	-0.00909091	0.0206767	0.0356347
900	-0.00727273	-0.00371747	-0.0344828
901	0.00365631	0.018797	0.00438596
902	0.0277778	0.00186567	-0.0152174
903	-0.00182482	0.00747664	0.0110132
904	0.0128676	0.0168856	-0.025974
905	-0.00364964	-0.00742115	-0.0323276
906	0.00549451	0.00747664	-0.0280172
907	-0.0109091	-0.0018622	-0.042735
908	0.0296846	0.0150094	0.00879121
909	-0.0163339	0.011236	0.0198675
910	-0.00546448	0.00186567	0
911	0.0240296	0.011236	0.00219298
912	-0.0180832	-0.00557621	0.00660793
913	0.0128676	-0.00371747	0
914	0.025878	0.0379507	0.013245
915	-0.0198915	0.00373134	-0.0447761
916	-0.0216998	-0.0110906	-0.0151844
917	0.0221811	-0.0220994	0.0199557
918	-0.0145191	-0.0147601	0.0561798
919	0.00917431	0	-0.0173536
920	0.0110294	0.0283019	-0.0531915
921	-0.00728597	-0.00740741	0.0198675
922	0.00733945	-0.00557621	0.0198675
923	0.0410448	0.0302457	0.00656455
924	0	-0.0220994	0.0154185
925	-0.00364964	0.0302457	0.0424107
926	0.00732601	-0.00742115	-0.0173913
927	0.0409683	0.011215	0.00879121
928	0.0165441	0.0018622	-0.0428266
929	0.0429104	0.0150094	0.013245
930	0.0221402	-0.00742115	-0.00217865
931	0.025878	-0.00742115	0.0154185
932	0.00733945	-0.0257353	0
933	0.003663	-0.0147874	0.0355556
934	0.0165746	0.0093633	0.00881057
935	0.0165746	-0.00556586	-0.00436681
936	0.00732601	-0.00742115	-0.00873362
937	-0.0108893	-0.0238971	-0.0108696
938	-0.0109091	-0.0166052	0.00657895
939	0.0110294	0.0169173	0.0447427
940	-0.00728597	0.00186567	0.013245
941	-0.0163043	0.0302457	0.0154867
942	-0.0216606	-0.00372439	0.00659341
943	0.00915751	0.00747664	0.0401786
944	-0.00546448	0.0169173	0.0243902
945	-0.0127042	0.00560748	0.00437637
946	0.0240296	-0.0184162	0.0110132
947	0.0018315	0.0149813	0.00218341
948	0.014733	-0.0018622	-0.0194805
949	0.0128676	-0.0018622	0
950	0.0184162	0.00373134	-0.0173913
951	0.014733	-0.0455373	-0.0194805
952	0.0202952	0	-0.0173536
953	-0.0127042	-0.0220588	0.0198675
954	-0.0198556	0.011236	0.0266667
955	-0.0127042	-0.0147874	0
956	0.00182815	-0.00927644	-0.021645
957	-0.00182482	0.00747664	0.0177384
958	-0.0145191	-0.0202952	-0.0406852
959	-0.00909091	-0.0311355	-0.0259179
960	-0.0109091	-0.00742115	0.0333333
961	-0.00909091	-0.0166052	0.0356347
962	0.0147601	0.00373832	0.01766
963	0.0240296	-0.00743494	0
964	-0.0234657	0.00186567	0.00438596
965	0.0259259	-0.00557621	-0.00869565
966	-0.0108893	-0.00371747	-0.0043573
967	0.00732601	0.0226415	0.0153846
968	0.014733	0.00934579	-0.00218818
969	-0.0127042	0.0018622	-0.00436681
970	0.00365631	-0.0111111	-0.00218818
971	-0.00182482	0.0131086	-0.0043573
972	0.00735294	0.00373134	0.01766
973	-0.00728597	0.00746269	-0.00217865
974	0.0110294	0.00186567	0.0199115
975	-0.0198915	-0.0257353	0.0311111
976	-0.00364964	0.0131086	-0.0258621
977	-0.0288288	0.0264151	-0.0151515
978	-0.00910747	-0.0184502	-0.00655022
979	-0.00727273	-0.0202578	0.0356347
980	-0.00182149	-0.0184502	0.00218818
981	-0.028777	0.018797	0.0311111
982	0.0110092	-0.0202578	0.0356347
983	-0.00909091	-0.012939	-0.0043573
984	-0.00364964	0.00559701	0.00219298
985	0.0315399	0.0206767	0.00660793
986	0.0165746	-0.0111111	0.0132159
987	0	-0.00557621	0.0401786
988	-0.00728597	-0.0110906	-0.0406852
989	-0.0108893	-0.00925926	-0.0108696
990	0.0371747	0.0149813	-0.00218818
991	0.00917431	0	0.00881057
992	-0.027027	0.011236	-0.0280172
993	-0.0216998	-0.0184502	0
994	-0.00909091	-0.00925926	-0.00655022
995	0.0147059	0.0379507	-0.0173536
996	-0.00545455	0.0244821	-0.00217865
997	0.0296296	0.00747664	0.010989
998	0.00917431	0.00373134	-0.0280172
999	0.0128676	0.0226415	0.0266667
1000	-0.00182815	-0.0111111	0.0131868

## Sheet: 4
INSIGHT negative control (INT3).
	no CpG filtering													human CpG filtering													ancestral CpG filtering
simulation	rho	eta	gamma	Dp	Pw	alpha	tau	rho S.E.	eta S.E.	gamma S.E.	rho logl	eta logl	gamma logl	rho	eta	gamma	Dp	Pw	alpha	tau	rho S.E.	eta S.E.	gamma S.E.	rho logl	eta logl	gamma logl	rho	eta	gamma	Dp	Pw	alpha	tau	rho S.E.	eta S.E.	gamma S.E.	rho logl	eta logl	gamma logl
1	0.108571	0	0.708652	0	2.97378	0	0.079452	0.033083	0.370498	0.149662	13.4	0	4.8	0.022875	0	0.000781	0	0.000457	0	1.8e-05	0.03201	2.11816	1.44012	1.6	0	0	0.194885	0	0.906565	0	5.33946	0	0.179953	0.04449	0.283518	0.103428	17.4	0	13.2
2	0.169054	0	0.769401	0	5.04216	0	0.135347	0.035962	0.257345	0.091727	29.6	0	14.4	0.100615	0	0.929876	0	2.38284	0	0.094225	0.063128	0.718662	0.184292	6.2	0	5	0.212509	0	0.981362	0	6.29893	0	0.209377	0.052991	0.298101	0.095286	20.8	0	18.6
3	0.151378	0	0.910434	0	5.30618	0	0.139714	0.035926	0.286121	0.095331	20.2	0	15.6	0.043929	0	1.16837	0	1.3018	0	0.050949	0.047089	1.22765	0.4876	1.4	0	1.4	0.183016	0	0.851692	0	4.73105	0	0.160222	0.04925	0.323687	0.111972	16	0	10.4
4	0.129587	0.140981	0.794907	0.102114	3.98201	0.020558	0.105822	0.056381	0.460764	0.127721	13.8	0.2	7	0.035449	0	0.505493	0	0.457453	0	0.018239	0.052146	1.68499	0.826771	1.4	0	0.2	0.155684	0	0.791063	0	3.73797	0	0.127297	0.044933	0.353212	0.135752	12.2	0	6.2
5	0.092812	0	0.495496	0	1.78492	0	0.048247	0.034586	0.445422	0.226421	16	0	1.8	0.075124	0	0.777641	0	1.48984	0	0.059412	0.048102	0.736777	0.267475	3.8	0	1.8	0.16929	0	0.879173	0	4.5066	0	0.151943	0.04594	0.330576	0.119632	13.2	0	9.4
6	0.11119	0	0.551565	0	2.38087	0	0.064547	0.033308	0.362707	0.173154	20.2	0	3.2	0.032012	0	0.000105	0	8.6e-05	0	3e-06	0.030067	1.47421	0.974068	3.2	0	0	0.302314	0	0.910431	0	8.35814	0	0.282896	0.051899	0.207067	0.066312	44.4	0	34.8
7	0.134615	0	0.873719	0	4.53663	0	0.119649	0.042569	0.374151	0.108793	16.2	0	11.4	0.0343	0.003208	0	0.000512	0	0.000114	0	0.026081	1.49238	0.749068	3.8	0	0	0.120107	0	0.671006	0	2.45329	0	0.083908	0.047788	0.477871	0.198385	9	0	2.6
8	0.092023	0	0.479417	0	1.71429	0	0.046337	0.040479	0.519936	0.255431	16.2	0	1.6	0.012587	0	1.39106	0	0.444148	0	0.017424	0.04197	3.83417	2.09886	0.2	0	0.2	0.13792	0	0.512496	0	2.16723	0	0.075779	0.047587	0.41398	0.206647	17.8	0	2
9	0.054981	0	0.346822	0	0.73835	0	0.019779	0.034029	0.736343	0.45156	7.8	0	0.2	0.108573	0	0.943281	0	2.60584	0	0.10305	0.048221	0.513942	0.170821	7.4	0	6	0.235997	0	0.760699	0	5.48461	0	0.190268	0.046493	0.241469	0.091128	31	0	14.4
10	0.165892	0	0.703617	0	4.53739	0	0.12276	0.042019	0.300566	0.104434	32.4	0	11.8	0.096166	0.259988	0.846673	0.116707	2.076	0.026918	0.08264	0.073331	0.712898	0.205531	3.8	0	2.2	0.166429	0	0.867354	0	4.36962	0	0.147612	0.045094	0.33333	0.122218	12.8	0	8.8
11	0.153187	0	0.735493	0	4.37062	0	0.117426	0.046539	0.357604	0.111936	25.8	0	10.8	0.073065	0	1.18429	0	2.18907	0	0.085381	0.041853	0.66571	0.291098	4	0	4	0.123647	0	0.614688	0	2.31627	0	0.079807	0.045247	0.445583	0.20145	11.2	0	2.4
12	0.112695	0	0.587311	0	2.56871	0	0.069415	0.036074	0.382989	0.169532	19	0	3.6	0.088369	0.595355	0.664727	0.245823	1.50019	0.054562	0.060535	0.073659	0.59726	0.311387	3.4	0.2	0.4	0.212152	0	0.62155	0	4.06057	0	0.143375	0.052736	0.296051	0.122113	33.6	0	8
13	0.141587	0	0.546847	0	3.01797	0	0.082735	0.039431	0.331479	0.148163	33.6	0	5	0.008544	0	1.1325	0	0.245763	0	0.009665	0.054396	7.31366	2.48115	0	0	0	0.168265	0	0.68426	0	3.51494	0	0.121597	0.046102	0.333368	0.137494	18	0	5.8
14	0.086404	0	0.727773	0	2.42772	0	0.064397	0.033719	0.468926	0.185843	8	0	3.2	0.011106	0	2.20577	0	0.620611	0	0.024173	0.04377	4.54033	5.2311	0.6	0	0.6	0.124679	0	0.789033	0	2.98177	0	0.101033	0.045641	0.445068	0.170605	7.8	0	3.8
15	0.096244	0	0.78561	0	2.91744	0	0.077204	0.036642	0.452715	0.160485	9	0	4.6	0.12236	0.23384	0.979167	0.133032	3.04571	0.031573	0.120117	0.072292	0.565411	0.153467	6.6	0.2	5.8	0.154339	0	0.892125	0	4.15976	0	0.140021	0.045001	0.359624	0.131221	10.4	0	7.6
16	0.042946	0	6.1e-05	0	0.000102	0	3e-06	0.02348	0.941823	0.566933	9.6	0	0	0.027864	0	0	0	0	0	0	0.021684	1.64119	0.821309	2.4	0	0	0.213613	0	0.882566	0	5.71963	0	0.193378	0.051242	0.287741	0.09478	21.6	0	15.4
17	0.109626	0.000204	0.646896	0.000125	2.75101	2.5e-05	0.073773	0.053976	0.577346	0.194769	15.8	0	4.2	0.083258	0	0.381439	0	0.817152	0	0.033482	0.041998	0.586532	0.357248	10.8	0	0.6	0.243885	0	0.915335	0	6.76155	0	0.227943	0.048255	0.240426	0.082328	28.4	0	22.2
18	0.15076	0	0.640891	0	3.76187	0	0.102151	0.042923	0.337336	0.126799	30.6	0	8	0.017595	0	0.751892	0	0.336077	0	0.013288	-1	-1	-1	0.2	0	0.2	0.133138	0	0.489945	0	1.99928	0	0.069982	0.045301	0.414625	0.214663	17.4	0	1.6
19	0.081003	0	0.531381	0	1.66614	0	0.044742	0.033057	0.49366	0.24337	11.2	0	1.6	0.066425	0	1.05277	0	1.77453	0	0.069686	0.042761	0.744503	0.289143	2.8	0	2.6	0.24277	0	0.813148	0	6.02699	0	0.206788	0.053693	0.264368	0.086493	30.6	0	17.6
20	0.10472	0	0.343096	0	1.4021	0	0.038583	0.036483	0.415274	0.24801	29.4	0	1	0.012013	0	5.17725	0	1.55703	0	0.059222	-1	-1	-1	7.4	0	7.4	0.261874	0	0.85198	0	6.79019	0	0.232109	0.049073	0.227491	0.077771	34.4	0	22.6
21	0.115195	0	0.544046	0	2.4391	0	0.066146	0.044112	0.451511	0.195598	22	0	3.2	0.006156	0	0.069234	0	0.010834	0	0.000429	-1	-1	-1	0	0	0	0.196664	0	0.937525	0	5.5798	0	0.186671	0.053455	0.322948	0.10213	17.8	0	14.6
22	0.146765	0	0.694531	0	3.95769	0	0.106718	0.040982	0.331958	0.118796	25.6	0	8.8	0.064934	0	0.709609	0	1.17628	0	0.046964	0.047959	0.84854	0.332005	3.2	0	1.2	0.160557	0	0.846946	0	4.12139	0	0.139409	0.046639	0.352855	0.127851	12	0	7.6
23	0.159268	0	0.564366	0	3.51104	0	0.096587	0.043827	0.325119	0.13597	41.2	0	7	0.06615	0	1.31126	0	2.18924	0	0.08499	0.03989	0.702251	0.360326	4.4	0	4.4	0.127666	0	0.996089	0	3.82871	0	0.127231	0.045458	0.436534	0.159163	7.2	0	6.6
24	0.128925	0	0.589994	0	2.9593	0	0.08031	0.038254	0.353218	0.151371	25	0	4.8	0.000581	0	6.99218	0	0.102885	0	0.004048	-1	-1	-1	0	0	0	0.185642	0	0.777878	0	4.39746	0	0.150618	0.048897	0.316935	0.115837	18	0	8.8
25	0.157145	0	0.758817	0	4.61999	0	0.123942	0.037645	0.287807	0.100547	25.8	0	11.8	0.050392	0	1.55147	0	1.97309	0	0.076068	0.060256	1.36696	0.814729	4	0	4	0.215275	0	0.84258	0	5.50452	0	0.187749	0.044461	0.256431	0.094997	22.6	0	14.4
26	0.170152	0	0.650944	0	4.31554	0	0.117753	0.045287	0.314513	0.113242	38.2	0	10.6	0.087486	0	0.765093	0	1.70701	0	0.068339	0.041429	0.552072	0.22694	5.4	0	2.6	0.105985	0	0.848216	0	2.71577	0	0.091368	0.04858	0.565214	0.195179	5	0	3.2
27	0.133399	0	0.638859	0	3.30623	0	0.089537	0.032752	0.300697	0.129882	23.8	0	6	0.004778	0	0.030975	0	0.003763	0	0.000149	-1	-1	-1	0	0	0	0.18379	0	0.781887	0	4.37029	0	0.149704	0.04514	0.301244	0.115429	17.8	0	8.8
28	0.165068	0	0.600444	0	3.86467	0	0.106113	0.039861	0.287868	0.118457	40.4	0	8.4	0.092221	1e-05	1.15675	4e-06	2.70126	1e-06	0.105156	0.06583	0.815267	0.253639	6.2	0	6.2	0.183745	0	1.03664	0	5.73446	0	0.189204	0.052563	0.339813	0.113205	16	0	15.2
29	0.056728	0	0.00753	0	0.016606	0	0.000453	0.036749	0.829363	0.653487	16.8	0	0	0.1208	0.449892	0.825707	0.254838	2.54528	0.058215	0.101891	0.071829	0.479706	0.167402	4.8	0.2	2.4	0.1286	0	0.854266	0	3.32454	0	0.111957	0.045764	0.431133	0.159318	7.6	0	5
30	0.07132	0.005369	0.632594	0.002133	1.74598	0.000412	0.046331	0.057033	0.93027	0.319105	6.6	0	1.6	0.070974	4e-06	0.906253	1e-06	1.63843	0	0.064751	0.064932	1.04706	0.263106	3	0	2.2	0.231588	0	0.934211	0	6.53385	0	0.2197	0.044187	0.239401	0.086847	24.8	0	20.2
31	0.089236	0	0.738999	0	2.54625	0	0.067518	0.034592	0.464231	0.17894	8.4	0	3.4	0.000578	0	4.92538	0	0.07219	0	0.002842	-1	-1	-1	0	0	0	0.219158	0	0.730603	0	4.89615	0	0.170164	0.047399	0.263889	0.101106	28	0	11.4
32	0.151999	0	0.703874	0	4.15202	0	0.112031	0.038249	0.301251	0.110866	27	0	9.8	0.026662	0	0.498943	0	0.339024	0	0.013483	0.039745	1.71719	0.959167	0.8	0	0.2	0.133153	0	0.899347	0	3.61384	0	0.121377	0.045519	0.423321	0.151984	7.8	0	5.8
33	0.117232	0	0.546945	0	2.49346	0	0.067716	0.036871	0.374934	0.17334	22.8	0	3.4	0.071656	0.873304	0.952456	0.292384	1.73014	0.06315	0.068482	0.074811	0.64554	0.26004	0.6	0.4	0.6	0.055067	0	0.848211	0	1.40692	0	0.047102	-1	-1	-1	1.2	0	0.8
34	0.183723	0	0.655135	0	4.69198	0	0.128506	0.038069	0.248351	0.096761	44.8	0	12.8	0.021299	0	0.009147	0	0.004979	0	0.000199	0.04078	2.53768	1.91619	1.4	0	0	0.188209	0	0.663047	0	3.82831	0	0.133241	0.058659	0.367125	0.136406	23.8	0	7
35	0.121758	0	1.05521	0	4.92537	0	0.127623	0.036004	0.354767	0.123595	13.6	0	13.2	0.053636	0	0.42648	0	0.585084	0	0.023601	0.039514	0.858752	0.511948	4	0	0.2	0.206521	0	0.806746	0	5.0673	0	0.173536	0.04561	0.27078	0.10096	22	0	12.2
36	0.139827	0	0.610381	0	3.31967	0	0.090265	0.036904	0.316499	0.133572	28	0	6.2	0.126402	0.000679	0.765739	0.000402	2.4794	9.8e-05	0.099745	0.069146	0.624342	0.174079	11.6	0	5.4	0.142045	0	0.737385	0	3.18259	0	0.1088	0.044846	0.387862	0.155041	11.2	0	4.6
37	0.094439	0	0.600205	0	2.19663	0	0.058907	0.034163	0.435171	0.195007	12.8	0	2.6	0.058068	0	0.565672	0	0.8395	0	0.033697	0.043988	0.87393	0.42648	3.4	0	0.6	0.075592	0	0.890463	0	2.02668	0	0.067874	-1	-1	-1	2.4	0	1.8
38	0.094322	0	0.620803	0	2.26442	0	0.060727	0.032852	0.42334	0.188547	12.2	0	2.6	0.04839	0	0.001101	0	0.001371	0	5.6e-05	0.036763	1.0122	0.781719	7.6	0	0	0.1054	0	0.340201	0	1.09844	0	0.038537	0.0473	0.549455	0.331552	15.4	0	0.4
39	0.130537	0	0.640094	0	3.24368	0	0.087675	0.041673	0.378262	0.145273	22.6	0	5.6	0.038059	0	0.042106	0	0.041005	0	0.001663	0.049407	1.58185	1.26045	4.4	0	0	0.224501	0	0.890577	0	6.05997	0	0.20497	0.048277	0.261088	0.089871	23.6	0	17.4
40	0.088983	8.6e-05	0.527413	4.3e-05	1.8223	8e-06	0.048991	0.053832	0.707899	0.297548	13.6	0	1.8	0.112847	0	0.880075	0	2.53199	0	0.100676	0.052405	0.535228	0.166215	8.2	0	5.6	0.172691	0	0.837284	0	4.38159	0	0.148772	0.044291	0.316678	0.119061	14.6	0	9
41	0.105322	1e-06	0.494367	0	2.02737	0	0.054996	0.05154	0.572082	0.257056	20.8	0	2.2	0.149542	0.160682	0.792322	0.112305	3.03412	0.027477	0.122283	0.070678	0.479694	0.141276	12.6	0	6	0.178673	0	0.720858	0	3.92858	0	0.135559	0.046845	0.318956	0.125454	18.6	0	7
42	0.095095	0	0.492968	0	1.82063	0	0.049253	0.034236	0.431719	0.220114	16.8	0	1.8	0.223707	0.614584	0.763963	0.641917	4.39421	0.150459	0.180431	0.06702	0.223834	0.096815	17	2.6	6	0.162499	0	0.578214	0	2.87969	0	0.100873	0.045508	0.341981	0.158966	21.2	0	3.8
43	0.057497	0	0.523269	0	1.16136	0	0.030934	0.034631	0.726232	0.355999	5.6	0	0.6	0.091291	0	0.84086	0	1.9591	0	0.077895	0.052122	0.658351	0.210285	5.4	0	3.4	0.182361	0	0.897367	0	4.95608	0	0.166766	0.048241	0.318995	0.110651	15.2	0	11.4
44	0.094547	0	0.355756	0	1.31074	0	0.035817	0.041011	0.511877	0.294953	23.2	0	1	0.053264	0.3927	0.885004	0.097605	1.198	0.021616	0.04743	0.075037	1.1731	0.358083	0.8	0	0.6	0.193002	0	0.924378	0	5.40464	0	0.181049	0.059096	0.360583	0.104067	17.2	0	13.8
45	0.177147	0	0.881222	0	6.02758	0	0.159461	0.04184	0.280279	0.082168	28.8	0	20.8	0.129917	0.336464	0.919594	0.203486	3.04087	0.047836	0.120732	0.071661	0.489421	0.143141	6.2	0.2	4.8	0.18723	0	0.726675	0	4.1607	0	0.143393	0.060753	0.381931	0.127189	20.4	0	8.2
46	0.158547	0	0.588852	0	3.64301	0	0.099871	0.046123	0.343535	0.135502	38.2	0	7.6	0.004028	0	0.657987	0	0.067189	0	0.002654	-1	-1	-1	0	0	0	0.211202	0	0.873555	0	5.60302	0	0.189559	0.055279	0.310375	0.096358	21.4	0	15
47	0.106496	0	0.628603	0	2.59428	0	0.0697	0.036117	0.405657	0.170713	15.4	0	3.8	0.070831	0	1.00772	0	1.81297	0	0.071339	0.048104	0.782693	0.266195	3	0	2.8	0.19157	0	0.924861	0	5.36637	0	0.179763	0.054659	0.338664	0.104857	16.8	0	13.4
48	0.035883	0	0.234712	0	0.325096	0	0.00866	-1	-1	-1	4.2	0	0	0.086569	0	1.36679	0	2.97847	0	0.11468	0.041784	0.561958	0.299099	8.4	0	8.4	0.117316	0	0.383494	0	1.37793	0	0.048498	0.047842	0.505946	0.285534	17.4	0	0.8
49	0.06297	0	0.352984	0	0.862515	0	0.023172	0.038578	0.723137	0.425849	10.2	0	0.4	0.094147	0	1.19289	0	2.84073	0	0.110303	0.063193	0.769554	0.260195	7	0	7	0.141363	0	0.827612	0	3.54293	0	0.119916	0.044959	0.391288	0.146677	9.4	0	5.6
50	0.033768	0	1e-06	0	1e-06	0	0	0.020127	1.215	0.615987	5.8	0	0	0.05067	0	0.959127	0	1.2346	0	0.0487	0.04136	0.944268	0.366824	1.4	0	1.2	0.205616	0	0.670753	0	4.22583	0	0.147932	0.046008	0.273716	0.113431	28	0	8.4
51	0.122915	0	0.480748	0	2.30583	0	0.063119	0.043974	0.422117	0.20077	29.4	0	3	0.033398	0	1.10625	0	0.938262	0	0.036816	0.051696	1.77376	0.610907	0.6	0	0.6	0.122846	0	0.728661	0	2.71838	0	0.0926	0.045506	0.451251	0.18169	8.4	0	3.2
52	0.121533	0	0.51292	0	2.42985	0	0.066259	0.044796	0.434782	0.196073	26.6	0	3.2	0.000507	0	26.3454	0	0.337326	0	0.013179	-1	-1	-1	0.4	0	0.4	0.141854	0	0.752239	0	3.24404	0	0.110595	0.045996	0.392703	0.153874	10.8	0	4.6
53	0.104332	0	0.389849	0	1.58669	0	0.043439	0.042431	0.480368	0.261716	26.2	0	1.4	0.066333	0	1.41676	0	2.37146	0	0.09145	0.059662	1.02726	0.510262	5.4	0	5.4	0.182077	0	0.820769	0	4.53943	0	0.154485	0.047232	0.31506	0.114125	16.2	0	9.4
54	0.126332	0	0.853152	0	4.15613	0	0.109817	0.034391	0.329392	0.116175	14.4	0	9.4	0.076588	0	1.19215	0	2.31028	0	0.08998	0.04723	0.711074	0.288626	4.6	0	4.6	0.219291	0	0.728316	0	4.8769	0	0.169831	0.043676	0.250081	0.099794	28.2	0	11.2
55	0.082953	0	0.495332	0	1.5923	0	0.042885	0.033288	0.484071	0.248611	12.8	0	1.4	0.054492	0	1.51893	0	2.08688	0	0.080494	0.046396	0.979868	0.598723	4.4	0	4.4	0.134037	0	0.902857	0	3.65916	0	0.122612	0.048242	0.430779	0.150658	8	0	6
56	0.07794	0	0.518364	0	1.5656	0	0.041977	0.037713	0.571533	0.275018	10.6	0	1.4	0.074332	0	1.09213	0	2.06012	0	0.080628	0.063681	0.981822	0.281289	3.6	0	3.6	0.233883	0	0.887775	0	6.30394	0	0.213232	0.051015	0.262635	0.086223	26.2	0	19.2
57	0.120755	0	0.577622	0	2.71346	0	0.0735	0.040464	0.397146	0.169144	22.4	0	4	0.001024	0	15.9934	0	0.41349	0	0.016128	-1	-1	-1	0.8	0	0.8	0.190025	0	0.819637	0	4.73159	0	0.161279	0.045656	0.294765	0.1091	18	0	10.4
58	0.078731	0	0.493404	0	1.50442	0	0.04046	0.033541	0.511632	0.263418	11.6	0	1.2	0.062782	0	0.118222	0	0.191346	0	0.007857	0.05321	0.976142	0.753673	10.4	0	0	0.271904	0	1.04303	0	8.52168	0	0.280325	0.048439	0.217372	0.076905	36.8	0	35.6
59	0.066674	0	0.00354	0	0.0092	0	0.000253	0.031373	0.601479	0.485434	23.6	0	0	0.077531	0	0.98333	0	1.93688	0	0.076337	0.042789	0.63959	0.24083	3.6	0	3.2	0.154819	0	0.957594	0	4.47537	0	0.149234	0.047837	0.370349	0.130109	10.8	0	9.2
60	0.138737	0	0.581207	0	3.13815	0	0.085609	0.036158	0.31306	0.138462	29.6	0	5.4	0.093897	0	0.752293	0	1.80197	0	0.07232	0.04088	0.508208	0.212998	6.4	0	2.8	0.199711	0	0.965999	0	5.81886	0	0.19424	0.045568	0.280522	0.101069	18.2	0	15.8
61	0.063829	0	0.626727	0	1.54419	0	0.04098	0.033427	0.627329	0.279185	5.2	0	1.2	0.089717	0	0.749444	0	1.7173	0	0.068784	0.047071	0.606933	0.228726	5.8	0	2.4	0.157946	0	0.666834	0	3.21801	0	0.111174	0.048715	0.370056	0.151914	16.2	0	4.8
62	0.072048	0	0.467371	0	1.30491	0	0.035017	0.034589	0.57148	0.302111	10.2	0	1	0.052348	0	0.407112	0	0.54593	0	0.021994	0.045233	0.994294	0.579643	3.8	0	0.2	0.147232	0	0.845612	0	3.76891	0	0.127397	0.045686	0.375285	0.139689	10.2	0	6.4
63	0.135941	0	0.751353	0	3.95608	0	0.105713	0.041871	0.364799	0.120117	19.6	0	8.6	0.080509	0	0.635113	0	1.30946	0	0.05268	0.057122	0.814823	0.314809	5.8	0	1.4	0.192355	0	0.828175	0	4.83353	0	0.164749	0.044872	0.28857	0.107219	18	0	10.8
64	0.07277	0	0.772963	0	2.16891	0	0.057193	0.038234	0.620627	0.216749	5.2	0	2.4	0.082631	0.415153	0.604959	0.159592	1.27962	0.036047	0.051675	0.07393	0.737347	0.374847	4.4	0.2	0.4	0.196956	0	1.0737	0	6.35639	0	0.208446	0.052208	0.315919	0.108588	19.2	0	18.8
65	0.102814	0	0.759497	0	3.01715	0	0.080067	0.039715	0.456735	0.156229	10.8	0	5	0.07355	0.260981	0.612978	0.08981	1.1533	0.020298	0.046405	0.074339	0.941555	0.416166	3.8	0	0.4	0.201078	0	0.796311	0	4.87147	0	0.166959	0.046614	0.282269	0.104648	21	0	11.2
66	0.116426	0	0.558704	0	2.52938	0	0.068571	0.039599	0.403266	0.178276	21.8	0	3.4	0.140352	0.59547	1.01247	0.390805	3.60165	0.088606	0.141855	0.071151	0.369764	0.137748	5	1	4.8	0.169808	0	0.854767	0	4.4071	0	0.148816	0.053606	0.374053	0.121072	13.6	0	9
67	0.119516	0	0.595178	0	2.76268	0	0.07475	0.037449	0.374411	0.160753	21	0	4	0.090393	0	1.00738	0	2.31342	0	0.091	0.056286	0.714796	0.209641	5	0	4.6	0.117025	0	0.936086	0	3.30199	0	0.110371	0.046077	0.483541	0.172284	5.8	0	4.8
68	0.124738	0	0.684339	0	3.31012	0	0.088862	0.040008	0.380864	0.140847	18.6	0	6	0.054999	0	0.941819	0	1.31602	0	0.051966	0.040984	0.86198	0.337748	1.8	0	1.4	0.139456	0	0.92596	0	3.89843	0	0.130478	0.045588	0.396891	0.144484	8.6	0	6.8
69	0.11065	0	0.428667	0	1.84868	0	0.050633	0.035369	0.3832	0.20774	26.8	0	1.8	0.070768	0.381843	1.32748	0.125539	2.36933	0.028258	0.091815	0.074108	0.888498	0.481699	3.6	0	3.6	0.158727	0	1.09998	0	5.23306	0	0.171869	0.045397	0.350056	0.135542	12.4	0	12.4
70	0.086467	0	0.783621	0	2.61227	0	0.069049	0.034437	0.476445	0.177691	7.2	0	3.6	0.050389	0.569084	2e-06	0.13344	3e-06	0.029312	0	0.035118	0.945541	0.681151	7.2	0.4	0	0.112295	0	0.72385	0	2.46996	0	0.083886	0.046587	0.4976	0.200228	7.2	0	2.6
71	0.130732	0.297597	0.520385	0.216774	2.64933	0.042839	0.072582	0.056382	0.410318	0.211644	24.8	0.4	1.8	0.096914	0.361843	0.908304	0.162541	2.23981	0.037379	0.088816	0.073045	0.65099	0.192944	3	0	2.2	0.197543	0	0.895058	0	5.35429	0	0.180555	0.047154	0.290658	0.10216	17.8	0	13.2
72	0.140486	0	0.843131	0	4.57236	0	0.121117	0.038505	0.326901	0.105512	18.4	0	11.6	0.05376	0	0.95529	0	1.304	0	0.05148	0.039449	0.856976	0.345905	1.8	0	1.4	0.191868	0	0.864715	0	5.04134	0	0.170332	0.060364	0.368962	0.107057	17.8	0	12.2
73	0.068309	0	0.081295	0	0.21628	0	0.005925	0.033211	0.589943	0.467579	21.4	0	0.2	0.091358	0	1.11289	0	2.57355	0	0.100633	0.043863	0.558413	0.220464	5.8	0	5.8	0.174937	0	1.07005	0	5.62625	0	0.184926	0.048553	0.333231	0.121049	15	0	14.6
74	0.088334	0	0.635585	0	2.1719	0	0.058011	0.036139	0.486943	0.204759	10.2	0	2.4	0.035198	0	2.08953	0	1.84606	0	0.070832	0.057275	1.90784	1.94443	5.2	0	5.2	0.21763	0	0.804251	0	5.33948	0	0.182817	0.056722	0.308919	0.098152	24.4	0	13.6
75	0.0784	0	0.746501	0	2.25965	0	0.059712	0.041654	0.626574	0.210424	6.4	0	2.8	0.20354	0.210664	1.02034	0.200537	5.27013	0.051086	0.206824	0.067807	0.328067	0.095605	20.4	0.2	19.2	0.151547	0	0.877252	0	4.02109	0	0.135465	0.04475	0.36256	0.133933	10.4	0	7.2
76	0.124276	0	0.615216	0	2.966	0	0.080297	0.034009	0.331079	0.144978	21.6	0	4.8	0.116442	0.392388	0.95568	0.212754	2.82926	0.049169	0.111859	0.071794	0.521417	0.159677	4.4	0.2	3.8	0.182343	0	0.797479	0	4.4114	0	0.15099	0.043909	0.305865	0.115066	17	0	9
77	0.137497	5e-06	0.628448	4e-06	3.36302	1e-06	0.091062	0.051973	0.442876	0.15695	26	0	6.2	0.067928	0	0.50886	0	0.882813	0	0.035759	0.04103	0.716343	0.377734	5.4	0	0.6	0.158439	0	0.96681	0	4.61834	0	0.15399	0.045516	0.350378	0.12747	11	0	9.6
78	0.087715	0	0.230145	0	0.787972	0	0.021649	0.037723	0.510241	0.345557	26.2	0	0.4	0.20991	0.365464	0.910085	0.359256	4.87455	0.088503	0.194711	0.067457	0.282711	0.088469	16.2	0.8	12.2	0.226131	0	0.877657	0	6.02089	0	0.204112	0.047309	0.25454	0.089505	24.2	0	17.2
79	0.115183	0	0.530595	0	2.37908	0	0.064609	0.044604	0.456024	0.201051	22.8	0	3	0.059965	0	0.821764	0	1.25281	0	0.049809	0.039372	0.770352	0.319328	2.2	0	1.4	0.170056	0	0.906231	0	4.66149	0	0.156607	0.046416	0.331459	0.118532	13.2	0	10
80	0.14709	0	0.621659	0	3.55899	0	0.096828	0.041434	0.33423	0.131749	30.2	0	7	0.088146	0	0.915467	0	2.05065	0	0.081301	0.040237	0.533438	0.21099	4.8	0	3.6	0.175762	0	0.960668	0	5.10208	0	0.170024	0.052626	0.356839	0.11454	14	0	12.2
81	0.156483	0.000291	0.797822	0.000255	4.83608	5.4e-05	0.128924	0.053596	0.40094	0.103726	24.4	0	13.4	0.141611	0.439118	0.893947	0.291924	3.22599	0.067549	0.128523	0.070947	0.409631	0.132731	6.4	0.6	4.4	0.165157	0	0.977291	0	4.86709	0	0.162015	0.046651	0.342074	0.12249	12.2	0	10.8
82	0.089436	0	0.504278	0	1.74862	0	0.047193	0.033068	0.44807	0.227426	14.4	0	1.6	0.071214	0	0.738706	0	1.34311	0	0.053604	0.05206	0.838505	0.298677	3.6	0	1.4	0.136371	0	0.873558	0	3.60171	0	0.121218	0.045615	0.407825	0.149127	8.4	0	5.8
83	0.148867	0	0.753726	0	4.34264	0	0.116475	0.036257	0.293421	0.106014	23.4	0	10.6	0.0554	0	0.000536	0	0.000765	0	3.1e-05	0.035471	0.873803	0.661664	10	0	0	0.193783	0	0.874724	0	5.14078	0	0.173724	0.050767	0.313899	0.104793	17.6	0	12.4
84	0.144879	0	0.811672	0	4.54524	0	0.120893	0.038031	0.313943	0.104458	20.2	0	11.4	0.066002	0	0.52622	0	0.887658	0	0.035853	0.039182	0.69851	0.372761	4.8	0	0.6	0.187653	0	0.947782	0	5.36322	0	0.179615	0.044113	0.292674	0.107384	16	0	13.4
85	0.083114	0	0.484333	0	1.5604	0	0.042057	0.033096	0.47967	0.250552	13	0	1.2	0.107753	0	1.08276	0	2.95816	0	0.115639	0.054343	0.580993	0.187273	7.8	0	7.6	0.104432	0	0.987003	0	3.1052	0	0.103215	0.046312	0.54106	0.194021	4.6	0	4.2
86	0.209194	0.201398	0.720242	0.235118	5.86791	0.050581	0.160036	0.053608	0.262537	0.088125	40.4	0.4	13.6	0.048338	0.808521	1.07024	0.182272	1.31011	0.039447	0.051558	0.075573	0.973309	0.433595	0.4	0.2	0.4	0.183018	0	0.813398	0	4.52848	0	0.154131	0.051013	0.333004	0.114692	16.8	0	9.6
87	0.064755	0	0.255671	0	0.643085	0	0.017394	0.033699	0.622238	0.419774	13.4	0	0.2	0.072744	0	0.520069	0	0.969084	0	0.0392	0.041725	0.665019	0.349424	6	0	0.8	0.173535	0	0.928611	0	4.87241	0	0.163168	0.048346	0.335004	0.115884	13.6	0	11
88	0.061015	0	0.139469	0	0.330627	0	0.008981	0.03336	0.657965	0.497418	15	0	0	0.02786	0	0.358304	0	0.254396	0	0.010164	-1	-1	-1	1.2	0	0	0.216017	0	0.812292	0	5.34407	0	0.182884	0.04841	0.272487	0.09648	23.6	0	13.4
89	0.157781	0	0.685032	0	4.20376	0	0.113738	0.049201	0.365998	0.12029	30.4	0	10	0.068628	0	0.979901	0	1.70782	0	0.067342	0.042178	0.712346	0.271839	2.8	0	2.4	0.28025	0	0.854053	0	7.28765	0	0.249555	0.048278	0.211161	0.072409	39.4	0	26.4
90	0.107039	0	0.832132	0	3.43392	0	0.0907	0.035529	0.397994	0.138981	10.4	0	6.4	0.022268	0	0.082668	0	0.046985	0	0.001879	0.049161	2.63541	2.068	1.4	0	0	0.188286	0	0.76417	0	4.3839	0	0.150568	0.04671	0.302296	0.114487	19	0	8.8
91	0.121749	0	0.736049	0	3.47018	0	0.092588	0.045349	0.438779	0.140008	16	0	6.6	0.105776	0	1.44362	0	3.82101	0	0.145855	0.038768	0.43449	0.257419	14.8	0	14.8	0.098031	0	0.638446	0	1.89951	0	0.064887	0.051308	0.644881	0.261234	6.4	0	1.4
92	0.115258	0	0.622477	0	2.781	0	0.075009	0.033299	0.350284	0.154209	18.4	0	4.2	0.029011	0	0.002786	0	0.002068	0	8.3e-05	0.033571	1.58374	1.21444	2.6	0	0	0.166049	0	1.14652	0	5.69955	0	0.185856	0.046289	0.339726	0.135056	14.8	0	14.8
93	0.156487	0	0.769806	0	4.66998	0	0.124966	0.043691	0.330128	0.102846	25.4	0	12.2	0.077747	0	1.46139	0	2.86173	0	0.109685	0.052957	0.782323	0.427993	8.2	0	8.2	0.162907	0	0.951694	0	4.67553	0	0.156267	0.045047	0.34127	0.123703	11.8	0	10
94	0.100059	0	0.732621	0	2.83362	0	0.075321	0.03535	0.422587	0.161055	10.8	0	4.4	0.110851	0	0.90245	0	2.54944	0	0.101131	0.05532	0.573637	0.168073	7.8	0	5.8	0.191973	0	0.933753	0	5.41574	0	0.181565	0.046638	0.29615	0.104805	16.6	0	13.6
95	0.120624	0	0.559977	0	2.62497	0	0.071333	0.035269	0.351444	0.161917	23.2	0	3.6	0.096931	0	0.984309	0	2.42369	0	0.095556	0.047197	0.563764	0.192915	5.8	0	5	0.138705	0	0.938578	0	3.93056	0	0.131304	0.046302	0.403084	0.145093	8.4	0	7
96	0.049541	0	0.658668	0	1.25558	0	0.033192	-1	-1	-1	3	0	0.8	0.065501	0	0.836228	0	1.39166	0	0.055368	0.039689	0.715118	0.290485	2.6	0	1.6	0.204601	0	0.866894	0	5.38912	0	0.182333	0.055723	0.323385	0.099761	20	0	13.8
97	0.165658	0	0.611043	0	3.94799	0	0.108196	0.037531	0.272471	0.113102	39.6	0	8.8	0.017487	0	0.221596	0	0.098721	0	0.003929	0.056212	3.76279	2.5527	0.6	0	0	0.162987	0	1.20118	0	5.84742	0	0.189561	0.045839	0.343243	0.144735	15.8	0	15.8
98	0.147827	0	0.704165	0	4.04128	0	0.108855	0.042039	0.337339	0.117358	25.6	0	9.2	0.08666	0	0.994792	0	2.18827	0	0.086247	0.041545	0.559015	0.216183	4.6	0	4.2	0.227823	0	0.95109	0	6.54506	0	0.219122	0.048773	0.260165	0.088307	24	0	20.4
99	0.125271	0	0.484129	0	2.36399	0	0.064837	0.038998	0.370723	0.181371	30.4	0	3.2	0.06456	0	0.587358	0	0.968825	0	0.038957	0.039574	0.713441	0.358628	4	0	0.6	0.19995	0	0.747647	0	4.56482	0	0.157436	0.048607	0.293795	0.109745	22.6	0	10
100	0.15484	0	0.673861	0	4.05418	0	0.10989	0.038506	0.29734	0.113085	30	0	9.4	0.108973	0	0.591576	0	1.65715	0	0.067469	0.055253	0.583164	0.24359	11.8	0	2.4	0.282199	0	1.00003	0	8.50386	0	0.282205	0.047946	0.208425	0.072377	38.4	0	35.4

## Sheet: 5
Full INSIGHT results (INT3).
no CpG filtering
	rho	eta	gamma	Dp	Pw	alpha	tau
Estimates:	0.343889	0	0.120811	0	1.71577	0	0.05955
StndrdErr:	0.042442	0.146064	0.106745	0.29742	1.71694	0.076557	0.059564
Posterior:	0.343889	--------	--------	0	1.71503	0	0.059349
----------------------------------------------------------------------------------------------
	iter	lnLd	diff	status
EM status:	3655	-23847.4	9.97843e-07	converged
human CpG filtering
rho	eta	gamma	Dp	Pw	alpha	tau
Estimates:	0.251245	0	0.397281	0	2.63864	0	0.117627
StndrdErr:	0.049568	0.229014	0.126646	0.283107	1.31002	0.076846	0.058119
Posterior:	0.251244	--------	--------	0	2.63872	0	0.116844
----------------------------------------------------------------------------------------------
	iter	lnLd	diff	status
EM status:	4346	-18332.4	9.9996e-07	converged
ancestral CpG filtering
rho	eta	gamma	Dp	Pw	alpha	tau
Estimates:	0.516017	0	0.494034	0	8.24567	0	0.345007
StndrdErr:	0.049594	0.114724	0.054421	0.286309	1.61003	0.122317	0.066465
Posterior:	0.516016	--------	--------	0	8.24576	0	0.343109
----------------------------------------------------------------------------------------------
	iter	lnLd	diff	status
EM status:	1671	-12932.5	9.98982e-07	converged

## Sheet: 6
The effect of varying the threshold between high and low frequency minor alleles on the INSIGHT analysis (human filtering; INT3).
threshold	rho	eta	gamma	alpha	tau
0.05	0.255154	0	0.409155	0	0.12293
0.1	0.248807	0	0.389687	0	0.114316
0.2	0.246013	0	0.380799	0	0.110517

## Sheet: 7
multiDFE negative control (INT3).
	no CpG filtering		human CpG filtering		ancestral CpG filtering
simulation	Proportion Nes between 0 and 0.1	Proportion Nes between 0.1 and 1	Proportion Nes between 0 and 0.1	Proportion Nes between 0.1 and 1	Proportion Nes between 0 and 0.1	Proportion Nes between 0.1 and 1
1	4.41407e-223	1	0	1	1	3.76821e-12
2	1	2.50478e-10	1.54669e-201	1	0	1.08958e-18
3	3.3177e-320	1	6.62265e-81	1	0.855204	0.0378608
4	1.86401e-07	1	1	7.95541e-12	0.645575	0.106806
5	0.965374	2.30996e-10	1.45626e-226	1	0.860323	0.0364625
6	0	1	1.08009e-86	1	0	1
7	0.934381	2.07663e-10	0	1	0.971209	6.92625e-11
8	0.890449	3.98697e-11	6.01177e-126	1	1	1.06165e-11
9	0	1	1.09336e-176	1	0.9152	6.90089e-10
10	7.29907e-233	1	6.90037e-54	1	0.80282	0.0639231
11	0	1	9.69871e-243	1	0	1
12	0.869035	0.0166008	1.2662e-80	1	0.946594	0.0115763
13	0.846603	0.0322964	8.82549e-297	1	1	7.60736e-12
14	0	1	1.89583e-170	1	0.766527	0.0632435
15	2.4586e-227	1	0	1	1	3.92797e-13
16	1	4.13314e-12	8.18091e-78	1	0.919043	0.00658953
17	0.840545	0.0250713	0	1	0.853162	0.0365976
18	1.21788e-197	1	0	1	0.859412	0.0298225
19	0.954569	8.62134e-10	0	1	1	3.43547e-12
20	2.27109e-221	1	3.35247e-43	1	0.826948	0.0530189
21	1	1.16708e-10	4.78183e-210	1	0.805737	0.0541399
22	0.906668	5.1302e-09	1.52978e-38	1	1	6.20726e-12
23	0	1	0	1	0.907998	6.0455e-11
24	3.12997e-192	1	0.164374	0.656113	1	3.0369e-12
25	0	1	1.325e-22	1	0.804122	0.0509818
26	0.921183	2.16854e-11	8.59064e-123	1	0	1
27	0	1	8.24553e-58	1	0	0.038114
28	4.7583e-248	1	1.51421e-180	1	1.28308e-89	1
29	1.39787e-122	1	1	9.83503e-11	0.914908	3.30118e-10
30	0.915539	3.08708e-09	1	1.48115e-12	1	3.8558e-13
31	1.28369e-201	1	1.83702e-138	1	0.615089	0.0853112
32	1	1.31916e-09	0	1	0.815553	0.0499257
33	3.71597e-266	1	2.33464e-117	1	0	1
34	4.80075e-08	1	0	1	0.783729	0.0540394
35	8.43987e-86	1	1.29878e-237	1	0.576251	0.162505
36	0.857351	0.0213233	7.21844e-96	1	1	2.64826e-10
37	1	5.23429e-10	9.03523e-82	1	0.811929	0.0451407
38	0	1	1	3.3144e-10	1.03173	3.62872e-09
39	0.808685	0.0386739	7.21668e-80	1	0.991982	0.00278637
40	0	1	1	2.07207e-11	0.839259	0.0238595
41	1	6.07469e-10	6.27007e-302	1	1	5.36349e-12
42	0	1	7.95521e-178	1	1	8.46545e-13
43	0	1	1.85613e-193	1	1	1.45795e-12
44	1.10267e-261	1	0	1	0.951069	1.01752e-11
45	1.06917	8.18952e-09	0	1	0.890488	0.0273339
46	2.8913e-281	1	0	1	0.905893	0.0182846
47	1.02158	3.32631e-08	7.17322e-81	1	0.826403	0.0695279
48	0	1	1	1.46079e-10	1	2.72493e-12
49	2.10509e-36	1	0	1	0	0.999999
50	0.883115	0.00445157	6.97763e-25	1	0.862938	0.0195921
51	0.927543	1.35882e-08	1.83269e-175	1	1	1.63565e-11
52	0.908248	4.64817e-10	0	1	0	1
53	0.914736	2.42713e-09	7.23608e-173	1	0.813323	0.0636641
54	0	1	1.32801e-165	1	1	2.77134e-12
55	5.99743e-43	1	7.55622e-169	1	0.957619	0.00373914
56	2.4569e-219	1	5.67275e-248	1	1	5.75658e-11
57	1	4.9486e-12	0	1	0	0.974524
58	6.27175e-88	1	9.08902e-43	1	0.885693	5.52628e-09
59	6.10634e-277	1	1	8.949e-11	0.910619	5.92951e-10
60	3.34328e-112	1	0	1	0.864807	0.0452346
61	1.05098	1.47173e-10	1	3.58979e-12	0	1
62	0.892049	0.0136964	0	1	0.724532	0.123625
63	0	1	2.1899e-06	0.999998	0.905263	0.0120396
64	0.970475	1.70417e-09	1.78285e-300	1	1	1.01252e-13
65	0	1	0.107615	0.619148	0.962322	1.19183e-08
66	0.850448	0.0214781	1.766869e-313	1	1	2.90156e-11
67	0.934911	4.81598e-10	1	3.90033e-12	0.832969	0.052575
68	0	1	1.54088e-238	1	0.933882	0.0164517
69	0.961553	1.43754e-10	1.9901e-57	1	1	1.60506e-09
70	8.23003e-79	1	0	1	1	7.70656e-10
71	1.04863e-84	1	1.1585e-14	1	0.730598	0.0748737
72	1	6.66578e-13	1	2.26374e-12	1	2.01128e-12
73	2.27648e-200	1	1	4.42067e-11	0	0.987517
74	0	1	3.04157e-220	1	0.92679	0.0259268
75	1.09485e-201	1	0	1	0	1
76	0.896977	5.63814e-09	2.09867e-84	1	0	1
77	3.33908e-07	1	1.69557e-38	1	0.645103	0.108325
78	6.96025e-209	1	1.41758e-118	1	1	4.47164e-12
79	1.10754	6.06527e-10	0	1	0.657649	0.104928
80	0	1	5.75971e-16	1	0.978113	0.00722052
81	0.980739	1.12858e-10	9.32316e-138	1	0.904499	8.6322e-08
82	0.938821	1.17146e-08	1.72333e-219	1	0	1
83	0	1	6.00173e-58	1	0.915294	2.42161e-08
84	0	1	8.44285e-226	1	0.876566	0.0138351
85	0	1	3.19081e-199	1	1	1.22776e-10
86	3.95659e-195	1	1	5.28444e-12	0.753951	0.0726034
87	6.69184e-200	1	0	1	1.02402	3.39459e-09
88	0	1	6.78257e-234	1	0	0.999978
89	1.38368e-39	1	6.73832e-257	1	0.965018	0.0078902
90	0	1	1.9242e-127	1	0	1
91	1.11594e-129	1	0	1	1	2.67453e-13
92	0	1	1	2.16921e-11	0.960574	0.0170662
93	0.915566	7.32678e-09	0	1	1	7.58761e-11
94	2.89877e-11	1	1	1.5756e-11	0	1
95	0.966579	1.76672e-10	9.02303e-144	1	1	6.03906e-12
96	3.07982e-267	1	6.97932e-190	1	0.945967	0.0167119
97	0.844675	0.0273451	6.48746e-120	1	0.835997	0.0318428
98	0.940319	8.16659e-11	2.82015e-205	1	0.919458	0.0250373
99	2.94549e-94	1	0	1	1	8.19358e-11
100	0.964968	8.3592e-12	1	4.3331e-10	0	1

## Sheet: 8
Full multiDFE results (INT3).
no CpG filtering								human CpG filtering								ancestral CpG filtering
model	pop_change	AIC	Nes_0.0_0.1	Nes_0.1_1.0	Nes_1.0_10.0	Nes_10.0_100.0	raw	model	pop_change	AIC	Nes_0.0_0.1	Nes_0.1_1.0	Nes_1.0_10.0	Nes_10.0_100.0	raw	model	pop_change	AIC	Nes_0.0_0.1	Nes_0.1_1.0	Nes_1.0_10.0	Nes_10.0_100.0	raw
lognormal	FALSE	118188	0.0648987	0.26507	0.407285	0.219095	{'nspikes': 0.0, 'mean': -0.2418633, 'Nes_0.0_0.1': 0.06489873, 'acc': 0.0, 'ranrep': 1.0, 'Nes_1.0_10.0': 0.4072849, 'selmode': 4.0, 'Nes_10.0_100.0': 0.2190953, 'L': -59091.90964667727, 'logmean': -3.66263, 'model': 'lognormal', 'seed': 0.0, 'fix_prob': 0.255401, 'meanH': -0.003340018, 'mean2': -2.137457, 'AIC': 118187.81929335454, 'Nes_0.1_1.0': 0.2650698, 'logsigma': 2.142137, 'f0': 0.990645}	lognormal	FALSE	65778.4	0.0990167	0.342674	0.398151	0.14375	{'mean': -0.1015818, 'L': -32887.204433508094, 'seed': 0.0, 'Nes_0.0_0.1': 0.09901674, 'logsigma': 2.018944, 'model': 'lognormal', 'fix_prob': 0.343551, 'nspikes': 0.0, 'meanH': -0.002282803, 'acc': 0.0, 'logmean': -4.309021, 'mean2': -0.405392, 'selmode': 4.0, 'f0': 0.993977, 'AIC': 65778.40886701619, 'Nes_1.0_10.0': 0.3981507, 'Nes_10.0_100.0': 0.1437496, 'Nes_0.1_1.0': 0.3426736, 'ranrep': 1.0}	lognormal	FALSE	30177.7	0.0242208	0.258569	0.512333	0.191777	{'AIC': 30177.740162760812, 'f0': 0.993591, 'meanH': -0.006632693, 'logsigma': 1.645998, 'Nes_0.0_0.1': 0.02422082, 'selmode': 4.0, 'fix_prob': 0.211106, 'logmean': -3.659422, 'model': 'lognormal', 'Nes_0.1_1.0': 0.2585687, 'ranrep': 1.0, 'Nes_10.0_100.0': 0.1917772, 'nspikes': 0.0, 'mean': -0.09900369, 'mean2': -0.1425176, 'seed': 0.0, 'acc': 0.0, 'L': -15086.870081380406, 'Nes_1.0_10.0': 0.5123…
gamma	FALSE	118181	0.174659	0.176564	0.32604	0.307556	{'nspikes': 0.0, 'mean': -0.1303349, 'Nes_0.0_0.1': 0.1746586, 'acc': 0.0, 'ranrep': 1.0, 'Nes_1.0_10.0': 0.3260401, 'selmode': 2.0, 'Nes_10.0_100.0': 0.3075557, 'L': -59088.607543396916, 'AIC': 118181.21508679383, 'model': 'gamma', 'seed': 0.0, 'beta': 0.305504, 'fix_prob': 0.302075, 'meanH': -0.001779176, 'mean2': -0.07198703, 'Nes_0.1_1.0': 0.1765638, 'f0': 0.990627, 'E(s)': -0.13178}	gamma	FALSE	65775.9	0.244666	0.208872	0.337454	0.206868	{'L': -32885.96847467648, 'model': 'gamma', 'seed': 0.0, 'Nes_0.0_0.1': 0.2446664, 'E(s)': -0.070982, 'fix_prob': 0.394749, 'nspikes': 0.0, 'meanH': -0.001362547, 'acc': 0.0, 'beta': 0.271203, 'Nes_1.0_10.0': 0.3374545, 'mean2': -0.02315205, 'selmode': 2.0, 'f0': 0.993963, 'AIC': 65775.93694935297, 'mean': -0.07072307, 'Nes_10.0_100.0': 0.206868, 'Nes_0.1_1.0': 0.2088725, 'ranrep': 1.0}	gamma	FALSE	30176.7	0.113471	0.195983	0.434777	0.255098	{'AIC': 30176.690455152453, 'f0': 0.993579, 'Nes_10.0_100.0': 0.2550984, 'Nes_0.0_0.1': 0.1134705, 'selmode': 2.0, 'fix_prob': 0.256253, 'mean': -0.0793114, 'model': 'gamma', 'Nes_0.1_1.0': 0.1959825, 'ranrep': 1.0, 'meanH': -0.002277239, 'nspikes': 0.0, 'E(s)': -0.079404, 'beta': 0.442331, 'mean2': -0.0203936, 'seed': 0.0, 'acc': 0.0, 'L': -15086.345227576227, 'Nes_1.0_10.0': 0.4347774}
beta	FALSE	118180	0.194379	0.165156	0.295735	0.344731	{'nspikes': 0.0, 'mean': -0.1264587, 'Nes_0.0_0.1': 0.1943786, 'acc': 0.0, 'ranrep': 1.0, 'Nes_1.0_10.0': 0.2957345, 'selmode': 3.0, 'Nes_10.0_100.0': 0.3447308, 'L': -59087.924525448165, 'AIC': 118179.84905089633, 'model': 'beta', 'seed': 0.0, 'beta': 1.849235, 'fix_prob': 0.313322, 'meanH': -0.001722223, 'mean2': -0.05143338, 'beta_scaler': 1.873487, 'Nes_0.1_1.0': 0.1651561, 'alpha': 0.2677944…	beta	FALSE	65775.6	0.260137	0.197867	0.319755	0.222241	{'mean2': -0.0192531, 'L': -32885.8038118593, 'seed': 0.0, 'Nes_0.0_0.1': 0.2601369, 'beta_scaler': 1.946818, 'model': 'beta', 'fix_prob': 0.402206, 'nspikes': 0.0, 'meanH': -0.001352717, 'acc': 0.0, 'beta': 3.286684, 'Nes_1.0_10.0': 0.3197553, 'alpha': 0.247437, 'selmode': 3.0, 'f0': 0.99396, 'AIC': 65775.6076237186, 'mean': -0.0699952, 'Nes_10.0_100.0': 0.2222413, 'Nes_0.1_1.0': 0.1978665, 'ran…	beta	FALSE	30176.6	0.123549	0.190579	0.418104	0.267768	{'AIC': 30176.564440800867, 'f0': 0.993577, 'Nes_10.0_100.0': 0.2677677, 'Nes_0.0_0.1': 0.1235492, 'selmode': 3.0, 'fix_prob': 0.262206, 'alpha': 0.4095951, 'model': 'beta', 'beta_scaler': 3.325403, 'Nes_0.1_1.0': 0.1905788, 'ranrep': 1.0, 'meanH': -0.002164344, 'nspikes': 0.0, 'mean': -0.07827063, 'beta': 4.822444, 'mean2': -0.01769924, 'seed': 0.0, 'acc': 0.0, 'L': -15086.282220400433, 'Nes_1.0…
spikes_2	FALSE	118177	0	0.449482	0	0.550518	{'nspikes': 2.0, 'p1': 0.4494824, 'mean': -0.09173437, 'Nes_0.0_0.1': 0.0, 'acc': 0.0, 'ranrep': 10.0, 'Nes_1.0_10.0': 0.0, 'selmode': 0.0, 'Nes_10.0_100.0': 0.5505176, 'L': -59085.58099996828, 'AIC': 118177.16199993656, 'p2': 0.5505176, 'seed': 0.0, 's2': -0.1653827, 'model': 'spikes_2', 'fix_prob': 0.357342, 'meanH': -0.004384471, 'mean2': -0.01498964, 'Nes_0.1_1.0': 0.4494824, 's1': -0.0022296…	spikes_2	FALSE	65775.3	0.50017	0	0	0.49983	{'p1': 0.5001698, 'fix_prob': 0.50017, 'L': -32884.62794919414, 'seed': 0.0, 'Nes_0.0_0.1': 0.5001698, 's2': -0.1052567, 'mean': -0.05248217, 'model': 'spikes_2', 's1': -2.471841e-11, 'nspikes': 2.0, 'meanH': -0.2100713, 'acc': 0.0, 'Nes_0.1_1.0': 0.0, 'mean2': -0.005510628, 'selmode': 0.0, 'f0': 0.993956, 'AIC': 65775.25589838828, 'Nes_1.0_10.0': 0.0, 'Nes_10.0_100.0': 0.4998302, 'p2': 0.4998302…	spikes_2	FALSE	30177.9	0	0.465958	0	0.534042	{'AIC': 30177.936310186, 'f0': 0.993574, 'Nes_10.0_100.0': 0.5340418, 's1': -0.005186528, 'selmode': 0.0, 'fix_prob': 0.266236, 's2': -0.116, 'model': 'spikes_2', 'p2': 0.5340418, 'Nes_0.1_1.0': 0.4659582, 'ranrep': 10.0, 'meanH': -0.01022542, 'nspikes': 2.0, 'mean': -0.06427864, 'Nes_0.0_0.1': 0.0, 'p1': 0.4659582, 'mean2': -0.007197715, 'seed': 0.0, 'acc': 0.0, 'L': -15085.968155093, 'Nes_1.0_1…
steps_2	FALSE	118178	0.366308	0.0181631	0.181632	0.433898	{'nspikes': 2.0, 'p1': 0.364327, 'mean': -0.1000992, 'Nes_0.0_0.1': 0.3663077, 'acc': 0.0, 'ranrep': 10.0, 'Nes_1.0_10.0': 0.1816315, 'selmode': 1.0, 'Nes_10.0_100.0': 0.4338976, 'L': -59086.00368158821, 'AIC': 118178.00736317642, 'p2': 0.635673, 'seed': 0.0, 's2': -0.315, 'model': 'steps_2', 'fix_prob': 0.380965, 'meanH': -0.05689613, 'mean2': -0.02101417, 'Nes_0.1_1.0': 0.01816315, 's1': -1.852…	steps_2	FALSE	65775.8	0.450103	0.0237599	0.237599	0.288538	{'p1': 0.4474658, 'fix_prob': 0.469277, 'L': -32884.91845384305, 'seed': 0.0, 'Nes_0.0_0.1': 0.4501035, 's2': -0.209295, 'mean': -0.0578209, 'model': 'steps_2', 's1': -8.591639e-07, 'nspikes': 2.0, 'meanH': -0.04563755, 'acc': 0.0, 'Nes_0.1_1.0': 0.0237599, 'mean2': -0.008068094, 'selmode': 1.0, 'f0': 0.993956, 'AIC': 65775.8369076861, 'Nes_1.0_10.0': 0.237599, 'Nes_10.0_100.0': 0.2885376, 'p2': …	steps_2	FALSE	30178	0.301432	0.0336457	0.336457	0.328465	{'AIC': 30178.01860240215, 'f0': 0.993575, 'Nes_10.0_100.0': 0.3284652, 's1': -4.703326e-05, 'selmode': 1.0, 'fix_prob': 0.328583, 's2': -0.1878623, 'model': 'steps_2', 'p2': 0.7021302, 'Nes_0.1_1.0': 0.03364568, 'ranrep': 10.0, 'meanH': -0.03265345, 'nspikes': 2.0, 'mean': -0.06596838, 'Nes_0.0_0.1': 0.3014323, 'p1': 0.2978698, 'mean2': -0.008262088, 'seed': 0.0, 'acc': 0.0, 'L': -15086.00930120…
spikes_3	FALSE	118181	0	0.449483	0	0.550517	{'p1': 0.4342446, 'mean': -0.09174957, 'ranrep': 10.0, 'AIC': 118181.16199993642, 'f0': 0.990614, 'p2': 0.01523797, 'seed': 0.0, 'model': 'spikes_3', 'fix_prob': 0.357341, 'mean2': -0.01498971, 'Nes_0.1_1.0': 0.4494826, 's1': -0.002204574, 'nspikes': 3.0, 'Nes_0.0_0.1': 0.0, 'acc': 0.0, 's3': -0.1653827, 'Nes_1.0_10.0': 0.0, 'selmode': 0.0, 'Nes_10.0_100.0': 0.5505174, 'L': -59085.58099996821, 's…	spikes_3	FALSE	65779.3	0.500169	0	9.96939e-11	0.499831	{'L': -32884.62794919316, 'seed': 0.0, 'Nes_0.0_0.1': 0.5001692, 'nspikes': 3.0, 'fix_prob': 0.500169, 's2': -0.02453784, 's3': -0.1052565, 'meanH': -0.2100711, 'AIC': 65779.25589838631, 'Nes_10.0_100.0': 0.4998308, 'p2': 9.969393e-11, 'ranrep': 10.0, 'p3': 0.4998308, 'p1': 0.5001692, 'f0': 0.993956, 'model': 'spikes_3', 's1': -8.020802e-13, 'acc': 0.0, 'Nes_1.0_10.0': 9.969393e-11, 'mean2': -0.0…	spikes_3	FALSE	30181.9	0	0.465958	0	0.534041	{'AIC': 30181.936310185793, 'fix_prob': 0.266235, 'selmode': 0.0, 'model': 'spikes_3', 'p3': 0.5340415, 'f0': 0.993574, 'meanH': -0.01027513, 'Nes_0.1_1.0': 0.4659585, 'Nes_0.0_0.1': 0.0, 'mean2': -0.007197868, 'L': -15085.968155092896, 'ranrep': 10.0, 'Nes_10.0_100.0': 0.5340415, 's1': -0.005170465, 'Nes_1.0_10.0': 0.0, 's2': -0.005698714, 'p2': 0.01419467, 'nspikes': 3.0, 'mean': -0.0642928, 's…
steps_3	FALSE	118181	0.0997176	0.349602	2.03843e-13	0.550681	{'p1': 0.4493193, 'mean': -0.09201983, 'ranrep': 10.0, 'AIC': 118181.16249976034, 'f0': 0.990614, 'p2': 3.631226e-13, 'seed': 0.0, 'model': 'steps_3', 'fix_prob': 0.359562, 'mean2': -0.01504737, 'Nes_0.1_1.0': 0.3496017, 's1': -0.004505917, 'nspikes': 3.0, 'Nes_0.0_0.1': 0.09971761, 'acc': 0.0, 's3': -0.165768, 'Nes_1.0_10.0': 2.038433e-13, 'selmode': 1.0, 'Nes_10.0_100.0': 0.5506807, 'L': -59085…	steps_3	FALSE	65779.3	0.500169	2.8166e-11	2.8166e-10	0.499831	{'L': -32884.6279491932, 'seed': 0.0, 'Nes_0.0_0.1': 0.5001694, 'nspikes': 3.0, 'fix_prob': 0.500169, 's2': -0.1047616, 's3': -0.1057547, 'meanH': -0.2105807, 'AIC': 65779.2558983864, 'Nes_10.0_100.0': 0.4998306, 'p2': 3.278574e-10, 'ranrep': 10.0, 'p3': 0.4998306, 'p1': 0.5001694, 'f0': 0.993956, 'model': 'steps_3', 's1': -1.989595e-10, 'acc': 0.0, 'Nes_1.0_10.0': 2.816602e-10, 'mean2': -0.00553…	steps_3	FALSE	30181.9	0.0438734	0.39486	0.0280164	0.53325	{'AIC': 30181.93720906564, 'fix_prob': 0.275597, 'selmode': 1.0, 'model': 'steps_3', 'p3': 0.5332498, 'f0': 0.993574, 'meanH': -0.004201208, 'Nes_0.1_1.0': 0.3948604, 'Nes_0.0_0.1': 0.04387338, 'mean2': -0.007193029, 'L': -15085.96860453282, 'ranrep': 10.0, 'Nes_10.0_100.0': 0.5332498, 's1': -0.01063857, 'Nes_1.0_10.0': 0.02801636, 's2': -0.1158974, 'p2': 2.058158e-10, 'nspikes': 3.0, 'mean': -0.…
spikes_4	FALSE	118185	0	0.449483	0	0.550517	{'s4': -0.165383, 'p1': 0.3246307, 'mean': -0.09185913, 'ranrep': 10.0, 'AIC': 118185.16199993624, 'f0': 0.990614, 'p2': 0.1238304, 'seed': 0.0, 'model': 'spikes_4', 'fix_prob': 0.357341, 'mean2': -0.01499025, 'Nes_0.1_1.0': 0.449483, 'p4': 0.550517, 's1': -0.002051908, 'nspikes': 4.0, 'Nes_0.0_0.1': 0.0, 'acc': 0.0, 's3': -0.002962272, 'Nes_1.0_10.0': 0.0, 'selmode': 0.0, 'Nes_10.0_100.0': 0.550…	spikes_4	FALSE	65783.3	0.50017	0	8.00757e-09	0.49983	{'L': -32884.627949199064, 'seed': 0.0, 'Nes_0.0_0.1': 0.5001699, 'nspikes': 4.0, 'fix_prob': 0.50017, 's2': -0.0302624, 's3': -0.04210399, 'f0': 0.993956, 'AIC': 65783.25589839813, 's4': -0.1052572, 'Nes_10.0_100.0': 0.4998301, 'p2': 5.746954e-11, 'ranrep': 10.0, 'p3': 7.950097e-09, 'p1': 0.5001699, 'p4': 0.4998301, 'model': 'spikes_4', 's1': -7.110996e-13, 'meanH': -0.2100714, 'acc': 0.0, 'Nes_…	spikes_4	FALSE	30185.9	0	0.46596	0	0.53404	{'AIC': 30185.936310186276, 'fix_prob': 0.266233, 'selmode': 0.0, 'model': 'spikes_4', 'p3': 4.787674e-06, 'f0': 0.993574, 'meanH': -0.01063757, 'Nes_0.1_1.0': 0.4659597, 'Nes_0.0_0.1': 0.0, 's4': -0.116, 'mean2': -0.007198946, 'L': -15085.968155093138, 'ranrep': 10.0, 'Nes_10.0_100.0': 0.5340403, 's1': -0.005054735, 'Nes_1.0_10.0': 0.0, 's2': -0.005595461, 'p2': 0.1136785, 'p4': 0.5340355, 'nspi…
steps_4	FALSE	118185	0.0760388	0.373565	2.25086e-12	0.550396	{'s4': -0.1659112, 'p1': 0.1960719, 'mean': -0.09206018, 'ranrep': 10.0, 'AIC': 118185.16222778537, 'f0': 0.990614, 'p2': 0.2535316, 'seed': 0.0, 'model': 'steps_4', 'fix_prob': 0.358283, 'mean2': -0.01506607, 'Nes_0.1_1.0': 0.3735647, 'p4': 0.5503965, 's1': -0.002578578, 'nspikes': 4.0, 'Nes_0.0_0.1': 0.07603877, 'acc': 0.0, 's3': -0.1649607, 'Nes_1.0_10.0': 2.250862e-12, 'selmode': 1.0, 'Nes_10…	steps_4	FALSE	65783.3	0.50017	7.2411e-11	5.00177e-11	0.499831	{'L': -32884.627949192945, 'seed': 0.0, 'Nes_0.0_0.1': 0.5001695, 'nspikes': 4.0, 'fix_prob': 0.50017, 's2': -0.01308192, 's3': -0.1051025, 'f0': 0.993956, 'AIC': 65783.25589838589, 's4': -0.1056371, 'Nes_10.0_100.0': 0.4998305, 'p2': 1.048605e-10, 'ranrep': 10.0, 'p3': 2.670215e-11, 'p1': 0.5001695, 'p4': 0.4998305, 'model': 'steps_4', 's1': -4.87615e-05, 'meanH': -0.2105807, 'acc': 0.0, 'Nes_1.…	steps_4	FALSE	30185.9	0.0250181	0.440136	2.36556e-07	0.534845	{'AIC': 30185.936617353185, 'fix_prob': 0.270694, 'selmode': 1.0, 'model': 'steps_4', 'p3': 2.845687e-07, 'f0': 0.993574, 'meanH': -0.005738545, 'Nes_0.1_1.0': 0.4401361, 'Nes_0.0_0.1': 0.02501811, 's4': -0.1165415, 'mean2': -0.007174742, 'L': -15085.968308676593, 'ranrep': 10.0, 'Nes_10.0_100.0': 0.5348455, 's1': -0.005562837, 'Nes_1.0_10.0': 2.36556e-07, 's2': -0.006742728, 'p2': 0.3259826, 'p4…
spikes_5	FALSE	118189	0	0.449483	0	0.550517	{'s4': -0.1644447, 'p1': 0.4187968, 'mean': -0.09173476, 'ranrep': 10.0, 'mean2': -0.01498962, 'f0': 0.990614, 'p2': 0.03014825, 'seed': 0.0, 'model': 'spikes_5', 'fix_prob': 0.35734, 'p5': 0.5505162, 'Nes_0.1_1.0': 0.4494833, 'p4': 4.855472e-07, 's1': -0.002210195, 's3': -0.002651261, 'nspikes': 5.0, 'Nes_0.0_0.1': 0.0, 'acc': 0.0, 'Nes_1.0_10.0': 0.0, 's5': -0.165383, 'selmode': 0.0, 'Nes_10.0_…	spikes_5	FALSE	65787.3	0.500159	1.40467e-07	0	0.49984	{'L': -32884.62795166268, 'seed': 0.0, 'Nes_0.0_0.1': 0.5001595, 'nspikes': 5.0, 'fix_prob': 0.500159, 's2': -0.009170766, 's3': -0.009208047, 'f0': 0.993956, 'AIC': 65787.25590332536, 's4': -0.1047483, 'Nes_10.0_100.0': 0.4998404, 'p2': 1.349047e-07, 'ranrep': 10.0, 'p3': 5.561826e-09, 'p1': 0.5001595, 'selmode': 0.0, 's5': -0.1052862, 'model': 'spikes_5', 's1': -3.357793e-09, 'meanH': -0.210066…	spikes_5	FALSE	30189.9	0	0.466072	6.29716e-11	0.533928	{'AIC': 30189.936340887452, 'fix_prob': 0.266494, 'selmode': 0.0, 'model': 'spikes_5', 'p3': 6.29716e-11, 'f0': 0.993574, 'meanH': -0.01093301, 'Nes_0.1_1.0': 0.466072, 'Nes_0.0_0.1': 0.0, 's4': -0.1147709, 'mean2': -0.007198214, 'L': -15085.968170443726, 'ranrep': 10.0, 'Nes_10.0_100.0': 0.533928, 's1': -0.004730693, 'Nes_1.0_10.0': 6.29716e-11, 's5': -0.1160024, 'p5': 0.5336323, 'p2': 0.190535,…
steps_5	FALSE	118189	0.0921335	0.357586	2.51462e-09	0.55028	{'s4': -0.1654236, 'p1': 0.0001537313, 'mean': -0.09207031, 'ranrep': 10.0, 'mean2': -0.01507144, 'f0': 0.990614, 'p2': 0.4494158, 'seed': 0.0, 'model': 'steps_5', 'fix_prob': 0.358859, 'p5': 0.5502801, 'Nes_0.1_1.0': 0.3575864, 'p4': 4.497998e-09, 's1': -0.0001210645, 's3': -0.004437001, 'nspikes': 5.0, 'Nes_0.0_0.1': 0.09213348, 'acc': 0.0, 'Nes_1.0_10.0': 2.514618e-09, 's5': -0.16557, 'selmode…	steps_5	FALSE	65787.3	0.50017	3.34354e-10	3.34354e-09	0.49983	{'L': -32884.627949194844, 'seed': 0.0, 'Nes_0.0_0.1': 0.5001699, 'nspikes': 5.0, 'fix_prob': 0.50017, 's2': -4.049099e-05, 's3': -4.940769e-05, 'f0': 0.993956, 'AIC': 65787.25589838969, 's4': -0.1050722, 'Nes_10.0_100.0': 0.4998301, 'p2': 0.05674616, 'ranrep': 10.0, 'p3': 0.002999331, 'p1': 0.4404244, 'selmode': 1.0, 's5': -0.1056476, 'model': 'steps_5', 's1': -3.387336e-06, 'meanH': -0.2105809,…	steps_5	FALSE	30189.9	0.0164878	0.450752	1.16272e-07	0.53276	{'AIC': 30189.93653349349, 'fix_prob': 0.268065, 'selmode': 1.0, 'model': 'steps_5', 'p3': 0.1418548, 'f0': 0.993575, 'meanH': -0.006823163, 'Nes_0.1_1.0': 0.4507517, 'Nes_0.0_0.1': 0.01648785, 's4': -0.1161052, 'mean2': -0.007227447, 'L': -15085.968266746744, 'ranrep': 10.0, 'Nes_10.0_100.0': 0.5327603, 's1': -0.005470585, 'Nes_1.0_10.0': 1.162718e-07, 's5': -0.1167213, 'p5': 0.5327603, 'p2': 0.…
six_spikes	FALSE	118186	0.243393	0	0.252538	0.502705	{'s4': -0.1, 'p1': 0.2433933, 'mean': -0.1442609, 'ranrep': 1.0, 'mean2': -0.06047319, 'f0': 0.990608, 'p2': 0.2523756, 'seed': 0.0, 'model': 'six_spikes', 'fix_prob': 0.322792, 'p5': 0.2252374, 'p6': 0.001363525, 'Nes_0.1_1.0': 0.0, 'p4': 0.277468, 's1': 0.0, 'nspikes': 6.0, 'Nes_0.0_0.1': 0.2433933, 'acc': 0.0, 's3': -0.05, 's5': -0.5, 'selmode': 5.0, 'Nes_10.0_100.0': 0.5027054, 'L': -59087.88…	six_spikes	FALSE	65785	0.360807	0	0.322897	0.313502	{'p6': 0.002794228, 'L': -32887.514382264, 'seed': 0.0, 'Nes_0.0_0.1': 0.3608066, 'nspikes': 6.0, 'fix_prob': 0.415665, 's2': -0.01, 's3': -0.05, 'f0': 0.993803, 'AIC': 65785.028764528, 's4': -0.1, 'Nes_10.0_100.0': 0.3135019, 'p2': 0.1741533, 'ranrep': 1.0, 'p3': 0.148744, 'p1': 0.3608066, 'p4': 0.1138147, 'selmode': 5.0, 's5': -0.5, 'model': 'six_spikes', 's1': 0.0, 'meanH': -0.04559854, 'acc':…	six_spikes	FALSE	30183.4	0.136712	0	0.569947	0.293274	{'AIC': 30183.41115418584, 'fix_prob': 0.239701, 'selmode': 5.0, 'model': 'six_spikes', 'p3': 0.2429451, 'f0': 0.993567, 'meanH': -0.02543732, 'Nes_0.1_1.0': 0.0, 'Nes_0.0_0.1': 0.1367115, 's4': -0.1, 'mean2': -0.03902645, 'L': -15086.70557709292, 'Nes_1.0_10.0': 0.5699465, 'ranrep': 1.0, 'Nes_10.0_100.0': 0.2932745, 's1': 0.0, 's6': -1.0, 's5': -0.5, 'p5': 0.1474422, 'p2': 0.3270013, 'acc': 0.0,…
lognormal	TRUE	116947	0.593663	0.0384245	0.0371456	0.0355494	{'mean': -1.759428, 'ranrep': 1.0, 'AIC': 116947.00070333386, 'f0': 0.988292, 'logmean': -12.481903, 'model': 'lognormal', 'Nw': 115.000989, 'fix_prob': 0.620703, 'mean2': -86.81087, 'seed': 0.0, 'Nes_0.1_1.0': 0.03842448, 'nspikes': 0.0, 'Nes_0.0_0.1': 0.5936631, 'acc': 0.0, 'Nes_1.0_10.0': 0.03714564, 'selmode': 4.0, 't': 18.005162, 'L': -58471.50035166693, 'meanH': -0.004300206, 'Nes_10.0_100.…	lognormal	TRUE	65185.7	0.595524	0.0995373	0.086866	0.0705665	{'logsigma': 8.576694, 'seed': 0.0, 'Nes_0.0_0.1': 0.5955236, 'nspikes': 0.0, 'N2': 495.0, 'fix_prob': 0.667152, 'L': -32590.869677340714, 'AIC': 65185.73935468143, 't': 4.367803, 'Nes_10.0_100.0': 0.07056654, 'ranrep': 1.0, 'Nes_0.1_1.0': 0.09953726, 'f0': 0.990682, 'Nw': 107.760474, 'model': 'lognormal', 'meanH': -0.001305671, 'acc': 0.0, 'logmean': -9.056145, 'mean2': -76.09419, 'selmode': 4.0…	lognormal	TRUE	29828	0.709956	4.94007e-11	4.94007e-11	4.94007e-11	{'AIC': 29828.020896686307, 'fix_prob': 0.709956, 'logmean': -8827779884.545849, 'selmode': 4.0, 't': 206.223738, 'model': 'lognormal', 'Nes_0.1_1.0': 4.940071e-11, 'f0': 0.992133, 'meanH': -3738086.0, 'mean2': -1.512235e-07, 'L': -14912.010448343153, 'logsigma': 15956064051.37756, 'ranrep': 1.0, 'Nes_10.0_100.0': 4.940071e-11, 'Nes_0.0_0.1': 0.7099558, 'Nes_1.0_10.0': 4.940071e-11, 'Nw': 247.625…
gamma	TRUE	116947	0.59475	0.0355117	0.0376321	0.039879	{'mean': -2.45446, 'ranrep': 1.0, 'AIC': 116946.9058577309, 'f0': 0.988293, 'model': 'gamma', 'Nw': 115.000989, 'fix_prob': 0.619823, 'mean2': -124.4652, 'seed': 0.0, 'Nes_0.1_1.0': 0.03551172, 'E(s)': -34837.466611, 'nspikes': 0.0, 'Nes_0.0_0.1': 0.5947502, 'acc': 0.0, 'Nes_1.0_10.0': 0.03763207, 'selmode': 2.0, 't': 18.005162, 'L': -58471.45292886545, 'beta': 0.025186, 'meanH': -0.004973918, 'N…	gamma	TRUE	65186.2	0.649871	0.0583171	0.0635377	0.0691014	{'L': -32591.107738060513, 'seed': 0.0, 'Nes_0.0_0.1': 0.649871, 'E(s)': -6.196419, 'nspikes': 0.0, 'N2': 495.0, 'beta': 0.037322, 'fix_prob': 0.692033, 'meanH': -0.002550844, 'AIC': 65186.215476121026, 't': 4.367803, 'Nes_10.0_100.0': 0.06910144, 'ranrep': 1.0, 'f0': 0.990678, 'model': 'gamma', 'acc': 0.0, 'Nes_0.1_1.0': 0.05831709, 'mean2': -126.0131, 'selmode': 2.0, 'Nw': 107.760474, 'mean': -…	gamma	TRUE	29824.5	0.504413	0.0868074	0.101641	0.117891	{'AIC': 29824.491219696178, 'fix_prob': 0.566644, 'selmode': 2.0, 't': 206.223738, 'model': 'gamma', 'Nes_0.1_1.0': 0.08680743, 'f0': 0.992125, 'meanH': -0.00174271, 'beta': 0.06897, 'E(s)': -0.957147, 'mean2': -14.08861, 'L': -14910.245609848089, 'ranrep': 1.0, 'Nes_10.0_100.0': 0.1178911, 'Nes_0.0_0.1': 0.5044134, 'Nes_1.0_10.0': 0.1016413, 'Nw': 247.625277, 'nspikes': 0.0, 'mean': -0.9524889, …
beta	TRUE	116942	0.631744	4.44968e-10	4.59294e-10	8.18206e-10	{'mean': -0.3682556, 'ranrep': 1.0, 'AIC': 116942.27883914034, 'f0': 0.988293, 'model': 'beta', 'Nw': 115.000989, 'fix_prob': 0.631744, 'mean2': -0.3682556, 'beta_scaler': -0.4410447, 'seed': 0.0, 'Nes_0.1_1.0': 4.449678e-10, 'nspikes': 0.0, 'Nes_0.0_0.1': 0.6317444, 'acc': 0.0, 'Nes_1.0_10.0': 4.592939e-10, 'selmode': 3.0, 't': 18.005162, 'L': -58469.13941957017, 'beta': 5.229785e-10, 'meanH': -…	beta	TRUE	65188.3	0.677351	0.0398991	0.0435618	0.0858046	{'L': -32592.172320040263, 'seed': 0.0, 'Nes_0.0_0.1': 0.677351, 'nspikes': 0.0, 'N2': 495.0, 'beta': 0.1005208, 'fix_prob': 0.70619, 'alpha': 0.0247776, 'meanH': -0.003540184, 'AIC': 65188.344640080526, 't': 4.367803, 'Nes_10.0_100.0': 0.08580458, 'ranrep': 1.0, 'f0': 0.990711, 'beta_scaler': 0.01477978, 'model': 'beta', 'acc': 0.0, 'Nes_0.1_1.0': 0.03989914, 'mean2': -0.1805056, 'selmode': 3.0,…	beta	TRUE	29822.2	0.614968	0.0259577	0.0274307	0.0337295	{'AIC': 29822.185737266103, 'fix_prob': 0.633512, 'selmode': 3.0, 't': 206.223738, 'model': 'beta', 'beta_scaler': -0.2194765, 'Nes_0.1_1.0': 0.02595774, 'f0': 0.992086, 'meanH': -0.005241011, 'beta': 0.04317497, 'mean2': -0.2818333, 'L': -14909.092868633052, 'ranrep': 1.0, 'Nes_10.0_100.0': 0.03372945, 'Nes_0.0_0.1': 0.6149679, 'Nes_1.0_10.0': 0.02743072, 'alpha': 0.01792854, 'Nw': 247.625277, '…
spikes_2	TRUE	116944	0.63522	0	0	0	{'p1': 0.6352202, 'mean': -0.3647798, 'ranrep': 10.0, 'AIC': 116944.16796127768, 'f0': 0.988288, 'p2': 0.3647798, 'Nw': 115.000989, 'model': 'spikes_2', 'fix_prob': 0.63522, 'mean2': -0.3647798, 'seed': 0.0, 'Nes_0.1_1.0': 0.0, 's2': -1.276967, 'nspikes': 2.0, 'Nes_0.0_0.1': 0.6352202, 'acc': 0.0, 'Nes_1.0_10.0': 0.0, 'selmode': 0.0, 't': 18.005162, 'L': -58469.08398063884, 's1': -1.145107e-12, '…	spikes_2	TRUE	65185.4	0	0.833256	0	0	{'L': -32589.71081972568, 'seed': 0.0, 'Nes_0.0_0.1': 0.0, 'nspikes': 2.0, 'N2': 495.0, 'fix_prob': 0.472019, 's2': -102.4191, 'meanH': -0.007201344, 'AIC': 65185.42163945136, 't': 4.367803, 'Nes_10.0_100.0': 0.0, 'p2': 0.1667444, 'ranrep': 10.0, 'p1': 0.8332556, 'f0': 0.990678, 'Nw': 107.760474, 'model': 'spikes_2', 's1': -0.004966789, 'acc': 0.0, 'Nes_0.1_1.0': 0.8332556, 'mean2': -2.5e-05, 'se…	spikes_2	TRUE	29821.2	0.630326	0	0	0.369674	{'AIC': 29821.23729398453, 'fix_prob': 0.630326, 'selmode': 0.0, 't': 206.223738, 'model': 'spikes_2', 'Nes_0.1_1.0': 0.0, 'f0': 0.992082, 'meanH': -0.8656268, 'Nes_0.0_0.1': 0.6303257, 'mean2': -0.03785465, 'L': -14907.618646992265, 'ranrep': 10.0, 'Nes_10.0_100.0': 0.3696743, 's1': -3.213152e-14, 'Nes_1.0_10.0': 0.0, 's2': -0.3184537, 'Nw': 247.625277, 'p2': 0.3696743, 'nspikes': 2.0, 'mean': -…
steps_2	TRUE	116946	0.634636	0.000635533	0.00635533	0.0635533	{'p1': 0.6345682, 'mean': -0.8120774, 'ranrep': 10.0, 'AIC': 116946.0293778815, 'f0': 0.988289, 'p2': 0.3654318, 'Nw': 115.000989, 'model': 'steps_2', 'fix_prob': 0.635149, 'mean2': -2.422715, 'seed': 0.0, 'Nes_0.1_1.0': 0.0006355334, 's2': -4.5, 'nspikes': 2.0, 'Nes_0.0_0.1': 0.6346358, 'acc': 0.0, 'Nes_1.0_10.0': 0.006355334, 'selmode': 1.0, 't': 18.005162, 'L': -58470.01468894075, 's1': -3.680…	steps_2	TRUE	65185.4	0.0763591	0.687232	0.0703191	1.62622e-11	{'L': -32589.70646035295, 'seed': 0.0, 'Nes_0.0_0.1': 0.07635907, 'nspikes': 2.0, 'N2': 495.0, 'fix_prob': 0.490822, 's2': -8529968000.0, 'meanH': -0.002764627, 'AIC': 65185.4129207059, 't': 4.367803, 'Nes_10.0_100.0': 1.626221e-11, 'p2': 0.1660902, 'ranrep': 10.0, 'p1': 0.8339098, 'f0': 0.990678, 'Nw': 107.760474, 'model': 'steps_2', 's1': -0.01013442, 'acc': 0.0, 'Nes_0.1_1.0': 0.6872316, 'mean…	steps_2	TRUE	29822.5	0.619703	0.00178441	0.0178441	0.178441	{'AIC': 29822.48411758192, 'fix_prob': 0.621154, 'selmode': 1.0, 't': 206.223738, 'model': 'steps_2', 'Nes_0.1_1.0': 0.001784413, 'f0': 0.992093, 'meanH': -0.2119428, 'Nes_0.0_0.1': 0.6197028, 'mean2': -0.07599929, 'L': -14908.24205879096, 'ranrep': 10.0, 'Nes_10.0_100.0': 0.1784413, 's1': -4.964009e-05, 'Nes_1.0_10.0': 0.01784413, 's2': -0.775, 'Nw': 247.625277, 'p2': 0.3804711, 'nspikes': 2.0, …
spikes_3	TRUE	116948	0.63522	0	0	0	{'p1': 0.6350788, 'mean': -0.3647802, 'ranrep': 10.0, 'AIC': 116948.1679612785, 'f0': 0.988288, 'p2': 0.0001409995, 'Nw': 115.000989, 'model': 'spikes_3', 'fix_prob': 0.63522, 'mean2': -0.3647802, 'seed': 0.0, 'Nes_0.1_1.0': 0.0, 's2': -4.286392e-09, 'nspikes': 3.0, 'Nes_0.0_0.1': 0.6352198, 'acc': 0.0, 's3': -1.276971, 'Nes_1.0_10.0': 0.0, 'selmode': 0.0, 't': 18.005162, 'L': -58469.08398063925,…	spikes_3	TRUE	65189.4	0	0.833341	0	0	{'L': -32589.71079497322, 'seed': 0.0, 'Nes_0.0_0.1': 0.0, 'nspikes': 3.0, 'N2': 495.0, 'fix_prob': 0.47788, 's2': -0.006319587, 's3': -95.00362, 'f0': 0.990678, 'AIC': 65189.42158994644, 't': 4.367803, 'Nes_10.0_100.0': 0.0, 'p2': 0.4822613, 'ranrep': 10.0, 'p3': 0.1666594, 'p1': 0.3510793, 'Nw': 107.760474, 'model': 'spikes_3', 's1': -0.00316936, 'meanH': -0.005065726, 'acc': 0.0, 'Nes_0.1_1.0'…	spikes_3	TRUE	29825.2	0.630326	0	7.91015e-12	0.369674	{'AIC': 29825.237293984406, 'fix_prob': 0.630326, 'selmode': 0.0, 't': 206.223738, 'model': 'spikes_3', 'p3': 0.3696743, 'f0': 0.992082, 'meanH': -0.8656268, 'Nes_0.1_1.0': 0.0, 'N2': 372.0, 'Nes_0.0_0.1': 0.6303257, 'mean2': -0.03785465, 'L': -14907.618646992203, 'ranrep': 10.0, 'Nes_10.0_100.0': 0.3696743, 's1': -3.240089e-14, 'Nes_1.0_10.0': 7.910149e-12, 's2': -0.03494907, 'Nw': 247.625277, '…
steps_3	TRUE	116948	0.63522	8.18658e-20	8.18658e-19	8.18658e-18	{'p1': 0.6352203, 'mean': -0.4658147, 'ranrep': 10.0, 'AIC': 116948.16796127715, 'f0': 0.988288, 'p2': 1.031346e-17, 'Nw': 115.000989, 'model': 'steps_3', 'fix_prob': 0.63522, 'mean2': -0.6678846, 'seed': 0.0, 'Nes_0.1_1.0': 8.186584e-20, 's2': -0.9859226, 'nspikes': 3.0, 'Nes_0.0_0.1': 0.6352203, 'acc': 0.0, 's3': -1.696932, 'Nes_1.0_10.0': 8.186584e-19, 'selmode': 1.0, 't': 18.005162, 'L': -584…	steps_3	TRUE	65189.4	0.0763585	0.687226	0.0703261	8.88227e-14	{'L': -32589.70646035326, 'seed': 0.0, 'Nes_0.0_0.1': 0.07635848, 'nspikes': 3.0, 'N2': 495.0, 'fix_prob': 0.49082, 's2': -54.09639, 's3': -924489400.0, 'f0': 0.990678, 'AIC': 65189.41292070652, 't': 4.367803, 'Nes_10.0_100.0': 8.882273e-14, 'p2': 5.752121e-12, 'ranrep': 10.0, 'p3': 0.1660892, 'p1': 0.8339108, 'Nw': 107.760474, 'model': 'steps_3', 's1': -0.01013451, 'meanH': -0.002764641, 'acc': …	steps_3	TRUE	29825.2	0.630326	1.62391e-17	1.62391e-16	0.369674	{'AIC': 29825.237293984243, 'fix_prob': 0.630326, 'selmode': 1.0, 't': 206.223738, 'model': 'steps_3', 'p3': 0.3696744, 'f0': 0.992082, 'meanH': -0.8613345, 'Nes_0.1_1.0': 1.623908e-17, 'N2': 372.0, 'Nes_0.0_0.1': 0.6303256, 'mean2': -0.0374949, 'L': -14907.618646992121, 'ranrep': 10.0, 'Nes_10.0_100.0': 0.3696744, 's1': -3.185891e-16, 'Nes_1.0_10.0': 1.623908e-16, 's2': -0.3135302, 'Nw': 247.625…
spikes_4	TRUE	116952	0.63522	0	0	0	{'s4': -1.276972, 'p1': 0.6351865, 'mean': -0.3647801, 'ranrep': 10.0, 'AIC': 116952.16796129159, 'f0': 0.988288, 'p2': 3.134201e-05, 'Nw': 115.000989, 'model': 'spikes_4', 'fix_prob': 0.63522, 'mean2': -0.3647801, 'seed': 0.0, 'Nes_0.1_1.0': 0.0, 'p4': 0.3647801, 's2': -3.766363e-07, 'nspikes': 4.0, 'Nes_0.0_0.1': 0.6352199, 'acc': 0.0, 's3': -9.484573e-07, 'Nes_1.0_10.0': 0.0, 'selmode': 0.0, '…	spikes_4	TRUE	65193.4	0.103225	0.730138	0	0	{'L': -32589.710784049505, 'seed': 0.0, 'Nes_0.0_0.1': 0.1032247, 'nspikes': 4.0, 'N2': 495.0, 'fix_prob': 0.480605, 's2': -0.005690798, 's3': -0.005701223, 'f0': 0.990678, 'AIC': 65193.42156809901, 's4': -144.8897, 't': 4.367803, 'Nes_10.0_100.0': 0.0, 'p2': 0.02313118, 'ranrep': 10.0, 'p3': 0.7070068, 'p1': 0.1032247, 'p4': 0.1666374, 'model': 'spikes_4', 's1': -2.037394e-10, 'meanH': -0.009860…	spikes_4	TRUE	29829.2	0.630326	3.24923e-09	0	0.369674	{'AIC': 29829.23729398762, 'fix_prob': 0.630326, 'selmode': 0.0, 't': 206.223738, 'model': 'spikes_4', 'p3': 3.249228e-09, 'f0': 0.992082, 'meanH': -0.8656221, 'Nes_0.1_1.0': 3.249228e-09, 'N2': 372.0, 'Nes_0.0_0.1': 0.6303263, 's4': -0.3184553, 'mean2': -0.03785459, 'L': -14907.61864699381, 'ranrep': 10.0, 'Nes_10.0_100.0': 0.3696737, 's1': -2.969682e-15, 'Nes_1.0_10.0': 0.0, 's2': -2.920975e-10…
steps_4	TRUE	116952	0.63522	1.28615e-13	1.28615e-12	1.28615e-11	{'s4': -1.698069, 'p1': 0.6002137, 'mean': -0.4658159, 'ranrep': 10.0, 'AIC': 116952.16796127823, 'f0': 0.988288, 'p2': 0.03500665, 'Nw': 115.000989, 'model': 'steps_4', 'fix_prob': 0.63522, 'mean2': -0.6678884, 'seed': 0.0, 'Nes_0.1_1.0': 1.286153e-13, 'p4': 0.3647797, 's2': -6.582318e-06, 'nspikes': 4.0, 'Nes_0.0_0.1': 0.6352203, 'acc': 0.0, 's3': -0.9829642, 'Nes_1.0_10.0': 1.286153e-12, 'selm…	steps_4	TRUE	65193.4	2.76084e-12	0.83391	1.32701e-07	1.32701e-06	{'L': -32589.706612917675, 'seed': 0.0, 'Nes_0.0_0.1': 2.760841e-12, 'nspikes': 4.0, 'N2': 495.0, 'fix_prob': 0.470338, 's2': -0.005190343, 's3': -0.005499059, 'f0': 0.990678, 'AIC': 65193.41322583535, 's4': -104533.0, 't': 4.367803, 'Nes_10.0_100.0': 1.327006e-06, 'p2': 0.6207204, 'ranrep': 10.0, 'p3': 0.2131897, 'p1': 1.534584e-11, 'p4': 0.1660899, 'model': 'steps_4', 's1': -0.005158101, 'meanH…	steps_4	TRUE	29829.2	0.630325	1.039e-13	1.039e-12	0.369675	{'AIC': 29829.237293984566, 'fix_prob': 0.630325, 'selmode': 1.0, 't': 206.223738, 'model': 'steps_4', 'p3': 8.968169e-12, 'f0': 0.992082, 'meanH': -0.8613271, 'Nes_0.1_1.0': 1.038999e-13, 'N2': 372.0, 'Nes_0.0_0.1': 0.6303254, 's4': -0.321962, 'mean2': -0.03749434, 'L': -14907.618646992283, 'ranrep': 10.0, 'Nes_10.0_100.0': 0.3696746, 's1': -9.245694e-06, 'Nes_1.0_10.0': 1.038999e-12, 's2': -9.9…
spikes_5	TRUE	116956	0.635227	0	0	0	{'s4': -0.0007717549, 'p1': 0.6318405, 'mean': -0.3647729, 'ranrep': 10.0, 'mean2': -0.3647729, 'f0': 0.988288, 'p2': 0.001771699, 'Nw': 115.000989, 'model': 'spikes_5', 'fix_prob': 0.635227, 'p5': 0.3647729, 'seed': 0.0, 'Nes_0.1_1.0': 0.0, 'p4': 2.840213e-06, 's2': -1.566204e-07, 'nspikes': 5.0, 'Nes_0.0_0.1': 0.6352271, 'acc': 0.0, 's3': -4.880417e-07, 's5': -1.277281, 'selmode': 0.0, 't': 18.…	spikes_5	TRUE	65197.4	0.145994	0.687467	0	0	{'L': -32589.710784897532, 'seed': 0.0, 'Nes_0.0_0.1': 0.145994, 'nspikes': 5.0, 'N2': 495.0, 'fix_prob': 0.487021, 's2': -1.687565e-06, 's3': -0.005106168, 'f0': 0.990678, 'AIC': 65197.421569795064, 's4': -0.007593856, 't': 4.367803, 'Nes_10.0_100.0': 0.0, 'p2': 0.145994, 'ranrep': 10.0, 'p3': 0.4149668, 'p1': 3.563737e-08, 'p4': 0.2725004, 'selmode': 0.0, 'p5': 0.1665388, 'model': 'spikes_5', '…	spikes_5	TRUE	29833.2	0.630333	1.00793e-07	0	0.369667	{'AIC': 29833.237299048524, 'fix_prob': 0.630333, 'selmode': 0.0, 't': 206.223738, 'model': 'spikes_5', 'p3': 3.827126e-08, 'f0': 0.992083, 'meanH': -0.8627092, 'Nes_0.1_1.0': 1.007935e-07, 'N2': 372.0, 'Nes_0.0_0.1': 0.6303331, 's4': -0.001162311, 'mean2': -0.03785388, 'L': -14907.618649524262, 'ranrep': 10.0, 'Nes_10.0_100.0': 0.3696668, 's1': -3.138288e-09, 'Nes_1.0_10.0': 0.0, 's2': -6.065046…
steps_5	TRUE	116956	0.63522	1.29564e-12	1.29563e-11	1.29563e-10	{'s4': -1.027249, 'p1': 0.4345947, 'mean': -0.4658144, 'ranrep': 10.0, 'mean2': -0.6678838, 'f0': 0.988288, 'p2': 0.2005868, 'Nw': 115.000989, 'model': 'steps_5', 'fix_prob': 0.63522, 'p5': 0.3647798, 'seed': 0.0, 'Nes_0.1_1.0': 1.295635e-12, 'p4': 1.700602e-10, 's2': -2.354177e-05, 'nspikes': 5.0, 'Nes_0.0_0.1': 0.6352202, 'acc': 0.0, 's3': -3.515864e-05, 's5': -1.6811, 'selmode': 1.0, 't': 18.0…	steps_5	TRUE	65197.4	0.243625	0.590429	5.29081e-07	5.51453e-06	{'L': -32589.706569041766, 'seed': 0.0, 'Nes_0.0_0.1': 0.2436248, 'nspikes': 5.0, 'N2': 495.0, 'fix_prob': 0.500979, 's2': -0.008356175, 's3': -0.008509193, 'f0': 0.990678, 'AIC': 65197.41313808353, 's4': -0.01285253, 't': 4.367803, 'Nes_10.0_100.0': 5.51453e-06, 'p2': 0.1713797, 'ranrep': 10.0, 'p3': 0.4380816, 'p1': 0.2245925, 'p4': 1.479716e-09, 'selmode': 1.0, 'p5': 0.1659462, 'model': 'steps…	steps_5	TRUE	29833.2	0.630326	2.05171e-10	2.05171e-09	0.369674	{'AIC': 29833.237294081533, 'fix_prob': 0.630326, 'selmode': 1.0, 't': 206.223738, 'model': 'steps_5', 'p3': 8.104419e-10, 'f0': 0.992082, 'meanH': -0.8613355, 'Nes_0.1_1.0': 2.051713e-10, 'N2': 372.0, 'Nes_0.0_0.1': 0.630326, 's4': -0.3144466, 'mean2': -0.03749495, 'L': -14907.618647040767, 'ranrep': 10.0, 'Nes_10.0_100.0': 0.369674, 's1': -2.652509e-09, 'Nes_1.0_10.0': 2.051713e-09, 's2': -8.68…
six_spikes	TRUE	116988	0.506027	0	0.102135	0.391836	{'s4': -0.08695577, 'p1': 0.506027, 'mean': -0.1198372, 'ranrep': 1.0, 'mean2': -0.04521651, 'f0': 0.988376, 'p2': 1.887109e-06, 'Nw': 115.000989, 'model': 'six_spikes', 'fix_prob': 0.506075, 'p5': 0.2371828, 'seed': 0.0, 'p6': 1.992064e-06, 'Nes_0.1_1.0': 0.0, 'p4': 0.1546536, 's2': -0.008695577, 'nspikes': 6.0, 'Nes_0.0_0.1': 0.506027, 'acc': 0.0, 's3': -0.04347789, 's5': -0.4347789, 'selmode':…	six_spikes	TRUE	65216.4	0.493181	0	0.135369	0.371175	{'p6': 0.0002746407, 'L': -32603.201970362014, 'seed': 0.0, 'Nes_0.0_0.1': 0.4931813, 'nspikes': 6.0, 'N2': 495.0, 's6': -1.0, 'fix_prob': 0.523471, 's2': -0.00927984, 's3': -0.0463992, 'f0': 0.990476, 'AIC': 65216.40394072403, 's4': -0.0927984, 't': 4.367803, 'Nes_10.0_100.0': 0.3711751, 'p2': 0.09453393, 'ranrep': 1.0, 'p3': 0.04083508, 'p1': 0.4931813, 'p4': 0.009477954, 'selmode': 5.0, 'p5': …	six_spikes	TRUE	29827.8	0.574409	0	0.0244933	0.401034	{'AIC': 29827.794113709548, 'fix_prob': 0.575613, 'selmode': 5.0, 't': 206.223738, 'model': 'six_spikes', 'p3': 0.02071509, 'f0': 0.992071, 'meanH': -0.2080966, 'Nes_0.1_1.0': 0.0, 'N2': 372.0, 'Nes_0.0_0.1': 0.5744094, 's4': -0.0403836, 'mean2': -0.01453908, 'L': -14908.897056854774, 'Nes_1.0_10.0': 0.02449329, 'ranrep': 1.0, 'Nes_10.0_100.0': 0.4010337, 's1': 0.0, 's6': -1.0, 's2': -0.00403836,…

## Sheet: 9
Normalized dS negative control (other motif sets). All simulations use ancestral CpG filtering.
simulation	ESR	RESCUE	PESE	Ke	combined
1	-0.0020202	0.0175055	-0.00406504	0.00561798	0.00190114
2	-0.00806452	0.0219298	-0.00406504	-0.00743494	0.00190114
3	-0.0020202	0.0353201	0.0268595	0.00938086	0.00954198
4	-0.0020202	-0.00863931	0.0122951	0	0.00954198
5	0.00608519	0.010917	-0.00203666	0.011257	0.00954198
6	-0.0120724	-0.004329	-0.00406504	-0.0184843	-0.00568182
7	0.0040568	0.0286344	-0.00203666	0.0284091	-0.0169492
8	0.0101626	-0.00649351	0.0143737	0.00938086	-0.0094518
9	0.00202429	-0.004329	0.0205761	0.0188324	0.00571429
10	-0.00604839	0.010917	0.0331263	-0.0166667	-0.00189753
11	0.0163265	-0.0021692	0.0247423	0.00561798	0.00954198
12	0.0183673	0.030837	-0.00609756	0.011257	-0.0132075
13	-0.00806452	0.0197368	-0.00203666	-0.0166667	0.00190114
14	-0.0140562	-0.0320513	-0.0201613	0.0169492	0.00954198
15	0.01222	0.0219298	0.00817996	-0.00743494	0.00190114
16	-0.00806452	-0.0341151	-0.00811359	-0.00558659	0.00190114
17	-0.0100604	0	-0.0281124	-0.00372439	0.0172414
18	-0.0040404	-0.0299145	0.0102459	0.0207547	0.00190114
19	0.0266393	0.00217391	0.0164271	0.0341556	0.0133843
20	0.00202429	0	0.00817996	-0.0166667	0.00190114
21	0.00813008	-0.0320513	0.0143737	-0.0276243	-0.0132075
22	0.00813008	-0.004329	-0.0121457	-0.0203327	-0.00189753
23	0.00202429	-0.0150862	0.00613497	0.04	-0.00189753
24	-0.0020202	-0.004329	-0.0201613	0.026465	0.0289017
25	0	0.0131004	-0.00811359	-0.0166667	0.0133843
26	-0.0298805	0.0219298	0.0122951	-0.0294118	0.00954198
27	0.0040568	-0.004329	-0.00406504	-0.0184843	-0.00568182
28	-0.00604839	0.00217391	0.0122951	-0.00558659	0.0133843
29	-0.0100604	-0.0404255	-0.0261569	-0.00929368	-0.00568182
30	-0.0180361	-0.0150862	0.0289256	-0.0166667	0.0133843
31	0.0142566	-0.0193548	-0.0221774	-0.00186567	-0.00189753
32	-0.0100604	0.0219298	0	0.0207547	-0.0206767
33	0	-0.00649351	0.0289256	-0.00186567	-0.00189753
34	0.0163265	0	0.0102459	0.00561798	0.00190114
35	-0.0140562	-0.00863931	-0.0161616	-0.00743494	0.00571429
36	-0.0040404	-0.0236052	0.0143737	-0.00558659	-0.0132075
37	0.00608519	0.0087146	-0.0161616	0.0245747	-0.0094518
38	-0.0140562	0.00434783	0.0205761	-0.012987	-0.0094518
39	0.0183673	-0.012931	-0.00406504	-0.00929368	-0.0317757
40	-0.00604839	-0.0172043	-0.00811359	-0.00186567	-0.0132075
41	0.00608519	-0.004329	-0.0261569	-0.00186567	0.00190114
42	0.0040568	0.0131004	0.00408163	0.0169492	-0.0132075
43	0.00202429	0.00217391	-0.0241449	0.00373832	0.00190114
44	0.00608519	-0.00863931	0.00613497	0.0188324	-0.0317757
45	0.0101626	0.00434783	-0.0161616	0.00186916	-0.0094518
46	-0.0140562	-0.004329	0.00613497	0.00561798	-0.00568182
47	-0.0180361	0.0153173	-0.0241449	-0.00558659	0.00571429
48	-0.0200401	-0.0278373	-0.0419162	-0.00186567	-0.0169492
49	-0.0140562	0.0219298	-0.00811359	0.0322581	0.025
50	0.0040568	-0.0021692	-0.00406504	-0.00929368	0.0133843
51	0.00202429	0.010917	0.0122951	-0.00743494	-0.00568182
52	0.01222	0.0153173	0.04158	-0.012987	-0.00568182
53	-0.0140562	-0.044586	0.00408163	-0.00558659	0.00190114
54	-0.0040404	0.0219298	-0.00811359	0.00186916	-0.00568182
55	0.0163265	-0.0320513	0.0289256	-0.00186567	-0.0132075
56	0.01222	0.0241758	0.00408163	0.00561798	0.00190114
57	-0.0020202	0.0087146	-0.00811359	-0.00743494	-0.00568182
58	-0.0040404	0.00434783	0.00408163	-0.00929368	-0.00189753
59	0.00608519	-0.00863931	0.00817996	0.0207547	0.0172414
60	0.0204499	-0.0193548	-0.01417	0.00561798	-0.0094518
61	0.00202429	0.0219298	-0.00406504	-0.00186567	0.00571429
62	-0.0180361	0.0175055	-0.0161616	0.00186916	-0.0132075
63	0.0101626	0.0175055	-0.00811359	0.00186916	0.00190114
64	-0.00604839	0.0131004	0.0289256	-0.0276243	-0.00189753
65	0.00202429	0.010917	0.0205761	0.0188324	-0.0169492
66	0.00202429	-0.00649351	-0.0121457	0.0169492	0.00954198
67	-0.00604839	-0.0172043	-0.00406504	0.0226415	-0.0094518
68	-0.0020202	-0.0466102	-0.0161616	0.00561798	0.00571429
69	-0.0120724	0.0087146	-0.00811359	0.00938086	0.0172414
70	-0.0200401	-0.004329	0.00613497	-0.00558659	-0.0094518
71	-0.0180361	0.00434783	-0.010142	-0.0148148	0.00954198
72	0.0224949	0.0219298	0.0164271	-0.00186567	0.00954198
73	0.0183673	0.00217391	-0.0201613	0.0131579	-0.00568182
74	0.0040568	0.0219298	0.00613497	-0.012987	0.00761905
75	0.00608519	0	0.0268595	0.0245747	0.0172414
76	-0.00604839	-0.0021692	0.0164271	-0.00186567	0.00571429
77	-0.00604839	0.0087146	0.00817996	-0.00929368	0.00190114
78	0.0142566	-0.0172043	0.00817996	-0.0148148	0.00571429
79	-0.0100604	-0.004329	0.0247423	-0.0239852	0.0172414
80	0.0142566	-0.012931	0.0102459	0.0131579	0.00954198
81	0.0101626	-0.0107991	0.0164271	-0.0203327	-0.00189753
82	0.00202429	0.00653595	0.0122951	0.0361217	0.0211132
83	-0.0180361	0.00217391	0.0102459	0.0131579	0.0211132
84	0.00202429	-0.0107991	0.0247423	-0.00929368	-0.0094518
85	0	-0.0107991	0.0102459	0.00938086	-0.0094518
86	0.00202429	0.0219298	-0.0221774	-0.00372439	0.0172414
87	0.0101626	-0.0150862	-0.00811359	0.00938086	-0.0132075
88	-0.0140562	-0.00863931	-0.0121457	0.0131579	-0.0206767
89	0.00202429	-0.0214592	0.00408163	-0.0184843	-0.0094518
90	-0.0180361	-0.0382979	-0.00811359	-0.00558659	0.0172414
91	0.00608519	0.010917	-0.00811359	0.00561798	-0.00189753
92	0.0040568	0.00653595	-0.00406504	0.00373832	0.00571429
93	0.0224949	0.0376106	-0.0340681	-0.00186567	-0.0132075
94	0.00608519	-0.012931	0.00817996	-0.00186567	-0.0094518
95	-0.0040404	0.00217391	0.0164271	0.00938086	0.00571429
96	0.00813008	0.010917	-0.0161616	-0.00186567	0.00571429
97	-0.0020202	-0.0172043	-0.00609756	0.0226415	0.00571429
98	0.00813008	0.0087146	0	0.0150376	-0.00568182
99	0.00608519	-0.0299145	0.0122951	-0.00186567	-0.0094518
100	0.0183673	-0.0320513	0.00817996	-0.00929368	-0.00568182
101	-0.0020202	0.0131004	-0.00406504	0.00561798	0.00954198
102	0	-0.0236052	0.0143737	-0.0203327	-0.00189753
103	0.00202429	0.0512249	0.00408163	0.00561798	-0.00568182
104	0.00608519	-0.00649351	0.0143737	-0.00558659	-0.0094518
105	0.0142566	0.0175055	0	-0.00372439	0.0133843
106	0.00202429	-0.0299145	0.0164271	-0.0330275	0.00954198
107	-0.00604839	0.0087146	0.0143737	0.0207547	-0.00189753
108	0.00813008	0.0219298	-0.0121457	-0.0166667	0.0172414
109	0.00608519	0.0353201	0.0205761	-0.0203327	0.0211132
110	0.01222	-0.0193548	0	0	0.00190114
111	0.0101626	-0.0278373	-0.00811359	0.0150376	0.0172414
112	-0.0040404	-0.0256959	-0.01417	0.00938086	-0.0169492
113	0.00202429	0.0175055	0	-0.00929368	-0.00568182
114	-0.022	0.0263736	-0.00609756	0.0131579	0.00571429
115	0.0101626	0.0175055	0.0331263	0	0.00190114
116	-0.0140562	0.0153173	0.00817996	-0.00743494	0.00954198
117	0.0142566	-0.00863931	-0.010142	-0.00929368	0.00571429
118	0.00202429	0.0153173	0.00817996	0.0188324	0.0172414
119	0.0183673	-0.0172043	0	-0.00186567	0.00571429
120	-0.0020202	-0.0021692	-0.0241449	-0.00186567	-0.00568182
121	0.00202429	-0.0021692	0	-0.0184843	0.0133843
122	0.0142566	-0.0404255	-0.00811359	0.00373832	0.00190114
123	-0.0100604	0.00217391	0.00817996	0.0169492	-0.0132075
124	0.00202429	-0.00649351	-0.00203666	-0.00186567	0.0133843
125	0.0204499	-0.00863931	-0.00811359	0.0169492	-0.00189753
126	0.00202429	0.0353201	0.0331263	-0.0111317	0
127	-0.0180361	-0.0107991	-0.0201613	0.00186916	0.00571429
128	-0.0020202	-0.0214592	0.00408163	0.00186916	-0.00189753
129	-0.0120724	-0.0107991	0	-0.03125	-0.0132075
130	0.0183673	0.0087146	0.0458333	-0.00743494	0.00954198
131	0.0101626	0	0.00613497	0.00561798	-0.0206767
132	-0.0100604	-0.012931	0.00408163	-0.0203327	0.00190114
133	0	-0.012931	0.00613497	0.00186916	0.00571429
134	-0.00604839	-0.0172043	-0.0281124	0.030303	0.00954198
135	0.0142566	-0.0107991	-0.0241449	-0.0166667	-0.0206767
136	0.00608519	0.0331126	0.00408163	-0.0330275	-0.00568182
137	0.01222	0.00653595	-0.0161616	-0.00743494	0.00571429
138	-0.0120724	0.0219298	0	-0.0184843	-0.0094518
139	0.0183673	0.00653595	0.0122951	0.0169492	-0.0169492
140	-0.0100604	0.0087146	0	0.00938086	0.00190114
141	0.00202429	-0.00649351	-0.00811359	-0.00929368	-0.00378788
142	-0.00604839	-0.0256959	-0.00811359	0.0322581	0.00190114
143	-0.0040404	0.00653595	-0.00406504	0.0284091	-0.0206767
144	-0.0100604	0.0153173	0.00204082	-0.00558659	0.00954198
145	0.0371134	0.00434783	0.0205761	-0.00743494	-0.0094518
146	0.0040568	0.010917	-0.0201613	-0.0166667	0.00954198
147	0.00202429	-0.0214592	-0.0261569	0.00186916	-0.00568182
148	0.00202429	-0.00649351	0.00613497	-0.0239852	-0.00189753
149	0	0.00653595	0.0102459	0.00186916	0.00954198
150	0	-0.0172043	-0.0121457	0.011257	0.00954198
151	0.00608519	-0.0021692	-0.0121457	0.0207547	0.0289017
152	-0.0140562	-0.0382979	0.0205761	0.00938086	0.00954198
153	-0.0100604	0	0.0247423	0.00561798	-0.0132075
154	0.01222	0.0421286	0.0247423	0.00561798	-0.00189753
155	0.00202429	-0.0256959	0.0247423	-0.00929368	-0.00189753
156	-0.0140562	0.0421286	0.00613497	0.0131579	-0.0169492
157	0.0101626	0.00217391	0.0143737	0.00938086	-0.00568182
158	0.0101626	-0.0299145	0.0373444	-0.0330275	0.00954198
159	0.0040568	-0.00649351	0.0310559	-0.00558659	-0.00568182
160	-0.00604839	-0.00863931	-0.01417	0.00938086	-0.00568182
161	0.00608519	0.010917	0.0205761	-0.00558659	-0.00189753
162	0	-0.0320513	-0.0161616	-0.00558659	0.00954198
163	0.0101626	0.030837	0.00613497	-0.0203327	-0.00568182
164	-0.0140562	0.0087146	-0.0181818	-0.00186567	0.0211132
165	0.0183673	0.00434783	0.0310559	0.00749064	0.00571429
166	-0.0100604	0.0219298	0.00817996	0.0188324	0.00190114
167	-0.00604839	-0.012931	0.00817996	-0.0239852	-0.00189753
168	-0.0020202	0.0197368	0	0.00186916	-0.00189753
169	0.0040568	0.0175055	-0.010142	0.0438931	0.00954198
170	-0.0120724	-0.0107991	0	0.00938086	0.0211132
171	0.0142566	-0.0299145	-0.00609756	0.0131579	0.00571429
172	0.0224949	0	0.0205761	-0.0111317	-0.00568182
173	-0.0020202	-0.0150862	0.00817996	-0.0166667	0.00190114
174	0.0183673	0.00434783	0.04158	0.0207547	0.00954198
175	-0.0120724	-0.0150862	0.0164271	0.00938086	-0.00568182
176	0.00202429	-0.012931	0.00613497	-0.00743494	-0.0094518
177	-0.00806452	0.0131004	-0.00811359	0.0207547	0.0133843
178	0	-0.0107991	0.00613497	-0.00558659	0.00571429
179	-0.0020202	0.00653595	-0.0241449	0.0169492	0.00190114
180	-0.0337972	0.0131004	0.0247423	-0.0203327	-0.00189753
181	-0.0040404	-0.00649351	-0.0201613	-0.00558659	0.00190114
182	0.0224949	0.0131004	0.00817996	-0.00186567	0.00190114
183	0.0163265	0	-0.00609756	-0.0203327	-0.00189753
184	-0.0040404	0	0.0185185	0.0131579	-0.00189753
185	0	-0.0320513	-0.0161616	-0.0330275	-0.0094518
186	-0.0120724	0.0175055	0.00204082	-0.0148148	0.00190114
187	-0.0180361	-0.0021692	0.0205761	-0.0221402	-0.00568182
188	-0.0040404	-0.0299145	0.0102459	-0.0239852	-0.00568182
189	-0.00604839	0.0131004	0.0247423	0.0131579	-0.0169492
190	-0.0140562	0.0087146	-0.010142	0.00373832	0.00571429
191	-0.0160643	0	0.00204082	0.0131579	-0.0094518
192	0.00202429	0.00434783	-0.0281124	-0.00186567	-0.00189753
193	0.0224949	-0.0256959	-0.00811359	-0.00929368	-0.00189753
194	-0.00604839	0.0466667	0.00408163	-0.00186567	-0.00189753
195	0.0101626	0	0.0205761	0.0131579	-0.0132075
196	0.0040568	-0.0172043	0.0122951	0.030303	-0.00568182
197	-0.0120724	0.030837	0.0164271	0.00561798	0.0289017
198	0.0101626	-0.0214592	-0.0320641	0.0188324	-0.00189753
199	-0.0180361	0.0131004	0.0268595	0.0131579	-0.00568182
200	-0.0040404	-0.0021692	0.0205761	-0.00743494	0.00954198
201	-0.0120724	0.030837	-0.0161616	-0.00558659	0.00190114
202	0.00608519	-0.0299145	0.00408163	-0.012987	0.00190114
203	0.0101626	0.010917	0.00408163	-0.00186567	0.00190114
204	-0.00604839	0.0197368	0.0102459	-0.0203327	-0.0206767
205	0.00608519	0.0153173	-0.00203666	0.0131579	0.0133843
206	0	0.010917	-0.0340681	-0.00929368	0.00954198
207	-0.0160643	0.0241758	0.0102459	-0.00929368	-0.00568182
208	0	0.0219298	-0.00811359	-0.00558659	-0.0094518
209	-0.0180361	0.0175055	0.0164271	-0.00372439	0.00954198
210	-0.0100604	-0.004329	0.0247423	0.00186916	-0.00189753
211	0.00202429	-0.012931	-0.00406504	0.0245747	-0.0094518
212	0.0224949	0.0175055	0.0122951	-0.00929368	-0.0132075
213	0.0163265	0.010917	0.0164271	0.00373832	0.00571429
214	0.00202429	0.0175055	-0.00203666	0	0.0133843
215	-0.0140562	-0.0236052	-0.00406504	0.00938086	-0.0094518
216	0.0245902	0.0131004	-0.0161616	0.0131579	0.00954198
217	-0.0040404	-0.0150862	-0.00609756	-0.00929368	-0.00568182
218	-0.00604839	-0.0172043	0.0164271	-0.0166667	-0.00568182
219	-0.0100604	0.00217391	0.00817996	0.0226415	0.00190114
220	-0.0040404	0.0580357	0	0.0131579	0.0133843
221	-0.0020202	0.0488889	-0.0201613	-0.00558659	-0.0094518
222	0.0040568	0.010917	-0.00203666	0.0169492	-0.0169492
223	0.01222	-0.0172043	0.00613497	0.0284091	-0.00189753
224	-0.0020202	-0.0214592	0.0185185	0.0169492	0.00954198
225	-0.0140562	0.00653595	0.0164271	-0.00743494	-0.00568182
226	-0.022	-0.0278373	-0.01417	-0.012987	-0.0094518
227	-0.00604839	0.0263736	-0.0320641	0.0284091	-0.00189753
228	0.01222	-0.0278373	0.00408163	0.0131579	0.00571429
229	-0.0040404	0.039823	-0.00811359	-0.012987	0.00954198
230	0	0.0197368	-0.0221774	0.011257	-0.00189753
231	0.0101626	0.00434783	-0.01417	-0.0239852	0.00571429
232	0.00202429	0	-0.01417	-0.00372439	0.00190114
233	0.0183673	-0.00863931	-0.0161616	0.00373832	0.00954198
234	-0.0120724	-0.0021692	0.0185185	0.0169492	-0.00568182
235	0.01222	0.010917	-0.0161616	-0.00186567	0.0211132
236	-0.0140562	0.0197368	0.00408163	-0.0348624	-0.0169492
237	0.0142566	0.0175055	-0.00406504	-0.0473588	-0.0132075
238	-0.0140562	0.0087146	0.0352697	-0.0111317	0.00190114
239	0.00608519	0.0131004	0.0164271	-0.0148148	-0.0094518
240	0.0040568	-0.0150862	-0.010142	-0.00186567	0.00571429
241	0.00608519	-0.00649351	-0.0281124	0.0341556	-0.0169492
242	0.00813008	0.0197368	-0.010142	0.00186916	-0.0132075
243	0.0287474	0	0.0102459	0.0131579	0.0133843
244	0.00608519	0.010917	0.0122951	0.0284091	-0.0094518
245	-0.0040404	0.0087146	-0.0181818	0.011257	0.0211132
246	0.00608519	-0.012931	0	0.0188324	0.0172414
247	-0.0160643	-0.004329	-0.0121457	-0.00929368	0.00954198
248	-0.0180361	0.010917	-0.01417	-0.0239852	-0.00189753
249	0	0.00653595	0.00408163	0.0207547	0.025
250	-0.022	0.0219298	0.00204082	0.0284091	-0.00189753
251	-0.0100604	0.00434783	-0.00609756	-0.0203327	0.0172414
252	0.0040568	0.00217391	0.0164271	-0.012987	0.00571429
253	0.0224949	0	-0.0340681	0.026465	-0.0094518
254	-0.0140562	0	0.0247423	0.0131579	-0.00189753
255	-0.00806452	0	0.0102459	0.0150376	-0.0132075
256	0.0266393	0	0.0102459	-0.00186567	-0.0169492
257	0.0163265	0.00653595	0.00204082	0.0458015	0.00190114
258	-0.0180361	0.0443459	0.0331263	0.00373832	0.00571429
259	0.0101626	0.0131004	-0.010142	0.00561798	-0.00189753
260	0.00608519	0.0087146	-0.00811359	-0.0148148	-0.0132075
261	-0.0140562	-0.0021692	-0.0181818	-0.00929368	-0.0094518
262	-0.0020202	-0.0021692	0.00817996	0.00561798	0.00571429
263	0.00202429	0.0558036	-0.00406504	0.00561798	-0.0094518
264	-0.00604839	0.00217391	-0.0181818	0.0284091	0.00954198
265	0	-0.0214592	-0.0181818	0.0438931	-0.00378788
266	0.00813008	0.0241758	0.0143737	0.00561798	-0.0132075
267	-0.022	0	0.0143737	0.00561798	-0.0169492
268	0.00608519	0.00434783	0.0331263	-0.00929368	0.0133843
269	-0.0140562	0.0153173	-0.00811359	0.0245747	0.00571429
270	0.00813008	0.0153173	0	-0.00372439	0.0172414
271	0.0040568	-0.012931	-0.0121457	-0.0148148	0.00571429
272	-0.0160643	-0.0107991	-0.00811359	-0.00743494	0.0133843
273	0.00202429	-0.00863931	0.0352697	-0.0384615	0.0172414
274	0.00608519	0.00653595	-0.0281124	0.011257	0.00954198
275	0.0183673	0.0131004	0	0	0.00190114
276	-0.0160643	0.0153173	0	0.0207547	-0.00568182
277	0.0183673	0.0219298	0.0247423	0.0322581	0.00571429
278	-0.00806452	0.0263736	0	-0.00186567	-0.00568182
279	0.00813008	-0.0320513	0.0102459	0.00749064	0.00571429
280	-0.00604839	-0.012931	0.0164271	0.0150376	0.00954198
281	0.00813008	-0.0404255	-0.010142	0.00561798	-0.00568182
282	0.0266393	0.0219298	-0.0161616	-0.0166667	0.0172414
283	-0.0259481	0.0175055	-0.0181818	0.0245747	0.00571429
284	-0.00806452	-0.0193548	0.00408163	-0.00372439	-0.00189753
285	-0.00806452	-0.0021692	0.0164271	0.030303	0.00190114
286	0.0142566	-0.0299145	-0.00203666	-0.0166667	0.00571429
287	0.0224949	-0.0278373	-0.00609756	-0.0348624	-0.00189753
288	-0.0140562	-0.0193548	-0.0261569	-0.00558659	-0.0094518
289	0.00813008	-0.00649351	0.0205761	-0.00743494	-0.00568182
290	0.00202429	0.0087146	-0.00406504	-0.00558659	0.00380228
291	0.00608519	0.0241758	-0.0161616	-0.0166667	0.00571429
292	-0.0140562	0.0353201	0.0185185	0.0284091	0.0211132
293	0.0183673	-0.0107991	-0.00609756	0.0169492	-0.00189753
294	0.0204499	0.0131004	-0.0161616	-0.012987	-0.0094518
295	0.0163265	-0.0150862	-0.010142	0.00186916	-0.0132075
296	-0.0100604	0.0286344	-0.0201613	0.00186916	0.0211132
297	0	0.00434783	0.0164271	0.0207547	-0.00189753
298	-0.0020202	0.0331126	-0.00609756	0.0245747	0.00571429
299	-0.0100604	-0.004329	-0.00203666	-0.0203327	0.00190114
300	0.00202429	0.0153173	0.00817996	-0.00929368	-0.0132075
301	-0.0180361	-0.00863931	0	0.00186916	0.00190114
302	-0.0140562	-0.0172043	-0.00203666	-0.00558659	0.00190114
303	0.00202429	-0.012931	0.00408163	0.00938086	-0.0094518
304	0.0101626	0.0087146	-0.0121457	-0.00372439	0.00190114
305	-0.0100604	0.0087146	-0.0201613	-0.0184843	0.00571429
306	0.0101626	0.0263736	0.0247423	-0.00372439	0.00190114
307	0.00202429	-0.012931	-0.00609756	-0.00929368	-0.0094518
308	-0.0020202	-0.00649351	-0.00203666	-0.0239852	-0.00189753
309	0.00202429	-0.00863931	0.0102459	0	0.0172414
310	0	-0.00863931	-0.0161616	-0.00743494	0.00190114
311	-0.0120724	0.00653595	-0.00811359	0.0226415	-0.00189753
312	-0.0120724	-0.0021692	-0.0201613	-0.0456204	-0.00568182
313	-0.0140562	-0.004329	0.0122951	-0.0348624	0.00571429
314	-0.0180361	0.00217391	-0.010142	-0.012987	0.00190114
315	-0.00604839	0.00653595	0	0.00938086	-0.0094518
316	-0.0120724	0.0131004	0.0268595	0.00561798	0.00571429
317	-0.00806452	0.0087146	-0.010142	-0.0203327	-0.00189753
318	0.0224949	-0.0256959	0.0122951	0.00561798	0.0211132
319	-0.0100604	-0.0193548	-0.00609756	0.0131579	-0.0132075
320	-0.022	-0.00863931	0.0164271	0.00938086	0.00571429
321	-0.0020202	-0.0193548	0.00817996	-0.00929368	-0.00189753
322	-0.0100604	0.0131004	0.00408163	0	-0.00189753
323	0.0183673	0.00653595	-0.0320641	0.0322581	0.00190114
324	0.0163265	-0.0299145	0.0164271	0.0361217	0.00571429
325	0.00202429	0.0087146	0.0102459	0.00373832	0.0133843
326	0.01222	-0.00649351	0.0185185	0.0188324	0.00571429
327	-0.0100604	0.00434783	0.00817996	0.00561798	0.00571429
328	-0.00604839	-0.0256959	0.00204082	0.00186916	0.00571429
329	0.0183673	-0.0021692	0	0.0150376	0.00190114
330	-0.0140562	-0.00863931	-0.0241449	0.0131579	0.00190114
331	-0.0020202	-0.0214592	0.0185185	-0.00558659	-0.0094518
332	0.0204499	-0.0299145	-0.010142	0.0284091	-0.0094518
333	0.0101626	0.0286344	0.00613497	0.0150376	0.00190114
334	-0.00604839	0.0131004	0.0164271	-0.0276243	-0.00568182
335	0.00608519	-0.004329	-0.0121457	-0.00929368	0.00571429
336	0.0308008	-0.0021692	0.0205761	0.0341556	0.0133843
337	0.00608519	-0.0107991	-0.00406504	0.0150376	-0.00189753
338	0.0433884	-0.0150862	-0.0121457	-0.00186567	-0.00568182
339	0.0101626	0.00434783	0.00817996	0.00186916	0.00571429
340	0.00608519	-0.0299145	-0.010142	-0.012987	-0.00568182
341	-0.0100604	-0.0214592	-0.00406504	0.011257	-0.00568182
342	0.01222	-0.004329	0.00817996	-0.00186567	0.0133843
343	0.0142566	-0.00649351	0	-0.00743494	0.00190114
344	0.0142566	-0.0172043	-0.00811359	-0.00186567	-0.00189753
345	0.0142566	-0.004329	-0.0121457	0.0169492	-0.0132075
346	0.0142566	0.0131004	0.0247423	0	-0.0132075
347	0.00608519	0.00434783	0.00204082	0.0150376	-0.0094518
348	-0.0120724	0.0153173	-0.01417	-0.0203327	-0.0132075
349	-0.0140562	-0.00649351	-0.038	-0.03125	0.00954198
350	-0.0020202	-0.0021692	-0.00811359	0.0169492	0.00190114
351	-0.0020202	0.00434783	0.0143737	-0.012987	0.00190114
352	0.0142566	-0.0341151	-0.010142	0.0207547	-0.00189753
353	-0.0020202	0.00653595	-0.00811359	-0.0148148	0.00571429
354	0.0040568	-0.012931	0.0331263	-0.00558659	0.00954198
355	0.0101626	0.0087146	0.00408163	0.00749064	-0.0132075
356	-0.0020202	-0.0172043	0.0102459	-0.00929368	-0.00568182
357	0	0	-0.0201613	0.00938086	-0.00189753
358	0.00202429	0.0153173	0.0205761	-0.0330275	0.0172414
359	-0.0020202	-0.0278373	-0.00406504	0.00938086	-0.0243902
360	0	-0.00863931	0	0.026465	0.00571429
361	0.00608519	0	-0.01417	0.00186916	-0.0132075
362	0.0040568	-0.0172043	-0.0161616	-0.00558659	0.00190114
363	0.00202429	0.0087146	0	-0.00186567	0
364	0.00608519	-0.0172043	0	-0.0221402	0.0211132
365	-0.0120724	-0.004329	0.0122951	0.00186916	0.00954198
366	-0.0020202	0.0131004	-0.0161616	-0.00929368	0.00190114
367	0.00202429	0.0175055	0.00817996	-0.00186567	0.00190114
368	0.0040568	0.039823	0.0143737	0.026465	-0.0094518
369	0.0287474	-0.004329	0.0352697	-0.0166667	0.00571429
370	-0.0298805	0.0219298	0.00817996	-0.03125	-0.0169492
371	0.00202429	-0.0021692	-0.0121457	0.00561798	0.00954198
372	0.00813008	0	0.0164271	-0.0221402	0.00190114
373	0.0040568	-0.0299145	0.0122951	-0.0384615	0.00190114
374	-0.00604839	0.0219298	0.0143737	0.00749064	-0.0132075
375	-0.0100604	-0.012931	0.0122951	-0.00558659	0.00954198
376	-0.0180361	0.0331126	0.00204082	0.0245747	0.00954198
377	-0.0160643	0.00653595	0	-0.00929368	0.0211132
378	-0.00604839	-0.0150862	0.0185185	0.0169492	-0.00568182
379	0.00202429	-0.0107991	-0.0121457	-0.0276243	0.0133843
380	0.00813008	0.0263736	-0.0241449	0.00186916	0.00954198
381	-0.00806452	0.00434783	0.0185185	-0.00558659	-0.00189753
382	0.00202429	-0.0341151	-0.00406504	-0.0166667	0.00190114
383	0.0224949	0.0219298	0.0205761	-0.00372439	-0.00189753
384	-0.0120724	-0.0299145	0.00204082	-0.0166667	-0.00568182
385	-0.0100604	0.0331126	-0.0281124	-0.0166667	0.00571429
386	0.0142566	-0.004329	-0.010142	0.00373832	0.00571429
387	-0.0160643	0.0131004	0.0122951	-0.0276243	0.0172414
388	-0.00604839	-0.00649351	-0.01417	0	0.00190114
389	-0.0020202	-0.0021692	0	-0.0166667	-0.0113208
390	0.00608519	-0.0021692	-0.01417	-0.0203327	0.00954198
391	-0.0160643	0.00217391	-0.0181818	0.0284091	-0.00189753
392	0	0.010917	0	-0.00186567	-0.0094518
393	0.00608519	0.0353201	-0.0181818	-0.00929368	0.00954198
394	-0.00604839	0.0087146	-0.0181818	0.0131579	0.00571429
395	0.00202429	-0.004329	0.0102459	-0.00929368	-0.00568182
396	-0.0020202	-0.004329	-0.0201613	0.0131579	-0.0169492
397	0.0163265	0.00434783	0.0205761	0.00373832	-0.0094518
398	-0.0140562	0.00653595	-0.0121457	-0.00743494	0.00190114
399	0.00202429	0.0131004	0.0268595	0.00186916	0.00571429
400	-0.0020202	0.0175055	0	0.00938086	0.00190114
401	-0.0020202	-0.00863931	0	0.0207547	0.00954198
402	-0.00604839	0.0512249	0.0268595	-0.00929368	-0.00189753
403	-0.0040404	0	0.00408163	0.0284091	0.00190114
404	-0.0100604	0.0175055	-0.0121457	0.00561798	-0.00189753
405	-0.0020202	-0.004329	0.0102459	-0.0166667	0.0211132
406	0.00202429	0.0087146	-0.00203666	0.00186916	0.0114504
407	0.00202429	0.00217391	-0.010142	-0.00186567	0.0133843
408	-0.0020202	0.0197368	-0.01417	0.0169492	0.00190114
409	0.00608519	-0.004329	-0.0181818	-0.012987	0.00571429
410	-0.00806452	-0.0172043	-0.00811359	0.00186916	-0.0094518
411	0.0101626	0	-0.00406504	0.00561798	0.00571429
412	-0.022	-0.0021692	-0.00811359	0.00186916	-0.0132075
413	0.0101626	0.0131004	0.0226804	0.0322581	-0.0094518
414	0.0142566	-0.0236052	-0.0181818	-0.0203327	0.00190114
415	0.00202429	0.0153173	0.00408163	0.026465	-0.00568182
416	-0.0040404	0.0286344	0.00204082	-0.0148148	-0.0132075
417	-0.0160643	-0.00649351	0.0310559	0.00561798	0.00571429
418	-0.00604839	-0.0362473	-0.00609756	0.0284091	0.00190114
419	-0.0020202	0.0131004	-0.0121457	0.00561798	0.00190114
420	0.0329218	-0.004329	0.00613497	0.0169492	0.0133843
421	-0.0100604	-0.0150862	-0.00609756	-0.012987	0.00571429
422	0.0183673	-0.0150862	-0.00203666	-0.0276243	0.00190114
423	0.00813008	-0.00649351	-0.010142	0.0169492	0.00954198
424	-0.0040404	0.0087146	0.0205761	-0.0257827	0.00954198
425	0.00608519	-0.012931	0.0102459	-0.00929368	0.00954198
426	0.00608519	-0.0021692	0.0143737	0.00373832	-0.0243902
427	0.00202429	0.00434783	-0.010142	0.0438931	-0.0243902
428	-0.00604839	0.0153173	0.00408163	0	0.0172414
429	0.01222	-0.0150862	0.00817996	-0.00558659	-0.0169492
430	0.00202429	-0.0021692	-0.010142	0.0207547	-0.00189753
431	-0.0140562	-0.012931	0.0122951	-0.00372439	0.00190114
432	-0.0100604	-0.0487288	-0.00609756	-0.0402194	0.00954198
433	0.0101626	-0.012931	0.00613497	0.00938086	0.0172414
434	0.0349794	0.0263736	0.0185185	-0.0239852	-0.00189753
435	0.00608519	-0.0341151	0.00613497	-0.00929368	0.00571429
436	0.00608519	-0.004329	0.00204082	0.0226415	0.00954198
437	-0.0140562	-0.0214592	0.0164271	0	-0.0132075
438	0.00608519	0.0241758	-0.0121457	-0.00558659	0.00190114
439	0.0040568	0.0131004	-0.0281124	-0.0184843	0.00954198
440	0.0308008	0.00217391	-0.0261569	0.0207547	0.00190114
441	-0.0100604	-0.00863931	-0.00811359	-0.00929368	0.00761905
442	-0.00604839	0.00434783	0	0.00749064	-0.00568182
443	0.0142566	-0.0278373	0.0185185	0.00938086	0.00571429
444	-0.0140562	-0.0193548	-0.0261569	0.0131579	-0.0094518
445	0.00608519	0.0153173	-0.0161616	-0.012987	0.00571429
446	-0.0020202	-0.012931	0.00817996	0.00561798	-0.0094518
447	0.01222	-0.0107991	0.0226804	0.0131579	0.00954198
448	-0.0180361	-0.0236052	-0.036	-0.00929368	-0.00189753
449	-0.0120724	0.0263736	0.0164271	-0.00929368	-0.0094518
450	0.01222	0.0534521	0.0205761	-0.0221402	-0.00189753
451	0.00202429	-0.012931	0.00613497	0.0361217	-0.00189753
452	-0.0120724	-0.0172043	0.00817996	0.00561798	0.00190114
453	0.0163265	0.00434783	0.00408163	0.0169492	0.00954198
454	0.0101626	0.0241758	0.04375	0.011257	-0.0132075
455	-0.0140562	-0.0193548	0.0185185	-0.0166667	0.0133843
456	-0.0100604	-0.0150862	-0.00811359	0.0245747	-0.0094518
457	0.00608519	-0.012931	-0.0121457	0.00938086	0.0133843
458	-0.0100604	0.0175055	0.0205761	-0.012987	0.00954198
459	-0.0020202	0.00434783	-0.00203666	0.00186916	0.00571429
460	0.00608519	0.00653595	-0.0281124	-0.0203327	-0.00568182
461	-0.0020202	0.00434783	-0.0121457	-0.0276243	0.00954198
462	-0.0100604	-0.0466102	-0.00811359	0.00186916	-0.0206767
463	-0.0020202	0.0175055	0.00613497	-0.03125	-0.0206767
464	0.00608519	-0.00863931	0.0310559	-0.0257827	-0.00189753
465	-0.0040404	0.0087146	0	0.00938086	-0.00189753
466	-0.0100604	-0.0172043	0.00817996	-0.00372439	-0.0150659
467	0.00608519	-0.0150862	-0.00811359	-0.0166667	0.0172414
468	-0.00604839	0.0131004	-0.00203666	0.0419048	-0.00189753
469	0.0224949	-0.0193548	0.0268595	0.011257	-0.00189753
470	0.0142566	-0.0214592	0.00817996	0.00561798	-0.00189753
471	-0.0100604	0.00217391	0.0164271	0.00186916	-0.0094518
472	-0.0020202	0.00217391	0	0.0245747	0.00380228
473	0.0040568	-0.004329	0.0102459	0.00186916	-0.00568182
474	0.00202429	0.010917	0	0.00186916	-0.0132075
475	-0.0160643	-0.0021692	0.0226804	0.0207547	-0.00189753
476	-0.0140562	-0.0236052	-0.00609756	-0.00186567	0.00190114
477	0.0040568	-0.0107991	-0.00406504	-0.00186567	-0.0206767
478	0.00202429	-0.00649351	0.00204082	-0.0276243	-0.00568182
479	0.0040568	-0.0214592	0.00817996	0.00186916	-0.00568182
480	0.0142566	-0.00863931	0	0.00938086	-0.0094518
481	-0.0020202	0.00217391	-0.00203666	0.00373832	-0.00189753
482	0.0101626	-0.0299145	-0.0121457	-0.00743494	-0.0132075
483	-0.0200401	-0.012931	-0.00609756	0.0419048	0.00571429
484	0.00608519	-0.0193548	-0.01417	0.0150376	-0.0169492
485	-0.0140562	-0.012931	-0.00406504	-0.00929368	-0.00189753
486	-0.0020202	-0.004329	0	0	-0.0132075
487	-0.0160643	-0.0107991	0.0122951	-0.00929368	-0.0132075
488	0.0183673	0.0376106	-0.00609756	0.0284091	0.00190114
489	0.0142566	-0.00863931	0	0.00186916	-0.00568182
490	-0.0120724	-0.0193548	-0.0201613	0.00561798	0.00190114
491	0.0349794	0.0197368	0.00817996	-0.00929368	-0.00568182
492	0.00202429	0.0175055	0.00817996	-0.00372439	-0.0132075
493	0.00813008	-0.00649351	-0.0201613	0.00186916	-0.0094518
494	0.0142566	-0.00863931	-0.0241449	-0.0203327	0.00571429
495	0.0142566	0.0087146	-0.00203666	-0.00186567	0.00954198
496	-0.0140562	0.00434783	0.00408163	0.00373832	-0.0094518
497	-0.0259481	0.00217391	0.0164271	0.011257	0.00954198
498	0.0183673	-0.004329	0.0458333	0.00938086	-0.00189753
499	0.0183673	0.00434783	-0.0320641	0.0207547	0.00571429
500	-0.0100604	-0.00863931	0.0102459	-0.0203327	-0.00189753
501	0.00202429	0.0175055	-0.00811359	-0.00186567	0.0133843
502	0	0.030837	0.00408163	0.00938086	0.00571429
503	0.00813008	0.00434783	-0.0121457	0.00938086	0.00954198
504	0.0101626	0.0131004	-0.00811359	-0.0184843	0.00190114
505	0.00608519	0.0153173	-0.0161616	-0.00558659	-0.0132075
506	0.00202429	-0.00863931	-0.00203666	-0.0111317	0.00571429
507	-0.0020202	-0.0150862	-0.00609756	-0.0294118	-0.0094518
508	0.0183673	-0.004329	-0.01417	-0.0148148	0.00954198
509	-0.0020202	0.010917	-0.00203666	0.0150376	0.00190114
510	0.0204499	0.039823	0.00817996	0.00938086	-0.00568182
511	-0.022	0.039823	0	0.0169492	0.0172414
512	0.0101626	-0.0362473	-0.0161616	0.00373832	-0.00568182
513	0.01222	-0.0256959	0.00408163	-0.00372439	-0.0132075
514	-0.0040404	0	-0.00811359	0.00373832	-0.00189753
515	0.0183673	0.0219298	0.0143737	-0.00186567	0.00954198
516	-0.0180361	0.0466667	0.0122951	0.011257	0.0172414
517	0.00813008	0.00653595	0.00817996	0.0131579	0.0133843
518	-0.0020202	0.00217391	0.00613497	-0.00186567	-0.00568182
519	-0.00604839	0.0263736	0.0122951	-0.0203327	0.00571429
520	0.0142566	0.0175055	0.0310559	0.0245747	-0.00568182
521	0.0040568	-0.0299145	-0.00811359	0.0438931	0.0133843
522	0.0183673	0.0376106	-0.0121457	0.00373832	0.0367505
523	0.00608519	0.0131004	0.00817996	0.011257	0.0133843
524	0.00202429	-0.004329	0.0205761	0.00373832	-0.0206767
525	-0.0020202	0.0087146	-0.00811359	0.0245747	0.025
526	-0.0020202	0.0263736	-0.00203666	-0.03125	-0.0094518
527	-0.0140562	0.00434783	-0.01417	-0.00929368	0.00954198
528	0.00202429	-0.00649351	0.00408163	0.0169492	0.0133843
529	0.0204499	0.030837	0.0205761	-0.012987	0.0133843
530	0.0040568	-0.00863931	-0.00406504	0.0226415	0.0172414
531	0.0142566	-0.0341151	-0.00811359	-0.0148148	-0.00189753
532	0.01222	0.0286344	0.00817996	-0.00929368	-0.00756144
533	-0.0020202	-0.004329	-0.00203666	0.0169492	0.00571429
534	-0.0100604	-0.0193548	0.0164271	0.00938086	0.00190114
535	-0.0100604	-0.0021692	0.00408163	0.0341556	-0.00189753
536	0.00608519	-0.0172043	0.00204082	-0.012987	0.00571429
537	-0.0040404	0	0.0102459	-0.0239852	0.00571429
538	0	-0.0341151	-0.0281124	0.0284091	-0.0280899
539	-0.00806452	0.0087146	-0.0221774	-0.00186567	0.00571429
540	-0.0140562	0.0131004	-0.0121457	-0.012987	0.00190114
541	0.00813008	-0.004329	-0.0201613	-0.00929368	-0.00189753
542	-0.0259481	-0.004329	0.00408163	-0.00929368	-0.0169492
543	0.0040568	0.0286344	0.0289256	-0.012987	0.00571429
544	-0.00604839	-0.012931	0.00613497	0.00186916	-0.00189753
545	-0.0200401	-0.004329	-0.01417	-0.0184843	-0.00568182
546	0.00608519	0	-0.00609756	-0.0166667	-0.0132075
547	-0.00604839	-0.00649351	0.00204082	-0.00372439	-0.00568182
548	-0.0140562	0.00434783	-0.0161616	-0.0348624	0.00571429
549	0.00202429	0.0466667	-0.0121457	-0.00372439	0.0172414
550	-0.0100604	-0.0021692	-0.00203666	-0.03125	0.00571429
551	0.00608519	-0.004329	0.00613497	-0.0257827	-0.0094518
552	-0.0020202	0.0131004	-0.0320641	-0.00186567	-0.0094518
553	-0.0140562	-0.0341151	0.00817996	0.00186916	0.0172414
554	0.00608519	-0.00649351	-0.0161616	0.00186916	0.00190114
555	0	0.00434783	-0.0201613	-0.012987	0.00954198
556	0.01222	-0.0172043	0.04158	0.0207547	-0.00189753
557	0.00608519	0.00653595	0.0143737	-0.00186567	0.0133843
558	-0.0100604	0.0131004	0.0331263	0.00186916	0.00954198
559	0	-0.00649351	-0.00203666	-0.00558659	0.0133843
560	0.00202429	-0.0299145	0.0185185	0.00938086	0.00190114
561	-0.0100604	-0.0150862	0.00408163	0.0188324	-0.0094518
562	0.0040568	-0.00863931	-0.00811359	-0.0166667	0.00571429
563	0.0040568	-0.0299145	-0.0281124	0.0169492	0.00571429
564	0.0142566	0.00217391	-0.01417	0.0150376	-0.0094518
565	-0.0100604	0.0219298	0.0289256	-0.00558659	-0.00189753
566	-0.00806452	0.0219298	-0.0221774	-0.0166667	-0.00189753
567	0.00608519	0.030837	0	0.0169492	-0.0132075
568	0.00813008	-0.00649351	-0.0241449	-0.00372439	-0.00189753
569	0.01222	-0.0278373	-0.00811359	-0.00558659	0.00954198
570	-0.0140562	0.00653595	-0.00406504	0.00186916	-0.00189753
571	0.0308008	-0.0021692	-0.00811359	-0.00186567	-0.0132075
572	0	0.00434783	-0.0320641	0.0131579	-0.00189753
573	-0.0180361	0.0131004	0.00204082	-0.012987	0.00190114
574	0.0224949	-0.0278373	-0.0121457	-0.00372439	0.00190114
575	-0.0020202	-0.0299145	0.0102459	0.00186916	-0.00568182
576	0.0266393	0.0175055	0.0289256	0.0169492	0.0133843
577	0.0266393	-0.0021692	-0.0121457	-0.00743494	-0.0094518
578	0.00202429	0.00434783	-0.00609756	0.00561798	-0.00189753
579	0.00202429	-0.004329	0.00817996	0.0131579	-0.00756144
580	-0.00604839	0.0175055	0.0289256	0	-0.00568182
581	-0.0040404	0	-0.00406504	-0.00929368	-0.00568182
582	0.0204499	-0.00863931	-0.010142	0.00186916	-0.0094518
583	-0.00806452	0.039823	-0.00406504	-0.012987	-0.0206767
584	-0.00604839	0.030837	-0.010142	0.00561798	-0.0132075
585	-0.0100604	0.0131004	-0.0181818	-0.0221402	0.00954198
586	0.0183673	-0.0256959	-0.0458167	0.0322581	0.00571429
587	0.00813008	0.039823	-0.00406504	-0.00186567	0.0211132
588	-0.0020202	0.00217391	-0.010142	-0.00558659	0.00190114
589	0	-0.012931	0.0289256	-0.00186567	0.00190114
590	0.00202429	-0.0341151	-0.0241449	0.00938086	0.00954198
591	0.00202429	0.0153173	-0.01417	-0.0184843	0.0133843
592	0.0224949	0	0.00408163	-0.0111317	-0.00189753
593	-0.0120724	0.030837	-0.00406504	0.0284091	-0.0094518
594	-0.00604839	-0.0424628	-0.0161616	0.00561798	-0.0169492
595	-0.0020202	-0.00649351	0.00408163	-0.00186567	-0.0169492
596	-0.0180361	-0.0193548	0.0102459	0.00186916	-0.0094518
597	0.0142566	-0.0172043	0.0185185	0.030303	-0.0132075
598	0.00202429	0.0263736	0	0.00186916	-0.0094518
599	0.0224949	0.00434783	-0.0161616	0.0131579	-0.00568182
600	-0.0020202	0.0197368	0.0122951	0.0284091	-0.00189753
601	-0.00604839	0.010917	0.00408163	-0.00372439	-0.00189753
602	-0.0100604	-0.0341151	0.0247423	0.00373832	0.00380228
603	-0.0337972	0.00434783	0.0143737	-0.00186567	0.00571429
604	-0.0020202	0.00434783	-0.0121457	-0.00929368	0.00954198
605	-0.0140562	0.00434783	-0.0181818	-0.0166667	0.00954198
606	0	0.0175055	0.0205761	0.00186916	0.00571429
607	-0.0120724	0.00653595	0.0164271	-0.00558659	0.00954198
608	-0.0020202	0.0131004	0.0102459	0.0284091	-0.00189753
609	0.0101626	-0.00863931	-0.0121457	0.0188324	0.00190114
610	0.0101626	-0.00863931	0	0.026465	0.00571429
611	-0.00604839	-0.0021692	-0.00811359	0.0207547	0.00954198
612	0.00202429	0.0241758	0.0205761	0.0284091	0.0172414
613	-0.00806452	-0.0021692	0.00204082	0.00186916	0.025
614	0.0101626	-0.004329	-0.0241449	0.00938086	0.00954198
615	-0.0180361	-0.00649351	-0.00406504	-0.012987	0.00190114
616	-0.0100604	0.0219298	0.0247423	0.0150376	0.00190114
617	-0.0020202	-0.0150862	0.0164271	0.00938086	-0.00568182
618	-0.00806452	-0.00649351	0.0185185	0.011257	0.0133843
619	0	0.0131004	-0.0181818	-0.00558659	0.00190114
620	0.00813008	-0.004329	-0.0281124	0.0245747	-0.00189753
621	0.00202429	0.039823	-0.010142	0.026465	-0.00568182
622	0.0040568	-0.00863931	0.0164271	-0.00186567	-0.0094518
623	-0.0020202	-0.0021692	0.0102459	0.00938086	-0.00189753
624	0.0224949	0.0087146	0.00613497	0	0.00190114
625	0.0142566	-0.0021692	-0.0241449	0.00186916	-0.0094518
626	-0.0200401	-0.0107991	0.0122951	-0.012987	0.0133843
627	0.00608519	-0.004329	0.0247423	-0.0184843	-0.0094518
628	-0.0020202	-0.012931	0.0247423	0.0245747	-0.0094518
629	0.0204499	0.00217391	-0.00811359	0.0169492	0.0133843
630	-0.0020202	-0.0021692	0.00817996	0.00561798	-0.0094518
631	-0.00604839	0.0175055	-0.0241449	-0.00186567	0.00954198
632	-0.00806452	0.00653595	0.0331263	0.00938086	0.00571429
633	0.00202429	0.0175055	0.0247423	-0.0203327	-0.0094518
634	0	-0.0193548	-0.0121457	0.0207547	-0.00189753
635	0.0040568	0.0197368	-0.0121457	-0.00929368	-0.00568182
636	0.0040568	-0.0193548	0.0122951	-0.00186567	-0.00189753
637	-0.022	-0.004329	-0.010142	0.00373832	-0.00189753
638	0.00608519	-0.0341151	0.0143737	-0.00929368	0.0211132
639	0.0183673	-0.0214592	-0.010142	0.011257	-0.00568182
640	-0.00604839	-0.0150862	-0.00811359	0.00561798	-0.0132075
641	0.00202429	-0.0278373	-0.00609756	0.00938086	-0.00568182
642	0.0101626	0	0.0122951	0.0169492	-0.0094518
643	0.00608519	-0.0193548	-0.0221774	-0.00186567	-0.0243902
644	-0.0298805	0.0219298	-0.0181818	-0.00929368	-0.00189753
645	0.0101626	0.0421286	-0.010142	-0.012987	0.00190114
646	-0.0160643	-0.00863931	-0.0181818	0.00186916	-0.00378788
647	0.00202429	-0.004329	0.0630252	-0.00186567	-0.0094518
648	0.00813008	-0.0214592	-0.0121457	0.0245747	0.00763359
649	0.0163265	0.0263736	0.00408163	0.0245747	-0.0094518
650	-0.00604839	0.0175055	-0.00811359	-0.00372439	0.0211132
651	-0.00806452	0.0131004	0	0.00373832	-0.00189753
652	-0.022	-0.012931	-0.0201613	-0.00186567	0.00954198
653	-0.0140562	-0.012931	-0.00406504	0.0131579	0.00571429
654	0.0101626	0.0331126	0.00817996	-0.00929368	-0.00189753
655	-0.00604839	-0.0236052	0.00204082	-0.0294118	0.00190114
656	-0.00604839	0.0263736	-0.0281124	0.00186916	0.00190114
657	-0.0020202	-0.0107991	-0.0301205	-0.00186567	-0.00568182
658	0.00202429	0.010917	0.00817996	-0.00558659	0.00571429
659	-0.0100604	0.00217391	-0.0281124	-0.0111317	0.00571429
660	0.01222	-0.00863931	-0.010142	0.00938086	0.00190114
661	0.00608519	0.010917	0.0268595	-0.0166667	-0.00568182
662	0.0142566	0.0131004	-0.00609756	-0.0276243	0.00954198
663	-0.0160643	0.0131004	0.0205761	-0.0203327	-0.0169492
664	0.0101626	0.030837	0.00408163	-0.00558659	-0.0094518
665	-0.022	0.0286344	-0.01417	0.0284091	-0.0094518
666	-0.00604839	-0.004329	0.0122951	0.0169492	-0.0132075
667	-0.0180361	0.00653595	-0.0161616	0.0169492	-0.0206767
668	0.00202429	-0.0299145	0.0185185	0.00561798	0.0172414
669	0.00608519	0.010917	0.00408163	-0.0111317	0.025
670	0.0183673	-0.00649351	-0.010142	-0.00558659	0.00571429
671	-0.0020202	-0.00862069	0	0.0245747	0.00954198
672	-0.0020202	-0.0021692	-0.00811359	0.0131579	0.00190114
673	0.00202429	-0.0256959	-0.00406504	0.00561798	0.025
674	-0.0020202	0.0263736	0.00613497	-0.0239852	0.00954198
675	0.00813008	0.00217391	0.0143737	0.0207547	-0.0169492
676	-0.0140562	-0.00649351	-0.010142	0.0169492	0.00190114
677	0.00202429	0	-0.038	-0.0239852	-0.00568182
678	0.00202429	-0.0214592	-0.0281124	0.00561798	0.0133843
679	0.00202429	0.0241758	0.0352697	-0.00929368	0.0172414
680	-0.0259481	0.0131004	0	-0.00929368	-0.0132075
681	0.0142566	0.00217391	-0.0281124	0.00186916	-0.0169492
682	-0.0040404	0.0219298	0	0.011257	0.0211132
683	-0.00604839	0.039823	0.0226804	-0.00929368	0.0211132
684	-0.022	-0.0021692	-0.038	0.0169492	0.00954198
685	-0.00604839	-0.012931	0.0185185	0.00186916	-0.0132075
686	0.00813008	-0.0341151	0.00817996	0.00373832	0.00190114
687	0.0413223	0.00434783	0.00817996	-0.00186567	0.00190114
688	-0.00604839	0.0466667	-0.0241449	0.0245747	-0.0132075
689	0.00202429	0.0331126	0.0122951	-0.0166667	-0.0094518
690	0.0308008	0.0263736	0	0.00561798	0.00190114
691	0.0183673	0.0153173	0	-0.0276243	-0.00189753
692	0	-0.0021692	0.0122951	0.0322581	0.00571429
693	0.00202429	0.0376106	-0.0161616	-0.0148148	-0.0132075
694	0.00608519	-0.0172043	-0.00406504	-0.00558659	-0.0132075
695	-0.0040404	0	-0.0301205	-0.0384615	-0.00568182
696	0.00202429	0.0087146	0.0289256	0.00186916	-0.0132075
697	-0.00604839	-0.00863931	0.0164271	0.0169492	-0.00568182
698	0.0040568	0.0263736	0.0164271	-0.0239852	-0.00568182
699	0.00202429	0.00434783	0.0143737	0.00373832	-0.0094518
700	-0.0140562	-0.0341151	0.0164271	-0.0203327	-0.00189753
701	0.00202429	0.0175055	-0.00203666	-0.03125	0.00571429
702	-0.0100604	-0.012931	-0.00406504	-0.00558659	-0.0280899
703	-0.0200401	0.030837	0.00408163	0.00561798	-0.00189753
704	-0.022	0	0.0205761	-0.012987	-0.0094518
705	-0.00604839	-0.0382979	-0.01417	0.00186916	-0.00568182
706	0	-0.0172043	-0.00406504	0.0226415	-0.0094518
707	0.0101626	-0.0172043	0.0205761	-0.0166667	0.00190114
708	0.00202429	-0.012931	0	-0.00186567	-0.00189753
709	0.00202429	0.0219298	0.0122951	0.0150376	0.0133843
710	0.0224949	-0.0107991	0.00613497	-0.0203327	0.0289017
711	0.0183673	0	0.00817996	-0.0203327	0.00190114
712	-0.0020202	0.00217391	-0.010142	0	-0.0206767
713	-0.00806452	0.039823	0.0480167	0.011257	0.00571429
714	-0.0100604	0.0131004	0.0310559	-0.0348624	0.00954198
715	0.0101626	-0.00863931	0.00408163	-0.00186567	-0.00568182
716	0.00202429	0.0131004	-0.00609756	0.0188324	0.0133843
717	0.00608519	-0.00863931	-0.00406504	-0.0203327	-0.00189753
718	-0.00806452	-0.004329	0.0185185	0.00186916	-0.00189753
719	0.00608519	0.0286344	0.00817996	0.0131579	-0.00568182
720	-0.0160643	-0.0320513	0.00613497	0.011257	-0.0094518
721	0.00202429	-0.0236052	-0.0161616	0	-0.00189753
722	-0.0180361	-0.00649351	-0.00811359	0.0169492	0.00954198
723	0.0142566	-0.0256959	0.0164271	-0.0148148	0.00190114
724	-0.0120724	-0.012931	-0.0261569	-0.0239852	-0.00568182
725	0.0101626	-0.0278373	-0.01417	0.00561798	-0.00189753
726	0.0183673	-0.0214592	-0.00609756	0.00561798	-0.00189753
727	-0.0120724	0	0.0164271	0.011257	-0.00189753
728	-0.00604839	-0.0299145	0.00817996	0.00373832	0.00571429
729	0.0101626	0.0219298	0.0205761	0.0131579	0.00190114
730	0.01222	0.0175055	-0.0261569	-0.00558659	0.00571429
731	-0.0100604	-0.004329	-0.038	0.0458015	-0.0169492
732	-0.0020202	-0.0107991	-0.00406504	0	0.0289017
733	0.00608519	-0.012931	0.00408163	-0.0276243	-0.0169492
734	-0.0140562	-0.012931	-0.0201613	-0.0203327	-0.00568182
735	0.0142566	-0.00863931	0.0268595	-0.00186567	-0.0280899
736	0.0040568	-0.012931	-0.01417	0.00561798	-0.0132075
737	-0.0180361	0.0131004	-0.00203666	0.0226415	0.00190114
738	0.00608519	-0.0107991	0.00408163	0.0188324	0.00571429
739	0	-0.0341151	-0.0121457	-0.012987	0.0172414
740	-0.024	0.0175055	-0.0121457	-0.0166667	-0.0132075
741	0	0.0263736	-0.00406504	-0.00186567	0.00571429
742	-0.0120724	0.00434783	-0.00203666	0.0207547	0.00954198
743	-0.0160643	0.0241758	-0.0458167	0.0207547	-0.0132075
744	-0.0020202	-0.004329	0.00613497	-0.0111317	-0.0169492
745	0.00608519	-0.00649351	0.00817996	-0.00186567	-0.0132075
746	-0.0180361	0.0219298	0.00817996	0.00561798	0.00571429
747	-0.0200401	0	-0.00609756	-0.0166667	0.00571429
748	0	-0.00649351	0	0.00561798	-0.0206767
749	0.00202429	-0.0214592	0.00408163	-0.00186567	-0.0243902
750	0.00202429	-0.012931	0.0331263	0.00186916	0.00571429
751	0.0101626	0.0197368	0.00613497	-0.00743494	-0.0169492
752	0.0142566	0.0175055	0.0205761	-0.0184843	-0.00189753
753	0.00202429	0.00217391	0.00408163	0.00938086	-0.0094518
754	0.00202429	0.0175055	-0.0181818	0.0207547	0.00190114
755	0.00202429	-0.012931	-0.0201613	-0.00929368	0.0133843
756	0.00608519	-0.0021692	0	-0.00743494	0.00571429
757	-0.022	-0.004329	0.00204082	0.0341556	-0.0169492
758	-0.0020202	0.030837	-0.0121457	0.0131579	-0.00568182
759	-0.00604839	-0.00863931	0.00817996	-0.00372439	-0.0094518
760	0.0101626	0.0153173	-0.0201613	0.0284091	0.00190114
761	0.01222	0.0443459	0.0164271	-0.00186567	0.00190114
762	-0.0100604	0.00653595	0.0122951	-0.0420475	0.00571429
763	0.0224949	-0.0107991	0.0122951	-0.012987	0.00954198
764	0.0204499	-0.0021692	0.00817996	-0.00186567	-0.00189753
765	-0.0020202	0.0175055	0.00204082	-0.00186567	-0.00189753
766	0.0266393	-0.0299145	0.00613497	0.00938086	-0.0243902
767	0.00202429	0.030837	0.00408163	0.00186916	-0.0132075
768	0.0142566	-0.0299145	0.00204082	-0.00558659	0.00190114
769	-0.0040404	-0.012931	0.00613497	0.00186916	0.00571429
770	0.0224949	0.030837	0.0185185	-0.00743494	0.00954198
771	0.00608519	0.010917	-0.0121457	-0.00929368	-0.00189753
772	-0.0200401	-0.012931	-0.00203666	-0.00743494	0.0133843
773	0.00202429	0.0087146	0.0164271	-0.00558659	0.00954198
774	0.0142566	-0.0236052	-0.0161616	0.0169492	-0.00568182
775	-0.0140562	-0.012931	0.0164271	0.00373832	0.00571429
776	-0.0100604	-0.0487288	-0.00609756	-0.00186567	0.00571429
777	-0.0020202	-0.0256959	0	0.0322581	-0.00189753
778	-0.0160643	-0.004329	-0.0241449	-0.0166667	-0.00568182
779	0.00202429	0.00434783	0.0185185	-0.00929368	0.0172414
780	0.00202429	0.00434783	-0.0201613	0.00938086	0.00571429
781	0.0142566	-0.00649351	0.0122951	-0.0203327	-0.0132075
782	-0.0180361	-0.0150862	0.0122951	0.00373832	-0.00568182
783	0.00608519	0	-0.00203666	0.00938086	0.00954198
784	0.00202429	-0.004329	0.00408163	0.0207547	-0.00568182
785	-0.0020202	-0.0172043	0.0164271	-0.00186567	0.00571429
786	0.0224949	-0.0236052	0.00408163	-0.0184843	0.00571429
787	0.0142566	0.00434783	-0.00203666	0.04	-0.00568182
788	0	0	0.00204082	0.00561798	-0.00189753
789	0.0101626	-0.0193548	-0.00406504	0.011257	0.00954198
790	-0.022	0.0131004	-0.0301205	-0.0203327	-0.0132075
791	-0.0040404	-0.00649351	0.0587002	-0.0239852	0.0133843
792	0.00608519	-0.0236052	0.00204082	0.0438931	-0.00568182
793	-0.0100604	0.0286344	-0.00406504	-0.0166667	0.0211132
794	0.0204499	-0.0299145	0.0289256	0.00938086	-0.0094518
795	0.0040568	0.00217391	-0.0161616	0.00938086	-0.0094518
796	-0.00604839	0.00653595	-0.010142	-0.00929368	-0.0206767
797	-0.00604839	0.0376106	0.00408163	0.00938086	-0.0132075
798	-0.0180361	0	-0.00609756	-0.012987	0.00954198
799	-0.022	-0.00863931	-0.0241449	0.00938086	0.00954198
800	0.00202429	-0.00863931	-0.00203666	-0.00558659	-0.0243902
801	0.0040568	0	0.00408163	0.00561798	0.00954198
802	0.00608519	0.0175055	0.00408163	-0.00558659	-0.00189753
803	-0.0020202	0.0087146	0.00408163	0.011257	0.00571429
804	0.0183673	-0.0382979	-0.0201613	0.00561798	0.00190114
805	-0.0020202	0.0353201	-0.0161616	0.0245747	-0.00756144
806	-0.00604839	-0.00863931	0	0.00186916	-0.00189753
807	0.0224949	-0.0150862	0	0.0131579	0.00954198
808	0.00608519	0.0263736	-0.0121457	-0.0111317	-0.00189753
809	-0.022	0.0219298	-0.00609756	-0.012987	-0.0094518
810	-0.0259481	-0.0256959	-0.00406504	-0.00743494	0.0172414
811	0.0142566	-0.0021692	-0.00609756	-0.0203327	-0.0132075
812	-0.0020202	0	0.0122951	-0.00929368	0.00571429
813	-0.0259481	-0.0021692	-0.00609756	0.00561798	-0.00189753
814	-0.0020202	-0.0193548	0.0122951	-0.0148148	0.00571429
815	0.0163265	0.0131004	0.0122951	-0.00929368	-0.0132075
816	0	-0.00863931	-0.00609756	-0.0166667	-0.00568182
817	-0.0020202	0.010917	-0.0301205	0.00938086	-0.00189753
818	0.0101626	-0.012931	0.0143737	-0.00186567	0.0172414
819	0.0142566	0.00653595	0.0164271	-0.0203327	0.00190114
820	0.0142566	0	-0.0201613	0.00373832	-0.0094518
821	-0.0100604	0.0263736	0.00204082	-0.00186567	-0.0094518
822	0.0142566	0.0241758	0.00817996	-0.00372439	-0.00189753
823	0.0040568	0.0175055	-0.0181818	0.04	0.0172414
824	-0.00604839	-0.00863931	0.0102459	-0.0111317	0.00571429
825	0.0163265	-0.0150862	-0.0181818	-0.0148148	0
826	0.0224949	-0.00863931	-0.00203666	0.0245747	0.0133843
827	-0.0020202	0.00217391	0.00204082	-0.0348624	0.00954198
828	-0.0020202	0.0241758	0.00408163	0.0284091	-0.00189753
829	0.0142566	0.00217391	-0.0121457	0.0150376	0.00190114
830	0.0163265	0.030837	0.0247423	-0.00558659	-0.00568182
831	0.00608519	-0.00863931	-0.0161616	-0.00558659	0.0211132
832	-0.0180361	0.0241758	0.00408163	-0.0257827	-0.00568182
833	-0.0100604	0.0087146	0.00204082	0.00186916	-0.0094518
834	0.0101626	0.0263736	-0.0241449	0.0207547	-0.00568182
835	0.00202429	0.0131004	-0.0161616	-0.00558659	-0.00189753
836	-0.0160643	0	-0.00203666	0.0517241	0.00190114
837	0.0101626	0.0241758	0	-0.00558659	-0.00189753
838	0.0183673	0	0.00408163	-0.00186567	0.00954198
839	-0.0020202	0.0219298	0.00817996	0.00561798	-0.0206767
840	-0.0120724	-0.00649351	0.0310559	-0.00743494	0.00571429
841	0.0163265	0.0153173	-0.00406504	0.0150376	0.00190114
842	0.00608519	0.0153173	0.0247423	-0.0348624	-0.0132075
843	0.0101626	-0.0256959	-0.00203666	0.0169492	0.0172414
844	-0.0100604	-0.00863931	0.00613497	-0.0203327	-0.00568182
845	0.0101626	-0.004329	-0.00811359	0	0
846	0.00202429	0.0175055	-0.0121457	0.0361217	-0.00568182
847	0.0040568	0.010917	-0.00406504	0.00561798	0.00954198
848	0.0183673	-0.0172043	0.0247423	0	-0.0094518
849	0.00813008	0.0263736	-0.00811359	0	-0.00568182
850	-0.0180361	-0.004329	0	-0.00929368	0.00190114
851	0.00608519	0.0087146	0.00817996	0.0169492	-0.00568182
852	0.0101626	-0.00863931	0	-0.00929368	-0.0132075
853	-0.0140562	-0.004329	0.0226804	0	0.00190114
854	0.0308008	0.0087146	0.0122951	0.00186916	0.00571429
855	-0.0100604	-0.00649351	0	0.00186916	-0.00568182
856	0.0101626	0.0175055	0.00408163	-0.00558659	0.00954198
857	-0.0100604	-0.012931	0.0164271	0.0207547	-0.0169492
858	0.01222	-0.0362473	-0.00406504	0.0131579	-0.00568182
859	0	0.010917	-0.01417	-0.012987	0.00190114
860	0.0142566	0.0604027	0.00408163	0	0.025
861	0	-0.0172043	-0.0121457	-0.00186567	0.00954198
862	-0.0200401	0.0153173	-0.0320641	-0.0294118	-0.0094518
863	0.00608519	-0.00649351	0.00817996	-0.00558659	0.0172414
864	-0.0140562	-0.0021692	-0.01417	-0.012987	-0.0094518
865	-0.0140562	0.0153173	-0.00811359	0.0131579	-0.00189753
866	-0.00806452	-0.0256959	0.00204082	0.00749064	0.00190114
867	-0.00806452	0.0087146	-0.010142	-0.00558659	0.00190114
868	-0.0040404	0.00217391	0.0480167	-0.00186567	-0.00189753
869	0.00813008	0.0263736	-0.0399202	-0.0111317	-0.00189753
870	-0.00604839	0.00434783	0.0331263	-0.00743494	0.00954198
871	-0.0020202	-0.0341151	0.0143737	-0.0239852	-0.00568182
872	0.0163265	0.0219298	-0.0419162	0	0.00190114
873	0.0142566	0.0152838	-0.0261569	0.00186916	-0.0094518
874	-0.0020202	0.0443459	0.0164271	0.00938086	-0.0132075
875	0.00202429	-0.0172043	0.0143737	0.00938086	0.00190114
876	-0.0100604	0.0131004	0.0268595	-0.03125	-0.0094518
877	-0.0140562	0.0153173	-0.0161616	0.0131579	-0.00378788
878	0.0391753	0.010917	0.00408163	-0.00929368	0.0289017
879	-0.0020202	0.0153173	-0.00406504	0.0284091	-0.00568182
880	0.00202429	0.0087146	-0.0221774	-0.00186567	0.00571429
881	0.0204499	0.0153173	-0.010142	-0.012987	-0.0132075
882	0.0142566	-0.0299145	0.0205761	-0.0221402	-0.0132075
883	0.0101626	0.00217391	0.00204082	0.0438931	0.00190114
884	-0.0140562	0.00434783	-0.010142	0.0226415	-0.00189753
885	0.0142566	-0.00649351	0	-0.00372439	-0.00189753
886	-0.022	0.010917	-0.01417	-0.00558659	-0.00189753
887	-0.0020202	0.00217391	-0.036	-0.0203327	-0.0094518
888	0.0101626	0.00434783	-0.00811359	0.00938086	0.0133843
889	-0.00806452	0.030837	-0.0281124	0.011257	0.00954198
890	-0.0020202	0.0219298	0.0122951	-0.00929368	0.00190114
891	0.0183673	-0.0021692	0.0373444	-0.00558659	0.00954198
892	0.0101626	-0.012931	-0.01417	0.011257	-0.00189753
893	-0.0100604	0.00434783	0.0205761	-0.00929368	0.0172414
894	-0.00604839	-0.00649351	0.0143737	0.00561798	0.00571429
895	-0.0120724	0.0087146	0.0122951	-0.0111317	-0.0094518
896	0.0183673	0.0175055	0.00817996	0.00561798	0.0133843
897	-0.0259481	0.00217391	0.0164271	0.00186916	-0.00568182
898	0.00202429	0.039823	-0.00203666	0.00749064	0.0133843
899	0.01222	-0.004329	-0.00406504	0.00749064	0.00954198
900	-0.0100604	-0.0214592	-0.0121457	-0.00558659	-0.0132075
901	0.0040568	0.00653595	-0.00811359	0.0207547	-0.0094518
902	0.0142566	0.00434783	0.00408163	-0.00929368	0.00954198
903	0.0183673	0.030837	-0.0301205	0.00186916	-0.0132075
904	0.00608519	0.00217391	-0.00609756	0.0169492	-0.00189753
905	-0.0180361	-0.0278373	0.00817996	-0.00743494	0.00571429
906	-0.0040404	-0.0172043	-0.00406504	0.0131579	0.00761905
907	0.00608519	0.00434783	-0.0121457	0.00186916	-0.0169492
908	0.00813008	-0.00863931	-0.00406504	0.0169492	-0.0132075
909	0	0.0219298	0.0122951	-0.0203327	0.00190114
910	-0.0100604	0.00217391	0.0205761	-0.0203327	-0.00189753
911	-0.0020202	-0.00649351	0.00817996	0.0169492	-0.00189753
912	0.00608519	0	0.039501	0.00561798	-0.00189753
913	0.0183673	0.0087146	0.0185185	0.0226415	0.00954198
914	-0.00604839	-0.0107991	0	-0.03663	-0.0132075
915	0.00202429	-0.0150862	-0.00811359	-0.00558659	0.00954198
916	0.00608519	0.0443459	0.00613497	-0.00929368	0.00571429
917	0	0.0197368	-0.0221774	-0.0166667	0.00761905
918	-0.0180361	-0.0382979	-0.0121457	0	0.00190114
919	-0.00604839	-0.0320513	0.00204082	0.0169492	-0.0169492
920	0.0245902	-0.012931	0.0102459	0.00938086	-0.00756144
921	0.0163265	-0.00863931	-0.00811359	0.0284091	-0.0094518
922	0.01222	-0.0172043	0.0310559	0.0131579	-0.00189753
923	0.0455487	-0.00649351	0.0122951	0.0131579	0.00571429
924	0.00608519	0.0197368	-0.0221774	-0.00558659	0.00190114
925	-0.024	0.00217391	0.0122951	0.0245747	-0.0094518
926	0.0204499	-0.0107991	0.0122951	0	-0.00568182
927	0.00202429	-0.0193548	0.0122951	-0.0111317	0.00571429
928	-0.0259481	-0.0341151	0.0143737	0.0169492	0.00571429
929	-0.0040404	-0.0214592	0.00408163	-0.00372439	0.00190114
930	0.0183673	0.0175055	0.00408163	0.0188324	0.0172414
931	-0.0040404	0.00653595	0.0122951	-0.00186567	0.00571429
932	-0.0100604	0.0087146	-0.00406504	-0.012987	-0.0354478
933	0.00202429	-0.00649351	-0.0121457	0.00186916	-0.00189753
934	0.00202429	0.0131004	0.0102459	0	0.00954198
935	-0.00806452	0	-0.00811359	-0.0148148	-0.0094518
936	0.0224949	0.00217391	-0.0121457	-0.00186567	0.00954198
937	0.0101626	0.010917	0.00204082	0.00186916	-0.00568182
938	0.0101626	0.0197368	-0.0161616	0.00186916	-0.00189753
939	0.00202429	-0.0193548	-0.010142	-0.0166667	0.00190114
940	0.0142566	0.0175055	0	0.0207547	0.00571429
941	-0.0100604	0.0219298	-0.00203666	0.00561798	0.0289017
942	-0.00806452	-0.012931	-0.0241449	-0.0203327	0.00571429
943	-0.0040404	-0.0021692	-0.00406504	-0.0203327	0.00190114
944	0.0245902	0	0.00204082	-0.0239852	-0.00189753
945	-0.0140562	0.0331126	0.0226804	0.00186916	-0.0132075
946	-0.0120724	0.0219298	-0.0181818	-0.00743494	-0.00568182
947	0.0101626	-0.004329	-0.0261569	-0.0294118	0.0211132
948	0.00608519	-0.0362473	0.0373444	-0.0203327	0.00190114
949	0.00202429	-0.0172043	0.0122951	0.00938086	-0.00189753
950	0.0040568	-0.0150862	0.0102459	-0.00186567	0.00954198
951	0.0142566	0.00217391	0.00408163	0.026465	-0.0169492
952	-0.0180361	0.0353201	0.0122951	-0.0276243	-0.0132075
953	-0.0318725	0	-0.0241449	0.00186916	-0.00568182
954	0.0142566	-0.0320513	-0.01417	-0.00372439	0.00571429
955	-0.0020202	-0.00649351	0.0226804	-0.00558659	-0.00568182
956	-0.0040404	-0.004329	0.0205761	-0.0148148	0.00571429
957	0.0101626	-0.0021692	-0.01417	0.00561798	0.0172414
958	0.0142566	0.00434783	0.00408163	0.0284091	0.00571429
959	0.00202429	0	0.0247423	-0.0276243	-0.00189753
960	-0.00604839	0.0263736	0.00817996	-0.0221402	-0.0132075
961	-0.0020202	-0.00863931	0.00408163	-0.00186567	0.00571429
962	-0.0100604	0.0443459	0.0289256	0	0.00190114
963	-0.0298805	-0.0021692	-0.00406504	0.00561798	0.00571429
964	0.00202429	0	-0.0121457	0	0.00571429
965	0.00813008	-0.0424628	-0.00811359	-0.0111317	-0.0094518
966	0.0183673	-0.0021692	0.00613497	0.026465	-0.0169492
967	-0.00604839	0.00217391	-0.010142	-0.012987	0.00190114
968	-0.0020202	0	0.00204082	0.00938086	-0.00189753
969	0.0183673	0.0197368	-0.010142	0.0207547	-0.00189753
970	0.00202429	0.0087146	-0.00811359	-0.0148148	-0.0206767
971	0.00202429	-0.012931	0.0143737	-0.0348624	0.0211132
972	0.0040568	0.0153173	0.0247423	0.00938086	-0.00189753
973	-0.0020202	-0.0021692	0.00817996	-0.00186567	-0.0243902
974	-0.0100604	0.00653595	0.00817996	0.00561798	-0.00189753
975	0.0308008	0.0580357	-0.00811359	0.00561798	0.00190114
976	-0.0200401	0.0331126	0	-0.012987	-0.0094518
977	-0.0020202	0.00434783	-0.00406504	0.0188324	0.00954198
978	-0.00604839	-0.00863931	-0.0261569	-0.00186567	-0.00189753
979	0	0.0087146	0.00613497	-0.00929368	0.00190114
980	-0.0020202	-0.00863931	0.00408163	-0.0184843	0.00190114
981	-0.0020202	0.00434783	0.00817996	0.00561798	0.00954198
982	-0.0140562	0.0175055	-0.036	0.00186916	-0.0094518
983	0.00608519	0.00217391	-0.00406504	0.0169492	-0.00189753
984	-0.0100604	0.00434783	0.0373444	0.00186916	0.00954198
985	0.01222	-0.004329	0.0373444	-0.00558659	0.0172414
986	0	-0.004329	-0.00406504	0.00186916	-0.0094518
987	0.0224949	-0.0107991	-0.00203666	0.00186916	-0.0094518
988	-0.0180361	-0.0150862	-0.0181818	-0.00743494	-0.00568182
989	0.01222	0.0153173	0.0164271	-0.00372439	0.00954198
990	-0.0140562	0.0131004	0.0226804	0.0169492	0.00571429
991	-0.0100604	0.00653595	-0.038	-0.0166667	-0.0243902
992	0.00813008	0.0153173	-0.00609756	0.0169492	-0.00568182
993	-0.0020202	0.0331126	0.00817996	0.0131579	-0.0132075
994	-0.0040404	0.00434783	0.00408163	0.0245747	-0.00189753
995	0.0142566	-0.0107991	-0.0419162	0.00938086	-0.00568182
996	-0.0140562	0.0219298	0.0289256	0.00186916	0.00190114
997	-0.0100604	-0.0172043	0.00408163	0.00373832	0.00190114
998	0.00813008	0.00434783	-0.0161616	0.0131579	0.00571429
999	-0.0160643	0.0087146	0.00817996	0.0169492	-0.00568182
1000	-0.0100604	-0.0172043	-0.0121457	-0.012987	-0.00189753

[truncated: 10 more sheets: 10, 11, 12, 13, 14, 15, 16, 17, 18, 19]
